# Supplementary material for: EGFR Activates a TAZ-Driven Oncogenic Program in Glioblastoma
Source: Oxford University Press journal article supplement (doi:10.1158/0008-5472.can-20-2773), 2021-04-28
Supplement: 00085472can202773-sup-249394_3_supp_7061815_qrthcq.xlsx [file 00085472can202773-sup-249394_3_supp_7061815_qrthcq.xlsx]

## Sheet: Raw_Data
Gene Symbol	log_Fold_Change	FDR
TSPAN6	-0.340399	0.0063034
DPM1	0.156508	0.221167
SCYL3	0.478661	0.0158421
C1orf112	-0.24444	0.0912792
CFH	0.41558	0.106658
FUCA2	0.423649	0.0028962
GCLC	-0.979346	0.00441271
NFYA	0.0344855	0.549644
LAS1L	0.0610175	0.159705
ANKIB1	0.0666462	0.152786
CYP51A1	0.662387	0.00350373
KRIT1	0.328454	0.0230149
RAD52	-0.408321	0.0471091
BAD	0.50545	0.00883339
LAP3	0.0454349	0.507472
CD99	0.0731343	0.700349
MAD1L1	0.0217713	0.686966
LASP1	0.0198886	0.628851
SNX11	-0.0598494	0.873272
M6PR	-0.403284	0.367282
KLHL13	0.253198	0.00440354
ICA1	-0.584996	0.0218462
DBNDD1	0.438059	0.0027849
ALS2	0.336688	0.0632194
CFLAR	0.25459	0.0641684
NDUFAF7	-0.280569	0.149453
RBM5	-0.0543571	0.672774
MTMR7	0.0281006	0.924001
SLC7A2	-0.326476	0.253358
ARF5	-0.0342488	0.40406
SARM1	-0.00280546	0.984614
POLDIP2	0.0182231	0.661137
PLXND1	0.217466	0.0708519
AK2	0.0781853	0.102171
CD38	1.09003	0.0664844
FKBP4	-0.271225	0.00244899
KDM1A	-0.178496	0.00505307
RBM6	-0.191733	0.0939474
CAMKK1	1.1999	0.00600271
RECQL	0.346072	0.0498611
CCDC132	-0.355408	0.0727204
ARHGAP33	-0.298837	0.0147512
NDUFAB1	0.0798662	0.320517
PDK4	-0.533666	0.00412003
ZMYND10	-0.488584	0.208118
ARX	-0.268393	0.0676994
SLC25A13	0.166602	0.0524532
ST7	0.125972	0.334842
CDC27	0.3835	0.00490452
HCCS	0.281835	0.0217024
DVL2	-0.429262	0.00773863
UPF1	0.0401963	0.21141
SLC25A5	0.057786	0.09475
CCDC109B	0.61751	0.00219634
POLR2J	0.0903561	0.287602
DHX33	0.379333	0.00237502
THSD7A	0.0721647	0.704214
LIG3	-0.136638	0.190765
RPAP3	0.947161	0.00216622
AC004381.6	-0.257117	0.0913626
CIAPIN1	0.526831	0.0085969
SPPL2B	-0.332093	0.016851
FAM214B	-0.603499	0.0271479
PRKAR2B	-0.27969	0.147326
MSL3	-0.157006	0.136465
CREBBP	0.090326	0.0780969
BZRAP1	-0.827113	0.0129899
GCFC2	0.471951	0.037569
WDR54	0.115616	0.656571
CROT	0.432132	0.018339
KMT2E	0.147614	0.0745125
RHBDD2	0.562523	0.0248334
SOX8	-2.03362	0.000117416
IBTK	0.198275	0.0499409
ZNF195	0.0497862	0.606619
MYCBP2	0.696864	0.000758835
FBXL3	0.233908	0.102719
PDK2	-0.568681	0.00686178
ITGA3	1.81426	0.000413861
ZFX	0.412428	0.306982
LAMP2	-0.0556676	0.378936
GGNBP2	0.00795921	0.895572
ITGA2B	-0.480368	0.21425
GDE1	-0.373277	0.0370205
C19orf60	-0.157992	0.0816907
CRLF1	1.14071	0.0315976
OSBPL7	-0.155047	0.261651
TMEM98	-0.0425864	0.750868
YBX2	0.205774	0.443359
MAP3K14	0.856053	0.00753352
ABCC8	0.547333	0.0408015
SYNRG	-0.165513	0.0658863
TMEM132A	-0.635856	0.0914212
AP2B1	-0.00611549	0.924345
ZNF263	0.358556	0.0609322
CX3CL1	1.75784	0.00084929
SPATA20	-0.165125	0.263416
CACNA1G	-1.58298	0.00771628
TNFRSF12A	4.87607	5.21194e-05
MAP3K9	1.54479	0.000974178
RALA	-0.0629461	0.295084
BAIAP2L1	0.668622	0.0562716
JHDM1D	-0.569015	0.0213201
ETV1	-0.491894	0.000749463
AGK	0.361837	0.0187584
ALDH3B1	0.0932172	0.492045
PHTF2	0.812106	0.00236315
FARP2	0.805451	0.00130078
GGCT	0.0622241	0.378011
DBF4	0.373115	0.0637196
TBXA2R	-0.133886	0.57364
IFRD1	-0.353858	0.0123413
COX10	0.0934977	0.440944
GTF2IRD1	-0.417597	0.00348972
PAF1	-0.0211928	0.679983
VPS41	-0.250527	0.0166029
ELAC2	-0.0689116	0.296623
ARSD	-0.383704	0.0151859
ADIPOR2	0.207915	0.0204339
CDKL3	-0.121875	0.702264
MARK4	0.18568	0.0235883
PROM1	-0.159212	0.126004
CCDC124	-0.210797	0.0314221
PAFAH1B1	-0.0477655	0.456244
NOS2	0.621002	0.0245428
DNAH9	0.519512	0.00620797
KIAA0100	0.067453	0.224981
GAS7	0.173521	0.00417978
TRAPPC6A	-0.581203	0.00684661
ST7L	-0.261267	0.0552647
PAX6	-1.1676	0.00194481
RPUSD1	0.349722	0.129073
RHBDF1	1.82881	0.000518643
LUC7L	-0.0711781	0.602671
BAIAP3	0.582689	0.00455273
TSR3	-0.331026	0.00618002
PIGQ	-0.275372	0.0359831
CRAMP1L	-0.299849	0.0427155
TEAD3	0.841318	0.00471533
DNAJC11	0.222591	0.060227
MYLIP	-0.66536	0.153582
E2F2	-0.954754	0.00139267
PSMB1	0.152236	0.0413352
SYN1	0.688744	0.00598891
JARID2	0.215214	0.0620655
CDKL5	2.34129	0.022871
CDK11A	0.0317406	0.804288
NADK	-0.124612	0.0359382
TFAP2B	-0.482419	0.153117
CYTH3	0.386757	0.00514312
ADAM22	-0.22493	0.753627
SYPL1	-0.432402	0.0759314
CYB561	0.479258	0.103672
SPAG9	-0.355135	0.00405847
CELSR3	0.00518297	0.883908
AASS	0.127039	0.14376
SS18L2	-0.0850148	0.475372
MPND	-0.608163	0.00526786
MGST1	-0.587943	0.0833881
CRY1	0.121727	0.0524327
NFIX	-0.138881	0.643205
ST3GAL1	0.0734931	0.654207
MMP25	1.67244	0.00746714
IL32	0.974048	0.014522
PKD1	-0.257356	0.204069
MAPK8IP2	-0.186132	0.0225886
MED24	-0.237182	0.00595449
RHOBTB2	0.419944	0.00289872
HEATR5B	0.0965748	0.371754
SEC62	-0.0718741	0.589402
RPS20	-0.182897	0.0150236
CSDE1	0.254356	0.00411673
UBE3C	0.849134	0.000688583
REV3L	-0.185074	0.174859
MASP2	0.821198	0.0532773
FAM76A	-0.256964	0.184944
TRAF3IP3	-0.0736276	0.932539
POMT2	-0.423503	0.0032899
VTA1	0.155519	0.0640898
BAZ1B	0.270654	0.00133427
RANBP9	0.124257	0.0940525
ETV7	0.499803	0.00721082
SPRTN	-0.0393473	0.943756
METTL13	-0.47217	0.0028749
DYRK4	-0.209578	0.279631
ZNF207	0.304871	0.00326298
UQCRC1	-0.152366	0.0146668
STARD3NL	-0.00359649	0.969566
CD9	0.464541	0.0277385
NCAPD2	-0.702252	0.00182259
IFFO1	-0.407018	0.00857081
GIPR	-0.291094	0.619084
PHF7	-0.519389	0.0541727
NISCH	-0.267776	0.012237
FUZ	-0.97934	0.0047497
IDS	1.68519	0.000124465
ZNF200	0.251734	0.0836263
LRRC23	0.0550366	0.848181
SCMH1	-0.163801	0.623355
FYN	-0.342328	0.170666
HIVEP2	0.838903	0.0119173
TCEB3	0.0841621	0.705338
LYPLA2	0.0520171	0.799729
CLCN6	-0.370283	0.0242763
MRC2	0.0238758	0.401402
NME2	0.00065016	0.998931
TSPAN9	0.847594	0.00162682
BTBD7	0.00920368	0.909498
APBA3	-0.486015	0.018698
MKS1	-0.802067	0.0215263
ABHD5	0.312474	0.0582302
AKAP8L	0.140148	0.282034
MBTD1	-0.727839	0.00360566
UTP18	0.334124	0.00645005
RNF216	0.201161	0.0242793
TTC19	-0.181923	0.0830872
PTBP1	-0.283647	0.00455868
DPF1	0.483322	0.0038671
SYT7	1.16757	0.0222837
LARS2	0.437881	0.0741954
PIK3C2A	0.406695	0.0057713
PLAUR	0.113975	0.505471
ANLN	0.072689	0.374642
WIZ	0.0650481	0.240034
RABGAP1	-0.0326082	0.536374
QPCTL	-0.193409	0.175496
PPP5C	0.148411	0.0392466
CEP68	-0.203146	0.131339
MAP4K3	0.799126	0.00328195
TMEM159	-0.558556	0.0143286
BRCA1	-0.369519	0.232297
ERCC1	0.167452	0.0425346
SEMA3B	0.29536	0.0169974
MBTPS2	0.177249	0.0520677
PRICKLE3	0.3885	0.0203366
EXTL3	-2.50365	0.000177195
ELOVL5	-0.0781708	0.10676
KDM5D	-0.63848	0.0245086
CALCOCO1	-1.03574	0.00133268
UBR7	0.544457	0.0176147
MAP4K5	0.285136	0.0227619
EHD3	-0.420269	0.0153246
PSMC4	0.345311	0.00476692
MAN2B2	0.0234029	0.834727
SLC25A39	0.0502299	0.577662
MVP	0.46681	0.023006
NUB1	0.311297	0.00910846
PGM3	0.0798579	0.52068
RWDD2A	0.124848	0.564772
CLK1	0.169496	0.099486
POLR3B	0.419505	0.0458933
ANGEL1	-1.00106	0.000909882
RNF14	0.252755	0.0301864
DNASE1L1	-0.0123177	0.935814
DDX11	0.0995001	0.164583
HEBP1	-0.138646	0.34719
MAMLD1	2.05296	0.00185315
TACC3	-0.746267	0.000964943
UFL1	0.0460637	0.654595
POLA2	-0.304307	0.0178512
ZC3H3	0.126241	0.13262
CAPN1	-0.122104	0.173963
MDH1	-0.157475	0.0608785
SLC30A9	0.154375	0.352171
MTMR11	0.230754	0.134921
COX15	-0.175923	0.0410024
CCDC88C	-0.481533	0.00311683
YAF2	-0.408747	0.0187424
ZMYND11	0.522381	0.0132857
WAS	-0.269116	0.117399
BID	0.279312	0.0234104
MATR3	0.0719124	0.211381
XYLT2	-0.182268	0.228604
RGPD5	0.634942	0.00774085
NUDCD3	-0.115093	0.0480135
CHDH	0.0531844	0.338876
GLT8D1	-0.417093	0.0608969
ATP2C1	-0.281318	0.040444
SRCIN1	-0.322024	0.0286146
SLC38A5	0.240535	0.0325918
MAGIX	-0.571977	0.0347527
RALBP1	-0.418582	0.00400626
RUFY3	-0.342309	0.0110053
WWTR1	1.31761	0.000109216
AGPS	0.329768	0.0090147
CXorf56	-0.0220533	0.85424
ATP1A2	-0.843976	0.00805493
TTC27	0.401116	0.0175126
ZNF582	0.552717	0.0514398
PHLDB1	0.867154	0.000586572
PRDM11	-0.406347	0.159722
CD74	-0.0861737	0.46367
ZRANB1	-0.312475	0.023966
NCDN	0.524324	0.0097777
GPR124	0.155625	0.117365
ZFP64	0.0194074	0.841095
MNAT1	0.207828	0.36953
SAMD4A	0.21125	0.174431
RUNX3	2.47956	0.00330869
MRE11A	0.015189	0.9145
PLEKHB1	-0.223088	0.713542
SERPINB1	0.527403	0.0141401
SPAST	-0.413996	0.00865306
OSBPL5	0.513525	0.0137576
AQR	0.275939	0.0203079
FHL1	-0.158911	0.0255552
RTFDC1	0.103418	0.189705
SLC45A4	-0.79703	0.00717929
RNF10	-0.00104633	0.981406
ZNF839	-0.0728204	0.656392
ZDHHC6	0.344353	0.0120726
GRAMD1B	0.168025	0.75764
RNH1	0.0534814	0.450065
NDUFS1	0.112644	0.191721
RB1CC1	-0.203622	0.044623
ERP44	0.0219425	0.804889
ALAS1	0.240378	0.0231131
BIRC3	1.16838	0.00518778
AKAP11	0.454072	0.0132364
GLRX2	-0.0661712	0.612827
SNAPC1	0.181813	0.169812
DERA	-0.307828	0.187629
STRAP	-0.0683847	0.35082
PLEKHO1	-0.475725	0.0127535
GCLM	0.822286	0.00281503
UBR2	-0.335591	0.0209899
EHD2	0.957105	0.0978247
DEPDC1	0.125427	0.203148
CCDC28A	-1.31547	0.00309606
RRAGD	0.35676	0.00656646
HSF2	-0.0774327	0.502517
PHF20	-0.622626	0.00220258
HSD17B6	-1.22399	0.0115766
NR1H3	-0.588563	0.0148668
TYMP	-0.124882	0.398372
NCAPH2	0.00805477	0.939264
TOMM34	0.0556878	0.528534
SEC63	0.37116	0.00232391
KPNA6	-0.166224	0.651814
VIM	0.488351	0.00106407
RTEL1-TNFRSF6B	0.000633443	0.991736
FAS	1.07308	0.0341571
RNASET2	-0.0245761	0.881338
CD44	3.04867	0.000823928
AGPAT4	-0.257491	0.0137468
BTN3A1	-1.09834	0.0266356
MIPEP	-0.0250551	0.859786
IFNGR1	0.14788	0.205308
B4GALT7	0.000546681	0.996896
VRK2	1.03862	0.02842
TNFRSF1B	1.20127	0.00253971
VEZT	-0.00421179	0.966422
BRD9	0.136567	0.0912497
SNX1	-0.0732789	0.320806
TBPL1	-0.125206	0.213665
ARNTL2	0.650157	0.00647862
BCLAF1	0.0295827	0.712663
SLC39A9	0.14276	0.581228
TFB1M	-0.23936	0.365795
RABEP1	0.48508	0.00423616
HMGB3	-0.324637	0.00198967
NUP160	0.115829	0.0617351
BAK1	0.702088	0.00647131
GRN	-0.664832	0.0060384
FAM13B	0.188093	0.104178
ARHGAP31	1.10394	0.000637434
CENPQ	-1.00071	0.00344586
SARS	0.323252	0.0206185
RANBP3	0.00507753	0.907917
ARID4A	0.119481	0.303708
TSSC1	-0.12233	0.199012
PNPLA6	-0.542209	0.00223086
IFT88	0.0600074	0.742374
ALG1	-0.395948	0.0614372
ZCCHC8	0.113936	0.813707
ABCF2	0.305515	0.0045672
CHPF2	0.986127	0.00137366
FUT8	-0.188379	0.160537
UBA6	0.456583	0.00319651
GAB2	-0.084851	0.0946661
ATP6V0A1	0.996586	0.00278125
PIAS1	-0.0237289	0.826302
SLC4A7	1.05442	0.000586572
APBA2	-0.111903	0.0324936
UHRF1	0.503685	0.000722241
MAP2K3	1.93737	0.000309432
TMSB10	0.195608	0.00184742
ASTE1	0.466484	0.0372392
RNF19A	1.66695	0.000413861
PEX3	0.411364	0.0443599
GABARAPL2	-0.269995	0.123833
SH3YL1	-0.34751	0.0545873
FAM136A	0.143429	0.0387751
VCL	1.29681	0.000358738
DEPDC1B	-0.636539	0.00495713
DAPK2	-0.136653	0.529191
NSMAF	0.350981	0.0226614
ADSS	-0.295305	0.0884103
TIMP2	0.360994	0.618269
RFC1	-0.000410778	0.993561
TBC1D23	-0.183819	0.12091
CUL3	0.178132	0.0741501
ZZZ3	-0.172068	0.538556
USP2	-2.37558	0.000758693
TUBG2	-0.0396159	0.742863
RPL26L1	-0.12554	0.196649
NSUN2	0.654362	0.000751582
FBXO42	0.00591605	0.956031
MFAP3	-0.493133	0.646282
MRI1	0.144114	0.100692
METTL1	0.0483997	0.768946
AGA	0.143227	0.296623
PI4K2B	0.625433	0.00314709
BOD1L1	0.301961	0.00514697
MAT2B	-0.817315	0.00157392
EDC4	0.478091	0.0123611
TRIO	1.18529	0.000280468
VCAN	0.0476638	0.471748
CLEC16A	-0.0812299	0.299987
SKIV2L2	0.167029	0.0655912
ZFYVE16	0.493536	0.0270085
FAM65A	0.234538	0.0249302
RAI14	0.251303	0.0227619
PNKP	0.0904394	0.315182
PHLPP2	1.39321	0.000509404
SPDL1	-0.224747	0.0612054
STAU2	-0.19792	0.272646
PQLC2	0.297519	0.0353009
CTNS	-0.706682	0.119482
RTN4R	0.380757	0.00635544
PHF23	0.091395	0.141737
CDH10	-0.302281	0.173356
INPP4A	0.433838	0.00947997
PSMA4	0.00683543	0.93652
MYO16	0.0790982	0.717265
LSG1	0.384574	0.0101907
PARP3	-0.612704	0.0627425
TNC	1.66229	5.21194e-05
THAP3	-0.510843	0.00945905
FAM65C	-0.336994	0.185902
TDP1	-0.0222864	0.835146
AIFM2	-0.534073	0.265015
SPATA7	-0.478379	0.109137
MED17	0.310177	0.133654
RETSAT	-0.291036	0.101577
CAPG	-0.131975	0.403674
AP2S1	-0.128238	0.181057
DCUN1D1	0.0730579	0.42781
PHF15	0.0409432	0.528528
TRIT1	-0.478882	0.0135027
ADRB1	0.755395	0.0294645
CUL7	-0.485605	0.0100174
CTNNA1	0.516339	0.00393141
PHKA2	0.0675437	0.445674
CNTLN	-0.517397	0.105583
EPHA3	-0.224296	0.0266284
HSPA5	-0.116954	0.0130471
GEMIN8	-1.33516	0.00104354
OFD1	-0.0954703	0.232311
GPM6B	-0.107613	0.0166902
WDR37	0.100265	0.575913
YTHDC2	0.53369	0.0199805
CTPS2	-0.216315	0.0207557
ATP6V1H	-0.451154	0.0414195
POLR2B	0.271977	0.00510769
FAM214A	-0.741689	0.0101334
ARAP2	0.394633	0.0211987
TPR	0.357467	0.00240236
KIAA0556	-0.340556	0.0486118
DTNBP1	-0.309117	0.0380943
C12orf4	0.0477114	0.752474
SCML1	0.268004	0.0254167
WWC3	0.109225	0.0321719
FAM184B	1.03533	0.0167099
MAP4	0.267729	0.0095352
GOPC	0.112962	0.0620792
USP28	-0.58501	0.00332256
HDAC9	0.364153	0.0115302
TSPAN17	0.876908	0.0109643
NOP16	0.415831	0.00902921
CC2D2A	-0.224447	0.0852412
RRM2B	1.99445	0.000413861
ZNF800	0.910537	0.00196842
SNX29	-0.0172963	0.873468
MRPS10	0.159637	0.105726
RSF1	0.0589683	0.276324
VPS13D	0.580638	0.00770301
CELF2	0.00148033	0.982233
FAM120A	0.328483	0.00789634
R3HDM1	0.272355	0.024903
COL9A2	-0.0267804	0.804076
KITLG	4.84376	0.00184041
ERCC8	0.206581	0.139263
ADAMTS6	-0.578361	0.0604912
H6PD	0.150663	0.044093
VAMP3	0.255145	0.058038
PER3	0.511534	0.0214665
LTBP1	0.0884186	0.295917
RCN1	0.0389171	0.202663
ELN	0.0720632	0.696276
RFC2	0.0854092	0.285207
ARID1B	0.0315245	0.680292
CLPTM1L	0.146717	0.0452465
NEDD4L	-1.39804	0.00544177
PPP1R3F	0.345966	0.0159648
HEXB	0.236044	0.612494
PTCD2	0.617759	0.0155212
KIAA2022	2.30729	0.0041127
JKAMP	0.27693	0.366252
DKK3	0.180693	0.269978
NFE2L3	-0.157991	0.183364
MCUR1	0.262943	0.048619
LIMA1	0.78283	0.000917249
LETMD1	-0.870539	0.00225324
SLC4A8	-0.0277541	0.793086
LAMC3	-0.0669122	0.598973
MAPK9	0.364764	0.0157016
BCAR1	-0.468576	0.0558477
FAM160A2	0.150729	0.241152
HERPUD1	-0.724331	0.0153509
HOMER3	-0.136031	0.0493499
RAD51	-0.370543	0.0695136
POLQ	0.300526	0.0354096
PIK3CB	0.0674337	0.581006
THOC3	-0.141736	0.282509
HEBP2	0.0586458	0.542905
MPHOSPH9	-0.583147	0.00471533
PLEKHA5	-0.365142	0.0792657
SIKE1	0.0119808	0.885941
RRP12	0.345044	0.0427261
FNIP2	0.556488	0.00546775
MSMO1	0.770278	0.00100302
TTC17	0.159627	0.147775
FOXN3	-0.702321	0.0043513
AKR7A2	-0.471124	0.0660835
MRTO4	0.406436	0.00372164
USE1	-0.288521	0.059112
NRIP2	-0.130229	0.653965
LAMA3	-0.155898	0.817987
AP5M1	-0.185643	0.420716
ANAPC4	0.157377	0.211073
TRAPPC3	-0.25892	0.0377509
THRAP3	-0.171952	0.015618
PHPT1	0.262839	0.0260482
ENTPD2	0.379208	0.256938
ARID4B	-0.100231	0.353105
OPN3	-0.219893	0.195276
SDCCAG8	-1.02769	0.00130211
PTPRN	1.86376	0.00417054
KIF1B	0.579076	0.000749463
FOXC1	0.515938	0.00412003
TBC1D22A	-0.533039	0.0089385
SYNE2	0.144206	0.0151807
PLEKHH1	0.0878924	0.608973
ATP9A	-0.0826343	0.844786
FAM168A	0.170636	0.0157577
RELT	0.807257	0.00120025
GALC	-0.195038	0.231465
NOP58	0.62424	0.00660714
SZRD1	0.27286	0.00380009
KCNH2	-0.132735	0.0563821
CUL1	0.379595	0.00711034
FAM114A2	-0.482467	0.0280581
CYFIP2	0.802334	0.00340674
TAB2	0.236868	0.04721
GINM1	0.286447	0.0504113
EIF2AK2	0.365398	0.000829181
USP36	0.600292	0.00309302
KMT2C	0.675393	0.0045207
PUM2	-0.00984504	0.892106
MRPL43	0.0922177	0.32824
C4orf27	-0.14126	0.246428
ZFR	0.423279	0.0809322
ZNF280C	-0.0144307	0.858911
PHF21B	-0.10748	0.789145
TRAF1	1.42886	0.0289727
RC3H2	0.3891	0.00430264
PCGF2	0.491667	0.0036476
IL17RB	0.0807422	0.499622
TRAF3IP2	0.189298	0.248269
GYG2	0.318778	0.0808773
DCBLD2	1.38761	0.000364746
SOAT1	-0.0352132	0.498362
GDI2	0.0973131	0.0452101
ATG5	0.150237	0.134588
TMCC3	1.13481	0.0115766
PITHD1	-0.0412168	0.626306
MTA3	0.201362	0.183776
USP13	0.419325	0.0353178
ATP11B	0.526898	0.00956066
CDK14	-0.0214503	0.782651
SEC61A1	-1.04125	0.000358738
PPP1R12A	0.614294	0.00681261
CAMK2B	1.71464	0.0010056
CROCC	-0.842656	0.00146113
POLR3E	-0.0597542	0.513171
ATP2B4	0.464038	0.0352137
ZC3H11A	-0.341689	0.00274069
RIOK2	0.256218	0.0960347
YIPF1	-0.548643	0.024854
NDC1	0.114821	0.176834
DGKG	2.36827	0.000509404
FLYWCH1	-0.17971	0.0422928
UNKL	-0.613287	0.00622894
TBXAS1	0.349159	0.431755
PARP12	0.198761	0.368208
ALDH18A1	0.10413	0.0301864
TARBP1	0.103336	0.229826
PET112	-0.139083	0.2654
MXD1	-0.279122	0.567086
CDK17	-0.0377596	0.876192
DNAJC25	-0.137451	0.665098
SLC2A3	1.52143	0.00144641
PSD	-0.379652	0.0160069
CTDP1	-0.023997	0.732043
YBX3	0.290742	0.137746
WNK1	0.674579	0.01515
CCAR1	0.0561921	0.239346
OGFR	0.184457	0.00559205
PIGV	-1.87646	0.00219218
PTPRU	0.750131	0.0340236
SNRNP40	0.216519	0.0345999
RIMBP2	-0.0484234	0.784914
QSER1	-0.370069	0.0158273
MPC1	0.504953	0.00835154
ACAA1	-0.147657	0.187001
BCAT1	0.411992	0.00357282
HDAC7	0.0205564	0.774321
LZTS1	1.62196	0.000119764
SPAG4	-0.338324	0.175382
NCKAP1	0.402789	0.00167769
MRPS35	-0.166225	0.126868
SFSWAP	0.325103	0.047372
TNK2	-0.934584	0.000346971
MON2	0.511311	0.0116553
GPBP1	-0.113923	0.162747
DGAT2	-1.24053	0.00775151
ZNF112	0.315445	0.155378
CS	0.25682	0.00810121
LTK	-0.682912	0.178125
MRPS24	0.126727	0.443987
ELMO2	0.512187	0.054403
WAPAL	0.582665	0.00375919
VMP1	0.608681	0.00160661
APPBP2	-0.0895036	0.506203
POLD1	-0.320712	0.00311048
SEZ6	1.69886	0.0014321
EIF4B	0.186271	0.164587
SLC6A16	0.128341	0.396026
GLTSCR1	-0.0872978	0.174315
SPHK2	-1.07569	0.00113613
RPL18	-0.288705	0.00155615
CA11	-0.054302	0.543195
ISOC2	-0.409795	0.0506365
U2AF2	0.257735	0.00322675
EPN1	-0.198618	0.00469114
MED29	0.901065	0.0314383
AHRR	-0.921768	0.105695
ZNF275	0.645057	0.00175845
MTMR1	0.333339	0.00475409
GPC1	0.609367	0.000147271
ADCK1	-0.493393	0.0255988
HAGH	-0.347278	0.0108355
RNF4	0.273001	0.0579596
CASP8	0.915046	0.0585421
LIMCH1	-0.809692	0.0167292
ASUN	-0.345098	0.0482641
TM7SF3	-0.046868	0.656203
SPA17	0.105127	0.593996
ST3GAL6	-1.01231	0.00301875
NGFR	1.46957	0.000696627
CDON	-1.08258	0.000582065
TAF2	0.55906	0.00341616
HIPK2	0.81817	0.000205951
TNPO3	0.25438	0.0127585
MEF2BNB-MEF2B	-2.06569	0.0277874
RFXANK	-0.0980609	0.52483
TMEM161A	-0.566167	0.0430618
LPAR2	-0.469135	0.0794745
CTSA	-0.335975	0.01001
SUGP2	-0.232076	0.165594
SLC12A2	0.555403	0.00295595
SNX24	-0.196363	0.331079
EYA2	0.371276	0.0863022
CNN2	1.73294	0.00835154
ABCA7	-0.784389	0.00425049
SNCAIP	-1.38154	0.0139292
DDX20	0.0437319	0.647247
BTBD1	0.165699	0.0545132
FAR2	1.04494	0.1275
SBNO2	0.565491	0.000801397
PMS1	-0.192941	0.109628
HMG20B	0.108134	0.268783
TAF11	0.021006	0.81801
ANKS1A	-0.153569	0.032203
AP3D1	0.186857	0.0676571
ZNF76	-0.280133	0.0105458
SLC9A3R2	0.140836	0.177868
NTHL1	-0.618439	0.005584
UHRF1BP1	0.682886	0.0021658
GNAI3	0.339798	0.00437277
IPO5	0.095747	0.100169
OAT	-0.077993	0.319849
WDR3	0.25562	0.00455489
PKN2	-0.1518	0.0589982
WDR18	-0.192987	0.0307175
TRAM2	0.831308	0.000427683
NTN1	0.104813	0.244986
MCM10	-0.0218542	0.847403
DGKA	0.40788	0.0841795
ERBB3	0.366405	0.125443
ANKRD44	0.347127	0.195676
KARS	0.205551	0.0120664
ADAT1	-0.0219024	0.867448
PDIA5	-0.0278971	0.751653
TBC1D22B	0.130856	0.361318
NDUFB4	0.0551835	0.566813
SPEN	0.572843	0.00076279
MYLK	0.883067	0.00777087
ZC3H15	-0.088389	0.690886
MAP2K4	0.651913	0.00855565
TMEM206	0.161142	0.0797483
SLK	0.747122	0.00123189
CYB5R4	0.203541	0.0872648
GSTO2	0.389209	0.374969
SEC61A2	0.14404	0.195918
PRKCQ	0.391388	0.0387531
TLE2	-0.887636	0.00124788
ASB1	0.939846	0.30304
FAM107B	0.0696862	0.845469
ME1	1.78291	0.00475436
TBC1D1	0.186002	0.0493283
CDK13	0.424685	0.00239917
MTHFD2	0.411899	0.00397399
SLC9A7	0.67737	0.0111946
FOXJ2	0.319679	0.0167213
YBX1	-0.0967077	0.00697136
PDE4A	0.132675	0.297515
PPP2R5A	0.200779	0.181566
ELAVL1	0.325682	0.00291574
DIP2B	-0.0790916	0.0981199
SMARCD1	0.0404354	0.722512
KDM4A	-0.471411	0.0011609
NFYC	0.0477625	0.751959
SLC9A3	-0.247591	0.237875
NGEF	2.5046	0.00216622
ASPM	-0.0259772	0.629281
ELOVL1	0.564905	0.0290407
MPPED2	-1.00168	0.00382754
ZBTB11	0.441816	0.0281884
ATXN3	-0.0851448	0.53846
GOLGA5	0.16842	0.215209
FGFR2	-0.731574	0.00883083
LRRC40	0.0202505	0.798929
ISOC1	0.224307	0.067736
EML1	0.874535	0.0695267
TRMT11	0.0365196	0.742946
THUMPD1	0.0459945	0.54516
MSANTD3	0.523619	0.0130873
ATG2B	0.154029	0.130489
ARFGEF1	0.655244	0.00244461
ZFAT	-0.460724	0.0139197
MTFR1	-0.373276	0.0277086
STAG3	-0.111456	0.382043
FECH	-0.22107	0.31069
MYO9A	0.305729	0.12285
DDX3Y	0.356106	0.00749332
PFKP	0.992222	0.000263368
IDI1	0.688069	0.00159602
SP100	0.611457	0.00228747
KLF6	0.825753	0.111205
PPAP2A	-0.171024	0.333147
NEO1	0.263735	0.0234681
TRAM1	0.291831	0.00617246
PHKA1	0.0121813	0.90312
TNFRSF1A	0.886993	0.00516402
CACNB1	0.312674	0.0338861
EVI5	-1.07409	0.163595
STOML1	-0.294531	0.0571677
PKM	0.760123	0.0218884
DHX29	0.163755	0.111991
DNTTIP2	0.567913	0.0111998
METTL22	0.500428	0.0301504
TP53BP1	-0.252224	0.0900209
TRO	-0.937392	0.189758
RRP15	0.522699	0.0182958
RHOA	-0.0576092	0.105252
DHX8	0.0151098	0.777569
PMS2P4	-0.361171	0.345863
PRKCZ	-0.518531	0.0113187
ZFY	0.317985	0.555344
IARS2	-0.139114	0.0434308
IDH3G	-0.152026	0.0517861
ROGDI	-0.152635	0.256004
PDZD4	0.593913	0.000989929
ATP2B3	0.0923899	0.711502
ROCK1	0.444604	0.00694442
CBFB	0.797883	0.00184501
PDK3	0.115136	0.457474
HYAL2	-0.154204	0.0475473
HDAC4	-0.32866	0.00518778
RASSF1	0.0856281	0.338643
FGFR3	-0.817466	0.000586572
IFI35	-0.101236	0.0353359
HEATR6	-0.039917	0.652154
COASY	-0.28288	0.0516463
PLEKHH3	-0.517264	0.00373988
MEF2A	0.411353	0.320924
OTUD5	-0.0402856	0.459752
TFE3	0.488938	0.00106843
TBC1D25	0.16986	0.561068
ACSL4	0.549887	0.00194903
INPP5A	-0.261629	0.067986
GPKOW	-0.180609	0.0268313
GRIPAP1	-0.129483	0.0476927
FTSJ1	-0.134345	0.0859775
PRR11	-0.510811	0.00774205
REEP1	0.00649752	0.960193
ATP11A	0.9848	0.0766016
POLR1A	0.303408	0.00401738
LAPTM4A	-0.412364	0.00383745
TTC7A	0.133668	0.757196
IP6K2	-0.246506	0.0957372
SRBD1	-0.487286	0.0101703
CYFIP1	0.0397374	0.464604
KIF2A	0.308646	0.0101868
RASGRP2	0.624121	0.0842109
PSME4	0.856209	0.00548348
IFT80	-0.410306	0.0253872
SIRT2	-0.307397	0.0110144
ERLEC1	-0.149944	0.12134
PPP2R5B	-0.326963	0.0375875
PITX1	-0.299514	0.0194755
MAST4	0.43173	0.423518
NUP133	-0.0947631	0.276324
NUCKS1	0.119131	0.00485893
VPS35	-0.216689	0.0149425
DNAJA2	0.356634	0.00469025
BCL3	0.482623	0.0085201
KCNAB2	-0.230414	0.227673
GAL	1.05166	0.0297864
FUNDC1	0.111822	0.387304
MAOB	0.844037	0.000417944
RORA	0.267514	0.815095
DRD4	-0.797483	0.0468331
TGFBR3	0.93819	0.109831
ATP1B3	0.364851	0.341194
NEDD4	1.41233	0.000794965
PIGB	-0.00475769	0.984556
MAPK6	0.461253	0.0052257
GNB5	-0.0311922	0.799946
RAB27A	0.676182	0.011124
CECR5	-0.625698	0.121631
UFD1L	0.0922362	0.196662
LRP6	-0.100944	0.13066
PHRF1	0.275534	0.00304139
IKBKAP	0.231176	0.0448287
NUCB2	0.0933364	0.28733
PFN2	-0.445669	0.0090551
PTPN3	-1.94713	0.0043513
SPTB	-0.390501	0.235214
SLC44A1	-0.332949	0.0194403
TMEM260	-0.0746127	0.750325
SMG6	0.198488	0.0228121
EXOC5	0.235971	0.0152735
CLTCL1	-0.386493	0.0291895
FGF22	0.876095	0.0607871
FSTL3	-0.771645	0.004301
DGCR2	-0.24647	0.0582694
RNF126	0.595327	0.00167051
MNT	-1.33281	0.000335755
ZXDC	0.43015	0.0171433
JMJD6	0.451246	0.00467396
POLB	-0.631432	0.0137576
WIPI1	-1.12063	0.00785541
GBA2	0.281704	0.0719507
NDST1	-0.272452	0.611367
ASNS	0.289356	0.0224201
AP3M2	-0.235479	0.124449
ST6GALNAC2	-1.28085	0.0130028
PABPC1	0.0313866	0.775457
TESK2	-0.129573	0.611944
C16orf80	-0.161143	0.125784
CSNK2A2	0.424027	0.00708542
PTPN21	0.456997	0.0092924
EIF2B3	-0.0155205	0.874044
CAMK2A	3.51779	0.000119764
TCOF1	0.39511	0.00124788
CDC42	0.946772	0.000527408
OSBPL3	1.06036	0.00075224
RAD18	0.170363	0.239555
ATP2B1	0.875262	0.000362166
NCK2	0.759798	0.000621542
MAP4K4	-0.0162142	0.429504
MGAT4A	0.13525	0.61428
RPL31	-0.400612	0.00169406
WDR1	1.33001	0.000129645
SNX13	-0.135114	0.109575
RPS6KA2	0.636436	0.000929607
ING3	0.290616	0.0263124
VASH1	-0.149733	0.0166028
LMCD1	0.162618	0.638129
WBSCR22	0.048566	0.311931
SEL1L	-0.06656	0.334935
TRIP13	0.0282314	0.82217
ATP6AP1	-0.232717	0.00343286
TCF3	0.0744795	0.0912497
TRIB2	1.31396	8.45326e-05
DAZAP1	-0.119517	0.0878923
MBD3	-0.156617	0.192784
HLTF	0.383714	0.0120163
FAM50A	-0.107262	0.0349213
FAM3A	-0.127026	0.119559
CPSF1	-0.186676	0.00510125
CYBRD1	-0.179846	0.0637206
PDCD2	-0.0916785	0.293947
RDH11	0.103634	0.265488
PRKACA	0.465732	0.00237927
LPHN1	0.196713	0.00773881
ACTN1	1.57995	0.000142761
ZFYVE26	-0.281046	0.0113548
EPN2	0.806398	0.0842109
PTPN18	-0.409837	0.0465013
LIMS2	0.065659	0.832229
ASIC4	-0.389124	0.00702949
SPEG	0.42109	0.00385875
LNX1	0.881914	0.0319477
ALDH3A2	-0.570523	0.00273505
TFRC	0.812936	0.0349795
SREBF1	-0.643686	0.00201779
AFF4	0.750462	0.00159461
UBE2D1	-0.516473	0.0456194
MPP5	0.119294	0.30352
RHOBTB1	-0.181024	0.097912
SMC1A	0.386291	0.00124166
HSD17B10	-0.190939	0.0100858
MARK2	0.201897	0.0765437
HMMR	-0.920079	0.00316618
CHFR	0.312221	0.0162337
P4HA2	1.59835	0.00140424
NFATC3	0.058991	0.484496
TRNT1	-0.15244	0.557772
ACADVL	0.301844	0.00469516
STK10	1.16597	0.000460916
FBXW11	0.0611646	0.23171
ACAP1	0.00956889	0.96997
CRMP1	-0.232727	0.00235194
EVC	1.06973	0.00076279
DERL2	0.110157	0.538673
NDE1	-0.117243	0.324512
MRVI1	-0.608747	0.0774118
TMEM38A	0.267026	0.0480679
AP1M1	0.142837	0.316703
PVR	0.386538	0.027192
IKBKG	0.304651	0.0334469
XRCC1	-0.230988	0.0234681
SCARB1	0.0650373	0.237268
MCM2	-0.326058	0.00189166
PANX2	-0.100047	0.666741
SELO	-0.141065	0.0627356
LLGL2	-0.526313	0.0371036
PDE8A	0.178482	0.427022
CLCN4	-1.0977	0.00404193
NLE1	0.264871	0.0144693
SDHA	-0.212887	0.0115241
SMARCE1	0.0960519	0.661064
GSDMB	-0.127879	0.620083
KDM5A	0.0283521	0.655424
ADAM11	-0.101639	0.527254
PPP2R3A	1.31032	0.0318912
FERMT2	0.856498	0.004719
IGF2BP2	0.552919	0.00563227
MAP3K13	-0.0154696	0.955338
ST6GAL1	-1.26364	0.00144301
TBX21	1.20875	0.0233793
VDAC1P1	0.312498	0.248023
FRY	-0.680241	0.14441
PICALM	-0.105844	0.144717
NSF	0.104533	0.672471
GLI2	0.340817	0.0201203
CLASP1	-0.044583	0.353288
MRPS34	-0.248942	0.0142255
NOTCH3	-0.275262	0.00185272
CLNS1A	-0.435967	0.00293572
TEAD2	-0.552492	0.0027849
EED	-0.24575	0.0534465
CDHR2	1.01463	0.00469025
SNCB	2.83824	0.0082307
TSG101	-0.189092	0.107186
C17orf85	0.0439847	0.570343
ATP2A3	0.0370841	0.91912
CA12	-0.438603	0.168726
MGLL	0.333297	0.207444
BCS1L	-0.199868	0.301623
NUAK1	0.487283	0.00509568
DPP8	0.605897	0.00718485
SLC24A1	-0.32697	0.0994508
ZNF532	0.623757	0.0378726
LMAN1	0.234648	0.00793868
PTPLAD1	0.224086	0.0202637
ZZEF1	0.273296	0.0103081
ENO1	0.191117	0.00563227
C19orf10	0.013179	0.838303
ANO8	-0.354524	0.00344873
TUBE1	0.340612	0.241701
ARHGEF10L	-1.02355	0.00085862
KCNQ2	-0.411638	0.00121607
TACR2	0.522084	0.165402
ACTR6	-0.323057	0.0241611
TIPIN	0.642769	0.0057713
SRI	-0.2212	0.00667498
EIF4G3	0.15115	0.0208244
NUP37	-0.0680012	0.69442
SEMA3A	1.24005	0.000227991
GTSE1	-0.459935	0.00300462
TTC38	0.526287	0.194137
ACAT1	-0.301167	0.0203044
GRAMD4	-0.533868	0.00219634
CELSR1	1.00685	0.0110443
ZNF638	0.0656123	0.18555
SLC25A40	0.0484855	0.573638
TIMM21	0.174961	0.146525
ADD2	0.209888	0.009806
RASAL2	0.692895	0.00583391
VPS9D1	-0.461433	0.00562762
ZNF37A	0.634534	0.00187689
MARK3	0.0741514	0.773381
SLC25A3	0.0613085	0.262158
FNDC3B	1.02853	0.000800896
FOSL2	2.46012	0.00010286
CACNG5	1.93597	0.000688583
CACNG4	-0.488746	0.00131047
FRYL	0.811314	0.00252684
TMEM131	0.57601	0.00109739
FSCN1	-0.0939776	0.0053941
ACTB	0.702058	0.000129645
PLD1	-0.406227	0.272796
WDR62	-0.226129	0.0268604
DLG1	0.587158	0.00194481
RAB7A	0.115034	0.303351
BCAP29	0.191322	0.219444
SEC31B	-0.57044	0.081605
SART3	0.0442808	0.313513
EXOSC7	-0.0804573	0.368327
KIFAP3	-0.438789	0.0132987
MKRN2	-0.378264	0.0102476
MCM6	0.319235	0.00408957
REXO2	-0.399245	0.0343639
RBM7	0.397272	0.0181597
RBMS2	-0.530208	0.123483
BAZ2A	0.559747	0.00227202
PTPN23	0.00738318	0.933322
MLH1	-0.194507	0.080208
UNG	-0.68372	0.0011996
KLHL20	0.528142	0.00447556
SLC46A1	0.152046	0.42313
PLXNA2	-0.967805	0.00035098
SPAG5	-0.653076	0.00474387
ANKRD13A	0.304847	0.0244042
TPD52	-0.583353	0.00814591
ACACB	-0.563774	0.0238095
TRAF4	-0.329772	0.0408534
PAG1	0.626543	0.00485711
GPATCH1	0.0677437	0.470855
ICAM3	0.00684939	0.967008
NT5C2	0.419327	0.218835
MCAM	0.199377	0.0465145
GPC4	-0.867705	0.0118124
MBNL3	0.200301	0.100169
CAMSAP3	-1.26205	0.00310701
RAP1GAP	-0.587501	0.00408756
XAB2	-0.524382	0.00282232
ARHGEF1	-0.0919599	0.258811
MAP2K7	-0.127402	0.385722
DGKD	0.497012	0.0023548
ACTL6B	-0.629824	0.110502
TOP2B	0.125183	0.0234046
TM9SF3	0.326494	0.00361094
NFKB2	0.151422	0.0779696
UBE2T	-0.364019	0.00846934
PPP1R12B	-0.242317	0.0332479
DNAJC10	0.148331	0.118453
GTF3C1	-0.00461556	0.949002
IL4R	4.04524	0.032203
USP33	-0.323636	0.0276579
PAK3	0.270155	0.0192245
CAPN6	-0.944347	0.101506
DCX	-0.337617	0.000784031
SNRPA	-0.273488	0.494372
EXOSC5	-0.531282	0.00371121
DYNC1I2	-0.272891	0.018698
LRCH4	-0.0576211	0.570837
FAM76B	0.18153	0.389952
SIRT6	-0.294449	0.0250377
POLD3	-0.0575457	0.447061
ACTN2	2.03123	0.00341926
CAPZB	0.0561793	0.72429
GPR137B	-0.446754	0.0111654
PHF17	0.0575198	0.851463
SLC25A43	0.680685	0.00816919
UBE2A	-0.227384	0.107844
FGFR1	0.439047	0.00268372
GTF2I	-0.103716	0.188711
FBLN1	-0.19768	0.0245551
MAP2	-0.273951	0.0344387
PIAS2	0.143643	0.527066
AMPH	-0.278168	0.421241
ARAF	-0.159808	0.0205934
MCCC1	-0.255011	0.0551474
LAMP3	0.729836	0.0526936
NEBL	-0.109318	0.165693
ACER3	0.731888	0.220166
UBE2K	0.231485	0.123783
PIK3C3	-0.0105528	0.931124
N4BP2	0.770382	0.032203
C12orf5	0.849019	0.00252684
TULP3	-0.169614	0.261363
SYNJ2	2.02323	0.000280467
PPP2R5C	-0.119746	0.239805
PMS2P1	-0.0119031	0.962034
GNB1	0.275714	0.0010056
MLLT10	-0.356444	0.0178508
ZCWPW1	-1.22459	0.011197
ADCYAP1R1	-1.59129	0.000216511
NRD1	0.188309	0.012332
VDAC3	-0.176827	0.213222
PCM1	0.359969	0.00204904
TNRC6C	0.264927	0.0123414
CBFA2T2	-1.35508	0.000991311
ITCH	0.55162	0.146684
TP53INP2	0.571846	0.00332208
SDF4	-0.292679	0.233254
MYH7B	-0.167964	0.522293
TP73	0.067091	0.367772
TOLLIP	-0.0376977	0.603276
UBE2D4	-0.316522	0.0476478
THOC1	-0.168112	0.426939
FKBP7	-0.496117	0.197523
OSBPL6	0.71704	0.00130078
SLC1A3	-0.215716	0.13524
XRCC5	0.300399	0.00146161
MKNK1	-0.0618289	0.613162
TNS1	1.38905	0.000739345
REXO1	0.185243	0.0366321
SAR1A	0.272235	0.0048884
CDC14A	0.271489	0.110213
RAPGEF3	2.20574	0.000982279
SENP1	0.437333	0.0125042
CIC	0.00895861	0.768925
LIPE	-0.607563	0.0360323
FDFT1	-0.103837	0.600002
PAFAH1B3	-0.0816328	0.29137
OPHN1	-1.31643	0.000922389
KIF22	-0.519468	0.00147255
LRRC16A	0.16397	0.137281
PGM1	0.12836	0.173467
DDX1	0.104972	0.00182272
DNM2	-0.0094101	0.929441
EPB41L2	0.581378	0.0444647
STX7	-0.550977	0.0145444
RABL2B	0.171685	0.621093
KEAP1	-0.220836	0.202857
DCT	-1.16241	0.0140493
SLC35C2	-0.431554	0.0345897
RFX3	-0.359348	0.00401761
RIF1	0.646337	0.000540185
RAB21	0.177217	0.0311757
SLC4A4	-0.883346	0.039941
SMARCA2	-0.721551	0.0914212
SESN1	0.171981	0.213727
SRCAP	0.488915	0.000460916
KIAA0020	0.711035	0.00136632
KCNN2	-1.62758	0.00623604
CNOT4	0.350685	0.0394388
PSEN1	-0.344149	0.00902921
CPOX	0.220366	0.0961591
CLDND1	0.262494	0.260686
MOK	0.328014	0.14866
HSP90AA1	-0.247954	0.00226236
RBL1	-0.300293	0.0191807
DLGAP4	-0.315994	0.0344473
IGSF9B	1.18386	0.002961
CROCCP3	-0.382025	0.0918982
NDC80	-1.0267	0.0013169
AP4E1	0.0514302	0.670213
RSBN1	0.217204	0.0386172
MAGI3	-0.0127504	0.940973
CXCL2	-0.828096	0.0348811
COL4A4	-0.197716	0.211889
TCF7	1.3287	0.0259008
OSTM1	0.389968	0.0169707
PCNP	0.100007	0.249522
EXD2	-0.653859	0.0296339
ARG2	-0.53292	0.0176962
MEF2C	1.0274	0.0135033
UBA5	0.153069	0.099486
STK17B	-0.101489	0.729051
CDC14B	0.299319	0.0484202
ZNF510	-0.0610513	0.486402
ZNF506	-0.178817	0.417258
JMJD4	0.153683	0.719932
DUSP12	0.25034	0.105222
AACS	-0.231609	0.335742
KIAA0141	-0.0011313	0.987189
CADPS2	-0.43329	0.025853
HSPB11	0.0316941	0.742847
PHLPP1	-0.543918	0.000982883
ATP8B1	0.14619	0.796948
SMARCD3	-0.255659	0.0644071
WDR70	-0.284457	0.0266248
STRADB	0.180455	0.423153
BZW1	0.0513546	0.508345
ME2	-0.0819502	0.245678
C5orf22	0.44609	0.0155842
CCNT2	0.490862	0.275733
FAM135A	0.831153	0.00244942
COBLL1	1.6242	0.00183569
DLG3	0.075468	0.778285
TRAF5	0.565285	0.00732804
MRPL22	-0.0393707	0.72214
GEMIN5	0.303229	0.0196271
NFE2L1	-0.21989	0.144034
SEMA5B	-0.421429	0.00296503
GSK3B	0.206738	0.0085382
ITGB5	-0.810306	0.00307777
ERC1	0.53156	0.0182127
XPO1	-0.472237	0.00162682
RNF13	-0.282558	0.465271
TRPM3	0.72182	0.0203366
PALB2	-0.226448	0.0806694
DOPEY1	0.0878316	0.406975
LYRM2	0.210945	0.0514535
BCKDHB	-0.400623	0.0300414
KAT6A	0.448224	0.0011732
ZCCHC6	0.48515	0.0329166
ULK2	0.221092	0.0686832
TNPO1	0.0245966	0.953832
PLOD1	0.00421608	0.927344
P2RX5	0.54368	0.0638359
ITGAE	0.0341122	0.824045
DIS3	0.598238	0.00160801
PIBF1	-0.385842	0.0425887
TDRD3	0.152437	0.197145
NUFIP1	0.469731	0.0685443
PDS5B	0.0241675	0.692511
OXCT1	-0.0786368	0.236367
RRAGB	-0.486192	0.00548276
CYLD	0.454032	0.194107
SLC27A5	-0.110132	0.468684
ZNF324	0.612262	0.00545565
ZNF416	-0.0381148	0.844464
ZNF586	0.0553183	0.789723
ZNF446	-0.38946	0.0152167
ZNF8	-9.53608	0.0239332
ZNF264	0.185195	0.769467
RPS5	-0.127675	0.402725
FAT1	0.93	0.00404638
YTHDC1	0.218632	0.511072
CHMP2B	0.843088	0.0138112
SMAP2	0.757736	0.00271769
PPIE	-0.385968	0.0128596
ZMPSTE24	0.460208	0.0049691
STARD7	0.157987	0.0162765
NOA1	-0.614838	0.00242214
REST	-0.00536569	0.944923
SSH1	0.20112	0.176661
GSTP1	-0.439125	0.000964534
APLP2	0.0454359	0.134567
KIAA1467	0.0913298	0.391161
WBP11	0.139493	0.205714
EIF3I	-0.0113134	0.830813
NKAIN1	-0.313554	0.0164081
COL16A1	-0.0355989	0.675867
TXLNA	0.492201	0.00317538
NCOA1	-0.170787	0.0803933
AGBL5	-0.246143	0.0640731
EFR3B	-0.241697	0.203488
KIF3C	-0.386458	0.00472529
RAB10	0.141672	0.0232312
HADHA	-0.072331	0.203866
MAPRE3	0.164982	0.110213
CAD	-0.152984	0.0528844
CD59	-0.168236	0.62455
CD82	1.44523	0.00581194
BCORL1	0.171028	0.0402726
ATRX	-0.167203	0.0163608
TAF9	0.17943	0.0580299
MYNN	-0.302831	0.0536775
SCAMP1	-0.139812	0.0618467
PREP	0.141831	0.164339
HACE1	0.271956	0.0438918
SEH1L	0.651636	0.00359139
WDR47	0.0985535	0.15054
WDFY1	0.471162	0.465443
OVGP1	2.2005	0.016637
SLC25A24	0.117188	0.200705
MAP3K4	0.517008	0.00276356
IGSF9	-1.06118	0.000518643
ZNF213	0.00570982	0.955032
AKR1B1	-0.164175	0.0362161
CPNE3	0.282173	0.0252909
RRN3	0.169675	0.0582302
CTTN	0.613956	0.00056554
MTIF2	-0.174849	0.0773353
DDHD2	0.734289	0.00767872
TTC39A	0.237195	0.535136
EPS15	-0.152551	0.0786462
ORC1	-0.138391	0.189239
MGST2	-0.277866	0.242195
CHERP	0.32057	0.00236859
ATG16L1	0.423484	0.0119658
USP40	-0.34551	0.0131119
POMGNT1	0.211087	0.0741501
RAD54L	-0.613881	0.00691787
MAST2	0.102714	0.092475
DNAJA1	0.202474	0.0035812
B4GALT1	0.397401	0.0114394
CHMP5	-0.128672	0.0836931
NFX1	0.411868	0.0058387
DIMT1	0.230746	0.0342366
IPO11	-0.00986679	0.949002
EIF2AK1	-0.00810452	0.889967
EPDR1	0.0524792	0.818494
SNX10	0.389413	0.179189
SEPHS1	-0.256522	0.0144457
MRPL28	0.053014	0.387205
HBQ1	0.389573	0.252444
ITPKC	1.60971	0.000238273
RBM22	-0.0244522	0.864903
TMED2	0.181792	0.0201354
ERO1LB	-0.182783	0.489709
ZFAND6	0.332199	0.0206281
TXLNG	0.0488112	0.359391
LAT2	0.633803	0.0785665
HUWE1	0.342979	0.00338808
ZW10	0.179866	0.241307
ALG9	0.0697462	0.598277
MYBPC2	0.656215	0.0149584
ACOX3	0.19788	0.0987075
MTMR2	0.791382	0.00664018
PPP1R15A	1.27348	0.000459512
HSD17B14	0.209874	0.542129
TRIP6	0.413106	0.0685387
ACHE	1.3818	0.0032672
FTL	-0.560123	0.000292854
SRRT	0.425609	0.00100214
BAX	0.562987	0.000896934
NLK	0.373611	0.0109643
PIGS	-0.253337	0.0171829
ATXN7L3	0.0536938	0.221509
PGS1	-0.262965	0.103903
PSMC5	0.0672839	0.159691
UIMC1	-0.0280538	0.861496
MMP2	-0.102341	0.644275
MT3	-0.780387	0.284644
LPCAT2	0.143886	0.601474
GNAO1	-0.863416	0.000965254
OGFOD1	0.2252	0.0342014
SH3BP2	0.162637	0.0777369
NOP14	0.110115	0.0679933
ADD1	0.224772	0.0952713
L2HGDH	-0.0364157	0.724042
TXNDC16	0.0477428	0.630348
C14orf166	-0.266562	0.0175728
NID2	1.24131	0.00802425
GMCL1	-0.652561	0.00648908
SF3B2	0.193127	0.00879918
KLHL42	0.889713	0.00130388
GNAS	0.0302481	0.310395
DNM1L	0.518126	0.0592627
PTHLH	2.96904	0.00300462
ERGIC2	0.0146559	0.927629
AURKA	-0.0978525	0.260276
PIR	-0.340567	0.0253549
AAMDC	-0.373166	0.0662627
RFX2	-0.418043	0.0183847
METTL2A	0.12566	0.144901
ALG6	-0.260995	0.164339
CNOT3	0.206169	0.0123284
PTPN4	-0.0187241	0.910906
DDX18	0.312938	0.00928569
KHSRP	0.180771	0.00441366
GNA11	0.12828	0.0314561
ASAP3	-0.650196	0.00334812
EDEM2	-0.388971	0.0207535
DNMT3B	-0.193196	0.119863
TPX2	-0.735213	0.000846303
PDRG1	-0.0310648	0.756009
EPB41L1	0.520824	0.0212428
DOCK9	0.335623	0.211565
ANKRD10	0.147393	0.256591
TGDS	-0.290744	0.121835
C3orf18	-0.979514	0.00996629
COQ9	-0.566357	0.00754993
KIF9	0.420762	0.336626
CRLS1	0.0133554	0.932482
PPP1R13B	0.654756	0.0145345
ATRN	0.196276	0.0178856
SMOX	1.695	0.0029564
FKBP1A	0.397715	0.150781
NSFL1C	0.20817	0.0313316
SLC4A11	0.842857	0.0103081
C20orf194	0.0502596	0.791969
ZNF343	0.0864801	0.404179
EBF4	-0.174576	0.027658
CPXM1	0.0298398	0.573638
MAVS	0.0679087	0.387563
LZTS3	-0.266586	0.208532
XRN2	0.147888	0.0361644
PLK1S1	-1.34799	0.0102981
DYNLL1	-0.240816	0.320602
TESC	0.055077	0.626617
SNX5	-0.189395	0.203468
RPL6	-0.119852	0.474625
MAPKAPK5	0.399894	0.0067676
P2RX7	-1.79495	0.00620824
ESF1	0.0350569	0.632336
RBBP9	-0.33858	0.0432135
ANAPC5	-0.0897288	0.380482
SLC23A2	0.277216	0.0279596
SLC8B1	-0.279102	0.220776
TMEM230	-0.737312	0.00176474
DZANK1	-0.0158576	0.95249
KDM2B	-0.0777633	0.274528
C20orf26	-0.567618	0.225676
TASP1	0.412023	0.0527768
OAS1	-0.220652	0.0067094
GCN1L1	0.00250205	0.939089
RPLP0	-0.209379	0.15074
PXN	0.944723	0.000645696
SIRT4	-1.50932	0.081507
KIF16B	0.291389	0.105195
TRMT6	0.672309	0.00319827
CHGB	1.29426	0.011649
PEBP1	-0.188181	0.00673293
BRAP	0.0285575	0.756891
ERP29	-0.503383	0.00143397
FUS	0.267227	0.00228323
IGBP1	-0.101333	0.281244
ZNF302	-0.19051	0.356318
GRAMD1A	-0.637604	0.00110004
CDIP1	-0.124939	0.57498
KCNH4	0.948331	0.00372164
GANAB	0.0899492	0.0188078
GMIP	-0.516499	0.0113041
RBM41	0.485807	0.00881641
BIRC5	-0.480063	0.303681
LAG3	0.352462	0.154716
MLF2	0.194291	0.0803745
OTUB2	-0.175687	0.499145
DDX24	0.290792	0.0120522
ZBTB25	-0.570866	0.00937502
NECAP1	0.265161	0.0369742
ARHGAP4	-0.313343	0.0354096
ANKRD24	-1.05782	0.0090124
DHX32	0.159425	0.109584
RCOR1	1.03083	0.000335755
GPATCH2L	0.507702	0.00379992
LTBP4	-0.191319	0.00635845
BLVRB	-0.182851	0.43961
SLC9A1	0.615254	0.00593756
SPTLC1	-0.0389413	0.71598
PAPOLA	0.0873546	0.0622974
CCNK	0.0453068	0.403578
PCBP4	-0.290922	0.0524532
YPEL3	-1.79006	0.000436601
MRPS33	-0.0327769	0.692099
NDUFB2	-0.210945	0.0893225
NUDC	0.127632	0.0486118
MAEA	-0.245394	0.377337
ICAM1	1.22148	0.00414039
STRN4	0.0437502	0.594359
MUL1	0.143931	0.124171
TFAP4	-1.12993	0.0136711
PDCD7	0.13987	0.0689008
SPG21	-0.376826	0.00954337
DNAJB11	0.360268	0.00383538
LEPREL1	1.79865	0.000814872
FLT3LG	-0.43069	0.031171
RAB11FIP3	-0.0947185	0.114244
GNPTG	-0.536175	0.00419179
ZNF268	0.23746	0.327723
GOLGA3	0.299574	0.00511958
PABPC4	-0.0668663	0.390099
CERS4	-0.47143	0.0134174
MCOLN1	-0.330406	0.0345976
USP48	-0.092191	0.201659
EFNB1	-0.718338	0.000424433
PDPR	-0.244017	0.0212135
AARS	-0.278352	0.0101868
GLG1	-0.436904	0.018902
KIF4A	-0.257486	0.038529
TNRC6A	0.38186	0.00194566
FCGBP	-0.614983	0.0211212
PLEKHG2	1.01748	0.00281503
DLL3	-0.530856	0.00300462
NAT14	-0.453506	0.0092711
PITPNM2	1.82945	0.00045658
EXOC1	-0.0397443	0.697299
RBM27	0.541796	0.00600271
OSBPL8	0.450678	0.0023014
DTX2	-0.00416528	0.989819
PUS7	0.556644	0.00162682
NRCAM	1.01235	0.000473767
LAMB1	0.243833	0.00343885
DLD	-0.0296307	0.72584
WDR7	0.172735	0.323094
TXNL1	0.167846	0.222375
ABCC6	-0.829922	0.0132936
CMTM6	-0.0702155	0.315275
ITGA6	1.1104	0.0318754
RAPGEF4	0.48622	0.0974569
MLTK	0.0387399	0.933976
FH	-0.0496267	0.485618
TF	-0.191481	0.323088
CDV3	0.672929	0.0159937
MYO15A	0.421201	0.00194564
ALKBH5	0.147658	0.022125
NLRP1	-0.0439754	0.535136
PITPNM3	4.61265	0.00085862
SPAG7	-0.231688	0.0463705
ORC6	-0.326208	0.0365009
ZFHX4	-0.13921	0.231669
ZC3HC1	-0.0179558	0.935814
RGS17	2.24569	0.0011609
ANGPT2	0.252112	0.783084
TMEM101	-0.725065	0.00513927
CD200	-0.994639	0.0299543
CCDC80	-0.780469	0.000775875
PSME1	-0.239919	0.0443957
PPP2R3C	-0.0150978	0.89299
HAUS4	-0.339461	0.0787279
JPH4	-0.344558	0.393375
MYH7	0.150845	0.243627
OSGEP	-0.151847	0.09579
SLC22A17	-0.239401	0.0420768
RNF31	0.403879	0.103698
SCFD1	0.335131	0.0229434
G2E3	-0.30533	0.0932581
HECTD1	0.400831	0.0148464
HNRNPC	-0.173872	0.105321
SUPT16H	0.0569165	0.266459
TOX4	0.294147	0.057575
GEMIN2	0.270251	0.140486
TGM1	0.525897	0.0873539
TINF2	0.221155	0.199317
SEMA6A	0.389873	0.226479
TRPM7	-0.0566579	0.483125
TYRO3	-0.387091	0.0033118
WDR76	0.168725	0.061216
CAPN3	-1.06166	0.071622
SNAP23	-1.01527	0.00711721
PHGDH	-0.368937	0.000823928
COL9A3	0.0564684	0.25616
EZR	0.137738	0.0123284
MYL6	-0.17316	0.623355
AGO1	0.368682	0.00328809
TEKT2	-1.12035	0.0104556
CLSPN	0.242557	0.024828
RFFL	1.54654	0.000460953
UNC13D	-0.899763	0.0646418
MFSD11	0.107645	0.433465
DPYSL2	-0.531741	0.00121348
TGFB2	-1.98009	0.000497844
GPATCH2	0.485725	0.0165165
NUP50	0.317047	0.0047874
CDC45	-0.338383	0.0171243
COMT	0.0749063	0.852548
CECR1	-0.738433	0.00535725
XXbac-B461K10.4	2.48584	0.0011609
ECHDC1	0.509292	0.0392042
LRRFIP2	0.524683	0.00507406
SEC22C	0.00929489	0.876858
XYLB	-0.00425411	0.990004
HDAC6	-0.324025	0.239924
CDC6	0.368442	0.015426
UPRT	-1.77093	0.0067676
CDC23	0.05698	0.482033
AAAS	-0.0670631	0.576685
CBX5	0.0304031	0.395091
SUCO	-0.0781287	0.336816
MSH2	0.551951	0.00182272
MAP3K1	0.606928	0.000965313
DHPS	-0.180409	0.0938325
HOOK2	-0.722726	0.00278372
ARCN1	0.173438	0.0631988
EPB41L4B	0.240635	0.0718301
TMEM38B	-0.0116745	0.913811
PSMD5	-0.0240542	0.743424
NUP188	0.346881	0.00304839
CRAT	0.00397728	0.958318
NANS	-0.0925418	0.211361
TBC1D2	-0.834792	0.0265331
DFNB31	-0.0405086	0.524909
CWF19L1	0.20158	0.132041
SEMA4G	0.153371	0.316223
BTAF1	0.867963	0.000518643
IKZF5	-0.335803	0.0435382
TLL2	-1.09072	0.0227612
SORBS1	0.269753	0.0605944
BAMBI	-0.369239	0.0780078
IL11	4.05707	0.00110934
WAC	0.141456	0.0203541
CREM	0.167053	0.452924
NUBP2	-0.488174	0.0193257
HIVEP1	0.827376	0.113135
FKBP5	0.787777	0.000749463
SRPK1	0.187349	0.0175211
BRPF3	0.0255001	0.893053
MRPS18A	0.039498	0.674288
TMEM14A	-0.246444	0.218578
EFHC1	0.837568	0.00289484
HSP90AB1	0.0677323	0.0329748
CDC5L	0.117526	0.0632194
ZNF184	-0.854555	0.00478919
SIRT1	-0.00239605	0.972086
HNRNPH3	-0.567102	0.000540185
IFT74	-0.458797	0.0128737
JAK2	0.87903	0.00702121
ABL1	-0.698278	0.000452914
ACOT7	-0.118565	0.0700351
SH3GLB1	0.432609	0.00309837
CDC7	0.246848	0.131984
SYDE2	1.29035	0.0396803
SCD	0.0296991	0.176741
TMED1	-0.549479	0.108451
ABLIM1	1.35905	0.00833779
ERMP1	-0.334775	0.0649392
RAB18	0.116229	0.134685
NRP1	-0.340386	0.43988
HSD17B7P2	0.264061	0.166824
PRTFDC1	0.0285292	0.666682
TSPAN15	-0.230324	0.162298
H2AFY2	-0.327443	0.26814
FAM21A	-0.488282	0.00490415
MAST3	0.108025	0.169368
MZF1	-0.0782606	0.430512
OCEL1	-0.158742	0.497745
MYO9B	0.348594	0.00156723
PSMD8	0.312777	0.00405847
FBXL19	0.0611056	0.428845
STX1B	0.398647	0.0133349
HSD3B7	0.553425	0.118052
SETD1A	0.164053	0.0172906
BCL7C	-0.364548	0.0179535
EFNA2	-0.756651	0.0368521
CIRBP	0.268173	0.0558324
ATP5D	-0.14256	0.208161
C19orf26	0.408339	0.0140489
HNRNPM	-0.137501	0.0213585
2019-03-02	-0.558217	0.0564694
NDUFB7	-0.328625	0.0151859
TECR	-0.113008	0.0713713
TIMM13	-0.13115	0.0347527
CDC34	-0.15919	0.0359204
MTAP	0.274445	0.060842
CEP170B	1.46838	0.000227991
POLR2E	-0.0253109	0.65866
POLRMT	-0.0258643	0.540077
HCN2	0.906881	0.0209802
IZUMO4	-0.243039	0.401109
RASSF7	-0.538587	0.247783
GADD45B	0.539621	0.103281
PALM	-0.298539	0.00980927
MADCAM1	-0.914917	0.0617609
IGF2-AS	0.288323	0.133095
MKNK2	0.102496	0.0787711
ARVCF	-1.19446	0.000288019
TRMT2A	-0.375259	0.0449415
RANBP1	0.0518264	0.196146
ZDHHC8	-0.192222	0.0153842
KLHL22	-0.210263	0.0355871
MED15	0.250874	0.0286424
SNAP29	0.108293	0.158124
CRKL	0.0269169	0.42573
LZTR1	-0.306961	0.0431915
MMP11	-1.0327	0.0109922
CECR2	-0.186885	0.140574
SMARCB1	-0.2937	0.0970353
P2RX6	-0.116181	0.564887
DERL3	-0.681789	0.00560231
BCL2L13	0.362009	0.0168019
DDTL	0.485166	0.183711
DDT	0.154031	0.224228
GSTT2	-0.279159	0.232885
CABIN1	0.056589	0.194872
TBC1D10A	0.391396	0.0209685
SUSD2	1.86921	0.187168
SF3A1	0.259575	0.00427569
RNF215	-0.176632	0.139716
SEC14L2	0.66259	0.0963893
SPECC1L	-0.265939	0.142382
PPIL2	0.0588831	0.433731
YPEL1	-2.33324	0.000344847
SNRPD3	0.0878294	0.573061
PES1	0.361783	0.0153368
MAPK1	0.372336	0.00301781
GGT1	-0.250552	0.224164
PRODH	-1.2975	0.00902856
PPM1F	-0.134079	0.27394
SLC35E4	1.47589	0.000709615
TOP3B	-0.140579	0.484722
DGCR14	-0.0215975	0.873272
CRYBB2P1	-0.0972555	0.468819
MFNG	-1.23696	0.0117693
CARD10	2.10547	0.000292854
LRP5L	-0.319933	0.519993
SLC25A1	0.0272088	0.780597
ADRBK2	-0.074714	0.469507
PLA2G3	0.0536995	0.616007
GGA1	-0.0308456	0.706054
HIRA	-0.000864451	0.992383
SH3BP1	1.1681	0.00111008
SEZ6L	1.56257	0.00164235
LGALS1	0.0523166	0.223275
HPS4	-0.443339	0.0361561
PIK3IP1	-1.90736	0.00981724
NOL12	0.223174	0.0406076
SRRD	-0.186467	0.222019
PATZ1	-0.580867	0.000877421
TRIOBP	-0.197099	0.0562353
TFIP11	-0.151303	0.0976722
GCAT	-0.759051	0.00620933
CRYBB1	2.38835	0.0152236
ANKRD54	0.117264	0.259051
EIF3L	-0.0795487	0.14376
NHP2L1	0.408189	0.0259895
MICALL1	0.5197	0.00212503
POLR2F	-0.2474	0.00636863
CCDC134	0.351526	0.0410473
DEPDC5	-0.0809675	0.35527
TTC28	0.174535	0.0342366
CENPM	-0.487133	0.0090408
2019-09-03	-0.0585476	0.168217
KDELR3	0.0477647	0.865336
CYP2D6	-0.253739	0.50928
DDX17	0.241878	0.00385338
TCF20	-0.556529	0.00450189
HSCB	-0.491483	0.0350397
CBY1	-0.346176	0.0307175
TOMM22	0.0131477	0.858635
XBP1	0.433455	0.129308
RTCB	0.11918	0.0589583
JOSD1	-0.229955	0.0100048
FBXO7	-0.0165525	0.861453
GTPBP1	0.0369497	0.443501
POLDIP3	-0.0874077	0.0785665
RAB36	0.659344	0.00352875
TIMP3	1.00307	0.0257542
PPP6R2	-0.249116	0.0170664
SBF1	0.145624	0.0214632
SUN2	-0.200115	0.0348579
CYB5R3	0.183386	0.0597197
DNAL4	-0.599415	0.0186854
LMF2	0.22024	0.00862583
RHBDD3	-0.39028	0.0206775
PACSIN2	-0.0780574	0.278981
TTLL1	-0.603393	0.0636744
AP1B1	0.160559	0.0252909
HMGXB4	0.229661	0.0573878
TOM1	-1.02479	0.00385061
CHKB	0.325626	0.0473162
HMOX1	-0.490125	0.103591
MCAT	0.113105	0.257844
THOC5	-0.348068	0.00534863
MCM5	-0.280849	0.00344629
ARSA	0.0980354	0.256934
TSPO	-0.396139	0.00611817
RASD2	-3.72624	0.000573389
TTLL12	-0.474848	0.000922389
CBX7	-2.97949	0.00201779
PDGFB	3.35178	0.000816214
CABP7	-2.14628	0.000916573
RPL3	-0.261616	0.0083582
ZMAT5	-0.287545	0.0229903
RBFOX2	-0.0570949	0.338332
SYNGR1	0.0239466	0.79149
TAB1	-0.482214	0.00236315
ASCC2	0.312965	0.0155283
MTMR3	-0.0614958	0.390627
MIEF1	0.485763	0.00298934
APOL4	1.81484	0.0183847
APOL1	-1.19097	0.19563
PNPLA3	0.187843	0.2325
MYH9	1.17697	8.89335e-05
CACNA1I	1.12531	0.0167385
SAMM50	0.0763288	0.309675
TXN2	-0.130606	0.480084
FOXRED2	-0.381241	0.0451424
EIF3D	0.20039	0.0199241
TNRC6B	-0.313052	0.00665755
SGSM3	-0.395919	0.00524911
IFT27	-0.241968	0.0638076
KIAA0930	0.325353	0.0991577
SLC25A17	0.342988	0.295325
FAM118A	0.312818	0.0609024
KCTD17	-0.0368784	0.583392
ST13	-0.255856	0.0113603
RBX1	-0.24616	0.0196961
EP300	0.837729	0.000405686
L3MBTL2	0.116178	0.497862
CHADL	0.0356768	0.909212
RANGAP1	-0.433543	0.00686178
ZC3H7B	0.0742714	0.0651193
PHF5A	0.131861	0.204309
ACO2	-0.105467	0.166582
POLR3H	0.140892	0.0640898
TRMU	0.0962142	0.269793
PMM1	-0.260543	0.156511
DESI1	0.093507	0.208123
CERK	-0.565243	0.00814591
BRD1	-0.271315	0.169018
ZBED4	-0.233714	0.00857375
MLC1	-0.323175	0.00238755
HDAC10	-0.20684	0.18967
KCNK10	1.2162	0.00126408
ABHD4	-0.798401	0.00344873
KHNYN	-0.323448	0.0150612
FKBP3	-0.70846	0.00209525
SDR39U1	-0.320585	0.0167901
RBM23	-0.424363	0.156585
PRMT5	-0.183119	0.0408015
AP4S1	0.375943	0.220046
POLE2	-0.0783992	0.547149
VCPKMT	-0.0646617	0.847632
SOS2	0.024086	0.831944
CDKL1	0.352184	0.118933
NIN	0.0802952	0.135555
PYGL	0.106926	0.0919989
TRIM9	0.933332	0.000308727
PSMC6	0.108755	0.203805
GNPNAT1	0.680292	0.00229847
DDHD1	1.06897	0.00832682
CDKN3	-0.124924	0.272514
CNIH1	0.193487	0.119976
CGRRF1	-0.291913	0.519351
ATP6V1D	0.0855717	0.823416
PIGH	0.034177	0.790687
PSMA3	-0.00415179	0.956457
VTI1B	0.197504	0.083446
TIMM9	0.338844	0.0632194
GSTZ1	-0.280584	0.0444994
KIAA0586	-0.782723	0.00518778
TMED8	0.3172	0.0127598
AHSA1	-0.0856718	0.239544
DAAM1	-0.697102	0.00805493
ISM2	-0.740989	0.0402762
SPTLC2	0.218448	0.0124199
LGMN	0.225084	0.0521023
ALKBH1	0.496237	0.0121665
SNW1	-0.0525877	0.488217
CHGA	0.0882282	0.660861
ITPK1	-0.0348919	0.808845
DHRS7	0.0301799	0.826776
PPM1A	-0.00204781	0.982598
SIX4	0.295775	0.0454668
GALNT16	0.311873	0.0594882
ASB2	2.07987	0.0297576
CEP128	0.0973534	0.430098
ERH	-0.136704	0.0276474
HIF1A	0.885917	0.000359035
KIAA0247	-0.719424	0.0018019
SRSF5	0.142246	0.0561621
EIF5	0.338325	0.562291
DICER1	0.575211	0.0167682
ZFYVE21	0.171396	0.175992
MTHFD1	0.113663	0.0437435
ZC3H14	0.361579	0.00694373
TELO2	-0.138363	0.102477
PCNX	0.94697	0.00145666
GSKIP	-0.241332	0.142957
VRK1	0.203608	0.0480109
PSMC1	0.263451	0.0111433
PAPLN	-0.589305	0.107137
RPS6KA5	-0.541406	0.0230903
SMEK1	0.179163	0.144756
C14orf93	-1.27279	0.001445
PSMB5	-0.567654	0.101607
YY1	-0.0960605	0.634875
ACIN1	-0.32557	0.00361019
CCNB1IP1	-0.0288099	0.812645
TRIP11	0.207985	0.070937
APEX1	-0.749913	0.173517
PABPN1	-0.128198	0.0297944
EFS	-0.732927	0.00309837
ARHGAP5	-0.113805	0.780321
CINP	-0.104178	0.795091
DHRS2	-0.63528	0.180913
SRP54	0.20502	0.0904489
CHD8	0.0678944	0.381868
PCK2	-0.209726	0.153582
KIAA0391	-0.548579	0.211637
DCAF11	-0.394772	0.0105533
PSMA6	-0.199454	0.319023
NFKBIA	-0.0699874	0.353603
EMC9	-0.240163	0.123135
PSME2	-0.0168303	0.865336
BRMS1L	-0.189857	0.234525
REC8	-0.244319	0.00628219
TM9SF1	0.0499924	0.618269
SEC23A	0.218882	0.0363662
GMPR2	-0.619622	0.0142695
PNN	0.393457	0.00193013
RABGGTA	0.0500139	0.583509
NFATC4	-0.706718	0.00681261
PLTP	-0.150149	0.147338
PCIF1	-0.432287	0.00639613
GSS	-0.0159321	0.822196
TRPC4AP	-0.500178	0.00363158
PYGB	0.28898	0.0027849
ABHD12	0.113064	0.180493
GINS1	0.0392282	0.705093
NINL	-0.590614	0.0260271
UQCC1	0.184135	0.0583018
ZMYND8	-0.149032	0.0646656
IFT52	0.0668096	0.617697
MYBL2	0.0345338	0.488413
NDRG3	0.480253	0.00763084
C20orf24	0.141501	0.102837
NFATC2	4.90493	9.13306e-05
RIMS4	0.106927	0.0359204
PABPC1L	-0.0737562	0.379016
STK4	0.993555	0.00219579
ADNP	1.44799	0.000263368
PFDN4	-0.229245	0.0796311
CSTF1	0.180826	0.0654058
BMP7	-0.96734	0.000283562
RAE1	-0.21472	0.0434129
TPD52L2	-0.146907	0.0424645
DNAJC5	0.242884	0.00591259
NELFCD	-0.124717	0.175322
PRPF6	-0.304425	0.00362158
SLMO2	0.060452	0.285549
HRH3	-2.95906	0.00191884
MTG2	-0.436458	0.0410009
PSMA7	-0.169318	0.0129436
SLCO4A1	-0.213037	0.0524532
NTSR1	-0.224507	0.491925
MRGBP	0.0454368	0.577662
TCFL5	-0.465372	0.00622894
DIDO1	0.39703	0.00206054
GID8	0.241597	0.0427303
NKAIN4	0.157991	0.192652
ARFGAP1	-0.95875	0.000590261
COL20A1	0.110566	0.0695136
EEF1A2	-0.273812	0.00131047
GMEB2	0.155612	0.0475571
C20orf27	0.0107667	0.830885
CDC25B	-0.975722	0.000335755
RNF24	0.244459	0.0345999
ARFRP1	-0.0128938	0.905684
NDUFAF5	0.0130468	0.933854
TRIB3	0.784559	0.0141993
RASSF2	0.159641	0.0996023
CSNK2A1	0.181443	0.0165674
CDS2	-0.129583	0.0519793
HM13	-0.125334	0.246599
MYLK2	0.840984	0.0582058
SEC23B	0.188259	0.134354
PLCB4	0.321267	0.0452072
TM9SF4	0.260125	0.476455
CRNKL1	-0.371876	0.0153459
POFUT1	0.257486	0.0132208
SAMHD1	-0.14873	0.00773532
KIF3B	0.410735	0.00364749
MROH8	-0.381641	0.241456
NOP56	0.176838	0.011223
MANBAL	-0.245426	0.213549
IDH3B	0.0675485	0.315258
MAPRE1	0.388596	0.00136695
JAG1	1.78726	9.13306e-05
CDK5RAP1	0.0872942	0.366292
SNTA1	-0.274855	0.111803
TTI1	-0.444358	0.0133483
E2F1	-0.667329	0.000615559
RPRD1B	0.356929	0.027495
PXMP4	-0.719944	0.0200639
CHMP4B	-0.0244301	0.733197
CST3	-0.0629001	0.133171
ACTR5	-0.260411	0.0761902
AHCY	-0.0142618	0.713867
FAM83D	-0.251764	0.0534617
DHX35	0.237254	0.109521
DNTTIP1	-0.171346	0.07184
MAP1LC3A	-0.568721	0.0934745
PIGU	-0.176431	0.173421
ACOT8	-0.244706	0.0942538
APMAP	-0.063203	0.136397
ZNF516	-0.861849	0.0637142
ADNP2	-0.30801	0.78278
RBFA	-0.224894	0.105252
USP14	0.562143	0.075366
VAPA	0.305235	0.00807333
METTL4	-0.481383	0.112178
LPIN2	-0.776987	0.00133427
SMCHD1	-0.250697	0.00505307
MYL12A	0.883159	0.00312081
CEP76	-0.232388	0.0933055
ST8SIA5	0.0589718	0.781779
[truncated: 12,592 more rows]

## Sheet: FDR<0.05
Gene Symbol	log_Fold_Change	FDR
VGF	3.54137	2.18497e-05
FAM49A	1.0637	2.18497e-05
TNFRSF12A	4.87607	5.21194e-05
TNC	1.66229	5.21194e-05
IFI6	-0.670395	5.21194e-05
EGFR	1.1611	5.21194e-05
PCDH19	2.07249	5.21194e-05
PTRF	2.87278	5.21194e-05
FLNA	1.12222	5.21194e-05
ITGB8	1.82445	5.69003e-05
KCNF1	3.16688	5.69003e-05
TRIB2	1.31396	8.45326e-05
BCAN	-0.749248	8.45326e-05
MT-RNR2	-0.272215	8.45326e-05
MYH9	1.17697	8.89335e-05
NES	0.90309	8.89335e-05
PHLDA1	1.60405	8.89335e-05
SPRED1	2.28117	8.89335e-05
CSPG4	1.76381	8.89335e-05
B4GALT5	1.38087	8.9937e-05
NFATC2	4.90493	9.13306e-05
JAG1	1.78726	9.13306e-05
CCND1	1.91174	9.13306e-05
STAT1	0.697191	9.13306e-05
ILDR2	1.59636	9.13306e-05
MARCKS	-0.913965	9.13306e-05
SCG2	1.91238	9.13306e-05
PCDHGC3	1.07191	9.13306e-05
MYCN	-0.720502	0.000100574
WARS	1.56575	0.000100574
FOSL2	2.46012	0.00010286
MIAT	1.2025	0.00010286
ZNF469	2.33146	0.00010431
WWTR1	1.31761	0.000109216
SYNPO	3.0865	0.000109216
PHLDA2	4.06635	0.000109216
PEG10	0.981451	0.000109216
SOX8	-2.03362	0.000117416
BMF	-4.07582	0.000117416
CLIP2	1.56181	0.000117416
FLNC	4.06071	0.000117416
ZYX	2.31785	0.000117416
RPS6KA3	1.63411	0.000117416
LZTS1	1.62196	0.000119764
CAMK2A	3.51779	0.000119764
CKB	-0.634901	0.000119764
BAI1	1.61634	0.000119764
ETV5	2.09981	0.000119764
IDS	1.68519	0.000124465
DOT1L	1.17529	0.000124465
WDR1	1.33001	0.000129645
ACTB	0.702058	0.000129645
ITGA7	1.35569	0.000129645
MAP1B	0.986869	0.000134485
MYCL	-2.4793	0.000136998
METTL7B	5.27878	0.000136998
HES5	-2.63606	0.000137303
SH2B3	1.94874	0.000139284
COL6A1	0.813365	0.000139284
NR2F1	-1.40393	0.000139284
ARC	2.62602	0.000139284
FOXO6	-1.46189	0.000142427
ACTN1	1.57995	0.000142761
CLCN7	-1.27778	0.000142761
CDKN2C	-1.37344	0.000142761
SOX4	-0.70439	0.000142761
RSAD2	0.688289	0.000142761
STK32B	1.66317	0.000142761
GAP43	2.49294	0.000142761
KIAA1211L	2.39198	0.000142761
DLL1	-2.01354	0.000142761
PIK3C2B	-1.57162	0.000146336
SYT12	4.0413	0.000146336
SH3BP5L	-1.69955	0.000146336
GPC1	0.609367	0.000147271
HR	1.84556	0.000147271
GADD45G	-1.75723	0.000148845
TTYH3	0.575411	0.000149322
NUMBL	1.25804	0.000153678
ANXA1	2.5096	0.000153678
TMEM158	1.46833	0.000157951
UBASH3B	1.54119	0.000159418
GADD45A	1.60961	0.000161297
ATXN1	2.3696	0.000161297
PDLIM4	2.11143	0.000161297
SLC7A1	1.01662	0.000164037
H19	0.625331	0.000165071
LMNA	2.12494	0.000165746
LAMC1	1.03419	0.000169631
ARHGAP29	2.24803	0.000172903
EXTL3	-2.50365	0.000177195
EPHA2	1.47674	0.000177195
H1FX	-0.745529	0.000177195
RCOR2	-1.36166	0.000178009
UBTD1	1.62401	0.000187124
DNMBP	1.83501	0.000196482
CCL2	1.98853	0.000196482
STK40	1.15318	0.000200772
HIPK2	0.81817	0.000205951
APOL6	0.934337	0.000208079
ADCYAP1R1	-1.59129	0.000216511
CTGF	2.43269	0.000216511
ENC1	0.707727	0.000216511
FOSL1	3.08772	0.000216511
LONRF2	2.68702	0.000224848
EGR1	2.84666	0.000226525
S100A2	4.14187	0.000226525
SEMA3A	1.24005	0.000227991
CEP170B	1.46838	0.000227991
DUSP5	2.21558	0.000227991
FAM131B	1.53281	0.000227991
KMT2D	0.89069	0.000227991
ADCK3	-1.69163	0.000233674
GBP1	1.02385	0.000236204
JUN	0.95356	0.000236204
SOX12	-0.785729	0.000237391
ITPKC	1.60971	0.000238273
POU3F3	-0.985359	0.000239676
CAMK2D	1.77011	0.00024423
DDIT4	-0.957151	0.00024423
EEF2	-0.314009	0.000250829
CDK6	0.6803	0.000251465
GLCCI1	-1.05682	0.000251465
SHROOM2	2.24879	0.000251465
RNF213	0.43715	0.000251465
MALAT1	-0.623666	0.000251465
IL6R	4.8596	0.000253008
ARSI	2.88467	0.000253008
FAM129B	1.27931	0.000256669
PFKP	0.992222	0.000263368
ADNP	1.44799	0.000263368
ZBTB18	-1.19047	0.000264021
ETS1	2.9595	0.000270016
AUTS2	1.46713	0.000270016
RUNX1	1.54125	0.000270034
PARP14	0.764565	0.000270034
COL4A1	0.812057	0.000273453
PTPN14	1.41484	0.000274849
SLC38A1	0.722997	0.000274898
RFTN2	-2.52244	0.000274898
CXXC11	-1.01671	0.000274898
C21orf62	2.85361	0.000274898
SYNJ2	2.02323	0.000280467
TRIO	1.18529	0.000280468
ITGAV	1.2376	0.000282163
CENPF	-0.944081	0.000282388
ROCK2	1.00174	0.000282388
BMP7	-0.96734	0.000283562
RASSF8	1.80034	0.000283562
TOP2A	-0.811047	0.000283562
GPR153	1.20547	0.000283562
HIPK1	1.44274	0.000283562
DDX21	0.867817	0.000283562
DCP2	-1.94964	0.000283562
PHLDA3	1.30185	0.000283562
ARVCF	-1.19446	0.000288019
BIRC6	1.03797	0.000288019
DHCR24	0.836041	0.000288019
CYR61	2.61014	0.000288019
NFIB	-1.01113	0.000288019
PLXNB2	0.623866	0.000288019
TMTC1	1.62672	0.00028979
ADAMTS4	1.00862	0.000289937
SPRED3	3.30469	0.000289937
FTL	-0.560123	0.000292854
CARD10	2.10547	0.000292854
SIPA1L2	1.45867	0.000292854
MAN1C1	1.03002	0.000292854
SIX5	-1.43153	0.000292854
SPRY4	2.33123	0.000292854
MICALL2	2.17647	0.000305174
MT-ND5	0.308119	0.000305174
FAM19A5	1.00405	0.000306286
TRIM9	0.933332	0.000308727
XIRP1	5.25622	0.000308727
ETV4	2.48581	0.000308727
BEGAIN	2.66574	0.000308727
MAP2K3	1.93737	0.000309432
S100A16	2.14937	0.000309432
SMOC1	-0.598515	0.000309432
RXRA	-0.985593	0.000315268
CSPG5	-0.768495	0.000334477
NKTR	2.34886	0.000334477
AHNAK	2.41942	0.000334477
UBALD2	-1.04864	0.000334477
UBE2J1	1.33656	0.000334477
MNT	-1.33281	0.000335755
RCOR1	1.03083	0.000335755
CDC25B	-0.975722	0.000335755
ASPHD2	1.88363	0.000335755
ATP13A3	1.24211	0.000335755
CRB2	-0.802734	0.000335755
PBXIP1	-1.01432	0.000335755
STAT2	-0.648828	0.000335755
SOCS3	1.98145	0.000335755
LDB1	-0.850484	0.000335755
YPEL1	-2.33324	0.000344847
GPM6A	-0.503114	0.000344847
UHMK1	1.07869	0.000344847
MN1	-1.70824	0.000344847
NUMA1	-1.03152	0.000345972
PRKAR1B	1.04685	0.000345972
MT-ATP6	0.369679	0.000345972
TNK2	-0.934584	0.000346971
PRRC2C	0.830876	0.000346971
FAM178A	1.20347	0.000349525
PLXNA2	-0.967805	0.00035098
FBXO32	-2.56362	0.00035098
EPHB2	1.23246	0.000351992
VCL	1.29681	0.000358738
SEC61A1	-1.04125	0.000358738
KIAA1199	3.31052	0.000358738
CAPN2	0.939171	0.000358738
PGAM1	0.567085	0.000358738
CHRNA9	2.38597	0.000358738
DOK7	4.59762	0.000358738
EGR3	3.21202	0.000358738
THRA	-1.25562	0.000358894
SSBP3	-0.936084	0.000358894
HIF1A	0.885917	0.000359035
PTPRG	1.15009	0.000359035
METRNL	1.73567	0.000359035
ATP2B1	0.875262	0.000362166
HBEGF	3.04402	0.000362166
FREM2	1.07643	0.000363931
KIAA0947	0.904387	0.000363931
DCBLD2	1.38761	0.000364746
SMS	0.503267	0.000364746
EHD4	1.01143	0.000364746
SDC4	1.85351	0.000364746
LIF	2.64152	0.000364746
DCLK1	2.56835	0.000364746
RPL13A	-0.491132	0.000364746
COLGALT2	-0.659034	0.000364746
POM121B	2.1111	0.000364746
MIR3648	-1.10826	0.000364746
ACSS1	-0.87039	0.000365405
NACC2	0.926258	0.00036742
SH3PXD2B	0.720082	0.0003698
IFIT2	0.618441	0.000373815
ANXA2	1.08091	0.000373815
PSAP	-0.368298	0.000374493
LGR5	-1.52319	0.000376334
MYO10	-0.607981	0.000378892
HAP1	2.13555	0.00038545
KLF5	2.49331	0.000390564
CSRNP1	1.90266	0.000390564
KLF15	-3.4209	0.000390564
A2M	0.84605	0.000390564
MX2	0.664736	0.000390564
LIMD1	0.579127	0.00039227
GPR3	2.9526	0.00039227
SPHK1	2.02423	0.000393524
CLDN5	-2.39763	0.000395778
GPR158	2.99726	0.00039961
UBE2H	-0.918886	0.000400248
EP300	0.837729	0.000405686
RALGDS	-0.950966	0.000408957
FAM65B	2.1344	0.000412108
RGS6	2.89099	0.000412108
TRRAP	0.770515	0.000413758
ITGA3	1.81426	0.000413861
RNF19A	1.66695	0.000413861
RRM2B	1.99445	0.000413861
NOVA2	-1.11711	0.000413861
FAM196A	2.89401	0.000416835
MAOB	0.844037	0.000417944
ISG15	-0.17624	0.000418806
CITED2	-0.845829	0.000420389
MT-CO1	0.142965	0.000420389
MED12L	1.75717	0.000420751
EFNB1	-0.718338	0.000424433
LRP5	-0.708895	0.000424433
TRAM2	0.831308	0.000427683
FZD5	1.30386	0.000427683
TCF4	-0.45549	0.000427683
ELF4	2.22075	0.000429713
DUSP4	0.759531	0.000429713
PDZRN3	-1.14898	0.000429713
ZNF365	3.30202	0.000430228
KLHL21	-0.833704	0.000433003
NUFIP2	0.8323	0.000434178
YPEL3	-1.79006	0.000436601
AC093673.5	2.68666	0.000438773
FAM222A	-0.796416	0.000446355
H1F0	-0.948646	0.000446355
MCL1	0.518593	0.000451608
CXCL11	1.36589	0.00045197
ABL1	-0.698278	0.000452914
KLHL24	-1.91517	0.000452914
THBS1	3.54463	0.000455155
LYST	2.56768	0.000456324
PITPNM2	1.82945	0.00045658
PPP1R15A	1.27348	0.000459512
MPST	-0.823439	0.000459512
FAM171A2	-0.919447	0.000459512
STK10	1.16597	0.000460916
SRCAP	0.488915	0.000460916
TFPI2	2.13245	0.000460916
ZMIZ1	0.688429	0.000460916
GFAP	1.5175	0.000460916
LLGL1	-0.553486	0.000460916
KIF21A	-0.796805	0.000460916
ADAMTS15	1.67655	0.000460916
RPS9	-0.372919	0.000460916
ZMAT3	1.1915	0.000460916
PRPF8	0.426019	0.000460916
IGDCC3	-1.6688	0.000460916
RIN1	1.66131	0.000460916
SPRED2	1.21902	0.000460916
RPL39	-0.435714	0.000460916
AC069287.1	6.71474	0.000460916
RFFL	1.54654	0.000460953
NRCAM	1.01235	0.000473767
FZD2	-1.32456	0.00047555
HBP1	-1.50945	0.000479935
AMMECR1	1.20014	0.000480363
AGO2	1.23323	0.000482023
PDP1	1.00431	0.000485208
FEM1C	1.11692	0.000490862
POM121C	0.661139	0.000493865
NEK6	1.61016	0.000497412
MXD4	-0.739609	0.000497412
RPS11	-0.312794	0.000497412
PGM5	-1.63534	0.000497412
TGFB2	-1.98009	0.000497844
EIF1	0.705424	0.00050337
SPRY2	1.45867	0.000506998
RFX4	-1.11747	0.000508154
PHLPP2	1.39321	0.000509404
DGKG	2.36827	0.000509404
NACC1	0.642055	0.000512215
MID1IP1	-0.782181	0.000512215
SIPA1L1	0.836388	0.000515557
CUBN	2.36507	0.000516647
BTG1	-0.734666	0.000516647
FOXG1	-0.526751	0.000516647
FAM53B	-0.867572	0.000516647
S100A10	1.42313	0.000516647
MARCKSL1	-0.318919	0.000516839
BTN3A2	-1.1469	0.000516839
RHBDF1	1.82881	0.000518643
IGSF9	-1.06118	0.000518643
BTAF1	0.867963	0.000518643
FRMD4B	1.32072	0.000518643
ARAP3	0.976581	0.000518643
LGR6	2.8556	0.000518643
IQGAP1	0.772285	0.000518643
ABL2	0.827107	0.000518643
KCNN3	2.21497	0.000518643
YWHAZ	0.4728	0.000518643
CASP7	1.33629	0.000518643
POM121	0.687648	0.000518643
CBX4	-1.07178	0.000521063
FAM208B	1.12095	0.000522123
AKAP12	1.12648	0.000522123
SOX13	0.791203	0.000522123
AK4	1.066	0.000525921
CDC42	0.946772	0.000527408
EDA2R	2.17626	0.000530147
PCDH8	-2.37344	0.000531025
LMO4	-0.856762	0.000531025
RIF1	0.646337	0.000540185
HNRNPH3	-0.567102	0.000540185
SLC7A5	0.505576	0.000540185
SERPINE1	5.33198	0.000540185
CISH	2.72768	0.000540185
IGF2	0.554563	0.000540185
WDR81	-0.759386	0.000540185
CTSF	-0.8611	0.000540185
MT-CO2	-0.145287	0.000540185
SMC5	1.29649	0.000540185
PTCHD4	3.11823	0.000540185
CXCR4	1.19661	0.000560644
VMA21	0.724901	0.000560644
CNIH3	1.59877	0.000561958
CTTN	0.613956	0.00056554
GIGYF1	-0.493385	0.00056554
CBX2	-0.733279	0.000569457
JMY	-1.42017	0.000571
RASD2	-3.72624	0.000573389
KPNA1	0.945513	0.000573389
ARF6	0.939241	0.000573389
KCNK3	-1.4794	0.000573389
RCC2	-0.424766	0.000573389
NRARP	-1.0528	0.000573389
CD97	1.06962	0.000573472
RPL28	-0.389528	0.000575832
C2orf72	1.41964	0.000575832
ANKRD17	0.664967	0.000576491
CNN3	0.822575	0.000579149
CDON	-1.08258	0.000582065
IL27RA	1.90032	0.000582065
PLAU	1.94343	0.000582065
CKS2	-0.884023	0.000582065
IRF1	1.29068	0.000582065
CYCS	0.568616	0.000582065
MYD88	0.910475	0.000582065
PHLDB1	0.867154	0.000586572
SLC4A7	1.05442	0.000586572
FGFR3	-0.817466	0.000586572
CARS	0.970993	0.000586572
KMT2A	1.01879	0.000586572
ZNF317	1.20802	0.000586572
BCL2L11	-1.34237	0.000586572
ZNF788	-3.30394	0.000586572
PRKDC	0.637276	0.000586572
ARFGAP1	-0.95875	0.000590261
TGFB1	0.772229	0.000590261
ZC3HAV1	0.917157	0.000590261
CDKN1C	-1.55248	0.000590261
SFRP2	-1.29643	0.000590261
ARNT2	0.55927	0.000591533
TFEB	1.83422	0.000593721
EPHB3	-0.681881	0.000595048
PDGFA	2.09471	0.000603522
BMP8B	1.78361	0.00060621
NAV2	2.34686	0.00060621
EEF1A1P5	-0.374338	0.00060621
OTUD4	0.87515	0.000610469
NAV1	1.11557	0.000613606
DUSP6	3.1649	0.000613606
SHC1	1.07597	0.000613606
MLXIP	-0.605293	0.000613606
TEAD1	1.02256	0.000613606
RTN4	0.579611	0.000614113
E2F1	-0.667329	0.000615559
HMGCR	0.603147	0.000615559
SH3BP5	1.50529	0.000615559
STAC2	4.37199	0.000620391
NCK2	0.759798	0.000621542
FMNL3	1.61775	0.000621542
CHST2	1.9024	0.000621542
RPLP1	-0.350144	0.0006242
PLXNA3	0.49415	0.000635654
MALT1	1.26698	0.000635654
RP3-395M20.12	-1.79128	0.000635654
ARHGAP31	1.10394	0.000637434
LFNG	-1.50659	0.000637434
PXN	0.944723	0.000645696
EIF4H	0.45305	0.000645696
KRR1	1.09622	0.000645696
RRP1B	0.557059	0.000645696
MT-ND4L	0.494337	0.000645696
UBR4	0.55682	0.00065976
PLAT	2.38557	0.000661138
PLEKHG1	1.22466	0.000661138
COL4A2	0.374425	0.000661138
NBR1	-1.05355	0.000661138
TMEM33	-1.34723	0.00066431
PPL	4.27036	0.000668439
WIPI2	-0.613617	0.000668439
RNF44	-0.755463	0.000669054
VASN	-1.85146	0.000674169
GNG12	0.965127	0.000674169
GPR88	-1.26429	0.000674364
HOMER1	1.72792	0.000681283
TNKS1BP1	0.668023	0.000682581
GPATCH8	0.783788	0.000685197
UBE3C	0.849134	0.000688583
CACNG5	1.93597	0.000688583
HSPB1	-0.460034	0.000688583
MTHFD1L	1.10358	0.000688583
SLC6A8	0.307588	0.000688583
TBC1D5	-1.52184	0.000688583
VAV3	2.28756	0.000688583
SPOCD1	3.38609	0.000688583
ADAM19	0.849601	0.000688583
KIF5C	0.600962	0.000688583
TUBB4B	0.499899	0.000688583
ZNF398	1.20529	0.000688583
MAT2A	0.454234	0.00068942
TNFRSF10B	0.856273	0.000693591
NGFR	1.46957	0.000696627
GNG7	0.991965	0.000699504
DLST	0.814624	0.000702156
TRIM22	0.397482	0.000702156
SEMA7A	1.50862	0.000702156
DBP	-1.8081	0.000703933
RGS3	-0.979623	0.000706944
SLC35E4	1.47589	0.000709615
KRT80	3.2783	0.000709615
RPL37A	-0.285905	0.000709615
ABCC1	-0.598325	0.000712512
FRAT1	-1.82117	0.000712523
UAP1L1	-1.06833	0.000712523
METRN	-0.589156	0.000715792
ADAMTS3	1.84749	0.000715792
UHRF1	0.503685	0.000722241
LIMS1	1.1085	0.000722241
DDX60L	0.409058	0.000725412
BAIAP2-AS1	1.49633	0.000727114
LOXL4	2.16828	0.000730724
RGS16	-0.847589	0.000730724
ZFP36L2	0.56444	0.000730724
DNAJB1	0.925206	0.000731276
RP3-428L16.2	0.898716	0.000731276
PLCH1	-1.97547	0.000736613
SH3RF3	1.32041	0.000738503
TNS1	1.38905	0.000739345
GPD2	1.17477	0.000739345
HELZ2	0.260186	0.000739367
PPRC1	0.63981	0.000739367
RP1-74M1.3	1.90602	0.000739367
LPP	1.72006	0.000742012
CDC42SE2	-1.25503	0.000742012
AC005789.11	2.85251	0.000742012
TET3	0.58207	0.000744717
ANP32A	-0.731987	0.000745159
WNT7A	-1.89963	0.000745653
ALPK2	1.26153	0.000745653
BRD8	-1.03089	0.000746019
GDF1	-0.652493	0.000746019
ZMYM3	-0.526394	0.000746019
PTCHD1	0.951367	0.000746019
SGK223	1.15259	0.000746019
MKLN1	2.04805	0.000749281
ETV1	-0.491894	0.000749463
KIF1B	0.579076	0.000749463
FKBP5	0.787777	0.000749463
PNPT1	0.489383	0.000749463
TRPM8	1.99495	0.000749463
NSUN2	0.654362	0.000751582
OSBPL3	1.06036	0.00075224
ATCAY	-0.944891	0.000753537
GPSM2	-0.871405	0.000755062
USP2	-2.37558	0.000758693
MYCBP2	0.696864	0.000758835
IFNGR2	0.916026	0.000758835
PGM2L1	1.36564	0.000758835
RBM10	-0.529439	0.000758835
C11orf95	-0.69866	0.000758835
MKL2	1.52328	0.000760701
SPEN	0.572843	0.00076279
EVC	1.06973	0.00076279
TLR4	1.66953	0.00076279
SHISA5	0.482978	0.00076279
CSNK1G1	1.30152	0.00076279
USP18	0.407346	0.000766569
FRMD8	1.74674	0.000771693
CD63	1.20105	0.000771693
CCDC80	-0.780469	0.000775875
MT-ND4	0.140408	0.000780085
ACTR3	0.992813	0.00078189
BACE1	0.630529	0.000783484
DCX	-0.337617	0.000784031
MT-ND1	0.290276	0.000791591
TAOK1	0.578624	0.00079408
NEDD4	1.41233	0.000794965
PCSK1N	-0.663712	0.000794965
MAPK8IP1	-0.72036	0.000794965
CA14	-1.10431	0.000795447
POU3F2	0.430674	0.000795447
FNDC3B	1.02853	0.000800896
ATP10A	0.878103	0.000800896
SBNO2	0.565491	0.000801397
RBM3	1.23419	0.000809373
SH3TC1	2.49893	0.000809373
ARL4C	0.356879	0.000811303
LEPREL1	1.79865	0.000814872
STK11	-0.589124	0.000814872
DDB2	1.4477	0.000814872
DDX46	0.63838	0.000814872
FAM46A	0.956393	0.000815851
PDGFB	3.35178	0.000816214
BDP1	1.05382	0.000816214
SH3RF1	1.02759	0.000816214
ENGASE	-0.785243	0.000816214
CMKLR1	2.43988	0.000816214
KCTD12	-0.565713	0.000816214
SMG5	0.393938	0.000816214
CCDC86	0.596606	0.000817746
TNIK	1.26544	0.000817746
CXCL10	0.536334	0.000817746
CTC-503J8.6	-0.651424	0.000818633
AP1S1	0.946541	0.00082202
UNC13A	0.92269	0.00082202
CHSY1	0.770353	0.000822497
ZC3HAV1L	1.46092	0.000822497
C20orf112	-0.866582	0.000822497
REPIN1	-0.543333	0.000822497
CD44	3.04867	0.000823928
PHGDH	-0.368937	0.000823928
HS3ST3B1	1.47548	0.000824015
BRD3	-0.822288	0.000824015
SH3BGRL3	0.755388	0.000825607
FAM84B	0.88783	0.000827015
FRAT2	-1.37548	0.000828644
SERTAD1	1.36732	0.000828644
CCDC177	-1.8463	0.000828644
EIF2AK2	0.365398	0.000829181
THSD1	1.64046	0.000830411
ULK1	-0.80971	0.000836629
NCOA7	1.36089	0.000838345
PEX6	-0.789945	0.000838345
EMP1	6.18383	0.000838383
ELFN1	3.80276	0.000841302
MACF1	0.441599	0.000844862
C21orf58	-1.04265	0.000845522
TPX2	-0.735213	0.000846303
JPH1	1.8425	0.000847554
RDH10	1.3855	0.000847554
BSN	0.858763	0.00084857
FAM83G	2.14209	0.00084857
CX3CL1	1.75784	0.00084929
EEA1	1.11382	0.00084929
MMP15	-0.914818	0.00084929
LDHA	0.66953	0.00084929
MAML2	0.871122	0.00085235
ARHGEF10L	-1.02355	0.00085862
PITPNM3	4.61265	0.00085862
USP9X	0.403444	0.00085862
LDLR	1.20312	0.00085862
TPM3	0.599042	0.00085862
MX1	0.171639	0.00085862
KLF13	-0.833424	0.00085862
HARS	0.683213	0.00085862
GPR56	-0.404057	0.00085862
PIEZO1	0.690976	0.000862574
GARS	0.583593	0.000862574
EIF3A	0.405133	0.000862574
FASN	0.15227	0.000862574
BACH1	0.733236	0.00086428
C2CD4A	1.55771	0.000867159
ARHGEF40	0.502348	0.000873369
MAZ	-0.460512	0.000876483
ARHGEF2	-0.50555	0.000876483
GLIPR1	2.22869	0.000876483
NFIA	-0.837677	0.000876483
PATZ1	-0.580867	0.000877421
GLCE	1.58279	0.000877611
PLK3	1.41401	0.000877611
KCND3	3.07691	0.000888083
GNB4	0.712926	0.000892788
OTUD7B	0.629937	0.000892788
INPP5D	2.73473	0.000892788
YWHAG	0.279493	0.000892788
BAX	0.562987	0.000896934
PURB	0.606026	0.000901956
RPL36A	-0.345171	0.000901956
SNED1	2.33154	0.00090217
SOX11	-0.379198	0.00090217
TBC1D14	-0.656393	0.000907648
SHC3	1.19554	0.000907648
SPATA2L	1.12873	0.000907856
RPS4X	-0.263423	0.000907856
USP20	-0.870501	0.000909383
ANGEL1	-1.00106	0.000909882
CABP7	-2.14628	0.000916573
LIMA1	0.78283	0.000917249
N4BP1	0.874572	0.000917249
MYO1E	1.10182	0.000917251
DAZAP2	-1.27396	0.000917251
MAFF	1.64396	0.000917251
AC009501.4	-1.12775	0.000917832
SHB	0.810937	0.000918098
DMTN	0.868074	0.000919601
GPRIN1	0.530039	0.000920034
CHMP1B	-0.890366	0.000920034
NPAS2	0.998821	0.000920812
OPHN1	-1.31643	0.000922389
TTLL12	-0.474848	0.000922389
PUM1	-0.671384	0.000922389
OCIAD2	1.01447	0.000922389
CASP2	0.662742	0.000927138
BAI2	0.470878	0.000927138
CRABP2	1.737	0.000927138
ORAOV1	-1.56527	0.000927138
PTMS	-0.420042	0.000927138
BRI3	-0.682981	0.000927138
RPS6KA2	0.636436	0.000929607
NPR2	1.07927	0.000929712
DHRS13	-1.1457	0.000929712
EPHB4	-0.367067	0.000929712
ING4	-1.43123	0.000930335
CHL1	0.717916	0.000931695
FAM213A	-0.551021	0.000932221
S100A4	0.54056	0.000932243
KPNB1	0.461651	0.000937827
PAIP2	-0.880996	0.000938484
MAN1A2	0.66675	0.000943843
CTSD	-0.452767	0.000948001
SEMA6B	-0.641495	0.000948001
KAT6B	-0.931131	0.000957321
MT-CYB	0.241181	0.000957815
GNL2	0.605646	0.000958787
ARHGAP35	-0.418349	0.00096424
DYNC1H1	0.290302	0.000964246
GSTP1	-0.439125	0.000964534
MCM3AP	0.538281	0.000964534
TACC3	-0.746267	0.000964943
GNAO1	-0.863416	0.000965254
MAP3K1	0.606928	0.000965313
FEZ1	-0.7805	0.000965313
GPR180	1.1223	0.000965313
FBLIM1	1.06176	0.000965313
S100A13	1.43626	0.000965313
ZFP91	0.608398	0.000966727
MAP3K9	1.54479	0.000974178
RPL10	-0.218141	0.000978411
PKN1	-0.43739	0.000982143
RAPGEF3	2.20574	0.000982279
PHLPP1	-0.543918	0.000982883
TSPAN11	0.623539	0.000982883
ETF1	0.739053	0.000982883
CAPN5	0.647612	0.000982883
PRDX4	-0.578135	0.000983301
PIF1	-1.31067	0.000983923
ATP1A1	-0.180991	0.000983923
SMG1	0.642391	0.000984683
PLXNA1	0.411084	0.000985727
NRP2	1.15297	0.000985727
C15orf38-AP3S2	-3.26494	0.000985727
KCNJ5	6.11704	0.000989028
CHD1	0.780496	0.000989028
KCNJ10	-1.07842	0.000989028
SRXN1	0.752506	0.000989028
PDZD4	0.593913	0.000989929
CBFA2T2	-1.35508	0.000991311
SNHG7	-0.760039	0.000991721
KIRREL	0.450071	0.000992774
TRIM24	0.518603	0.000994351
SYTL5	2.52052	0.000994764
CCT2	0.458916	0.000996049
ARF3	0.486381	0.000996969
MUM1	-0.828185	0.000996969
WDR43	0.814005	0.000996969
DRAM1	1.2155	0.000998242
SRRT	0.425609	0.00100214
MSMO1	0.770278	0.00100302
NR4A3	2.7848	0.00100302
AC010335.1	-5.17697	0.00100302
CAMK2B	1.71464	0.0010056
GNB1	0.275714	0.0010056
HMGCS1	0.585162	0.0010056
OSMR	1.41188	0.0010056
IRS1	0.988028	0.0010056
HAS2	1.21255	0.0010056
PCMTD2	-0.690132	0.0010056
GOLIM4	0.46315	0.00100571
MUTYH	-0.991764	0.00100936
RNF5P1	-0.648442	0.00101328
EIF3B	0.388335	0.00101523
MYBBP1A	0.564253	0.00101677
ARL10	0.583794	0.00101687
ANKRD12	-1.09545	0.00101897
ARID5B	0.803096	0.00102125
HERC2P3	-0.863588	0.00102125
H2AFX	-0.55831	0.00102411
INPP1	1.83295	0.0010246
IMPAD1	0.533564	0.00102475
SRRM2	0.491909	0.00102475
IFIT1	0.213264	0.00102864
PHC2	0.486704	0.00103178
PBX3	-1.59568	0.00103285
EFNB2	0.541259	0.0010382
ACTR2	0.531855	0.0010382
ASCL1	-1.00566	0.0010382
CNPY3	-0.632895	0.00104113
NUDT11	-0.699787	0.00104113
ABCD1	0.807137	0.00104208
GEMIN8	-1.33516	0.00104354
PTP4A3	1.06706	0.00104477
ARHGEF4	2.41716	0.00104551
RANBP2	0.601322	0.00105875
LRRC45	-0.742393	0.00105875
PPM1E	1.12176	0.00105875
DENND1A	-0.65661	0.0010617
STON1	-1.6052	0.00106188
JAKMIP2	-1.46001	0.00106275
VIM	0.488351	0.00106407
RPL10A	-0.372649	0.00106435
TFE3	0.488938	0.00106843
RNMT	1.51534	0.00107082
SOBP	-0.514613	0.00107082
KCNJ2	0.735524	0.00107344
SNHG5	-0.949757	0.00107344
ZNFX1	0.755872	0.00107485
ZNF219	-0.658547	0.00107862
DDX5	0.772324	0.00108304
EIF2S1	0.651831	0.00108304
FBN2	0.98506	0.00108304
MED1	0.652991	0.00108765
FOSB	3.25621	0.00108765
DMRTA2	-0.553784	0.00108765
UBAP2L	0.356309	0.00108765
PI4K2A	0.557046	0.00108765
TMEFF1	-0.995036	0.00108765
BAZ2B	-0.967166	0.00108818
YME1L1	0.463238	0.00109113
SMURF1	0.612199	0.00109113
CBL	0.818309	0.00109241
ABHD2	0.392423	0.00109241
TMSB4X	-0.310691	0.00109241
SHC4	1.81511	0.00109309
TMEM131	0.57601	0.00109739
BCL7A	-0.821948	0.00109739
NUP153	0.660734	0.00109739
KLHL25	0.564493	0.00109739
GRAMD1A	-0.637604	0.00110004
HRK	-2.01674	0.00110004
MYO5A	0.923589	0.00110004
SIK3	0.681415	0.00110313
H3F3AP4	-0.584921	0.00110504
ACTG1	1.42638	0.00110815
GPR139	1.80631	0.00110881
IL11	4.05707	0.00110934
AC074212.5	-1.7061	0.00111002
SH3BP1	1.1681	0.00111008
EPT1	0.574628	0.00111018
DST	0.71222	0.00111338
ZNF775	-1.10948	0.00111414
NBAS	0.233243	0.00111581
RPS14	-0.313636	0.00112382
MIR4435-1HG	2.17862	0.0011302
CDK19	-0.957667	0.00113285
UTP20	0.729973	0.00113429
JUND	-0.60339	0.00113429
BCL6	-0.591975	0.001135
SPHK2	-1.07569	0.00113613
ZNF217	0.48154	0.00114099
ATN1	-0.32844	0.00114485
CNTFR	-0.861725	0.00114552
CCNB2	-0.871958	0.0011524
GBP2	0.959143	0.0011524
CD274	2.15528	0.00115829
UPF3B	-0.674545	0.00115829
MAGI1	0.547127	0.00115829
LTBP3	-0.557907	0.00115829
KDM4A	-0.471411	0.0011609
RGS17	2.24569	0.0011609
XXbac-B461K10.4	2.48584	0.0011609
SFPQ	0.274681	0.0011609
B4GALNT3	1.64414	0.0011609
HERC2P2	-0.971116	0.0011609
RRP1	0.510803	0.0011609
RPP25L	-0.921039	0.0011609
BAIAP2	1.35855	0.0011609
ZBED6	1.2637	0.0011609
RP11-284F21.10	1.86345	0.0011609
DIRAS2	1.02474	0.001161
MAPRE2	1.08729	0.001161
TIAM2	1.47162	0.00116227
IRX1	-0.878736	0.00116272
CLIP1	0.841012	0.0011688
IGFBP5	-0.677409	0.00116883
CDKN1B	-0.769451	0.00116889
KAT6A	0.448224	0.0011732
BTRC	0.695499	0.001175
PIK3R2	-0.394382	0.00117649
STARD8	1.75791	0.00117649
BMPER	-3.32754	0.00117649
CTA-445C9.15	2.92962	0.00117649
CCDC71L	0.672932	0.00117823
SLC7A11	0.99189	0.00117989
MICAL1	-0.546786	0.00118208
PDIA4	-0.257322	0.00118291
IFI16	0.345156	0.00118291
HSPA4L	0.806911	0.00118413
JUP	-0.93901	0.00118413
ZNF428	-0.454052	0.00119134
AC096677.1	2.17182	0.00119134
PLAGL2	0.704763	0.00119845
UNG	-0.68372	0.0011996
RP11-1055B8.7	-0.615032	0.0011996
SNN	-0.577111	0.00119969
RELT	0.807257	0.00120025
PREX1	1.03633	0.00120965
LIX1L	-0.898284	0.00120965
LRRN2	-1.00895	0.00120971
DAGLA	0.828486	0.00121079
DGCR5	1.69466	0.00121079
DPYSL2	-0.531741	0.00121348
RAB11B	-0.41409	0.00121606
KCNQ2	-0.411638	0.00121607
PPM1H	-1.1739	0.00121607
UBL3	0.649295	0.00121607
PMM2	1.0371	0.00121732
HOMER2	1.40261	0.00122785
SLK	0.747122	0.00123189
SMC1A	0.386291	0.00124166
CREB3L4	-1.18915	0.00124166
BTBD19	3.28975	0.00124224
EZH1	-0.919253	0.00124695
EIF4EBP1	-0.464263	0.00124695
TLE2	-0.887636	0.00124788
TCOF1	0.39511	0.00124788
CLIC4	0.432269	0.00124788
EWSR1	0.373434	0.00124846
SOCS2	2.8265	0.00124853
FEM1A	0.508977	0.00124949
ATAD3B	0.744705	0.0012524
SLC41A2	1.24021	0.00126176
ZNF827	1.13727	0.00126271
RPLP2	-0.307401	0.00126271
KCNK10	1.2162	0.00126408
SCAP	-0.415699	0.00126905
VANGL2	-0.412568	0.00127364
KCTD9	1.08084	0.00127462
AKNAD1	-1.62551	0.00127462
SEMA6C	-1.20559	0.00127612
RAB33A	-1.21805	0.0012767
BACH2	1.34025	0.00128686
PCDH17	0.785893	0.00128686
CHST3	0.46502	0.00128686
MYO7A	2.45373	0.00128686
RAPH1	1.73407	0.00128686
TNRC18	-0.531654	0.00128686
EBF3	-1.31606	0.00128739
RPS12	-0.294124	0.00128739
TOMM40	0.603954	0.00128739
PODXL2	-0.398955	0.00128978
MSI1	-0.756797	0.00129003
SNX18	0.764832	0.00129495
H3F3A	-0.386953	0.00129523
HDGF	-0.260599	0.00129555
ZDHHC5	0.612256	0.00129674
PDLIM7	0.95477	0.00129674
FARP2	0.805451	0.00130078
OSBPL6	0.71704	0.00130078
SDCCAG8	-1.02769	0.00130211
KLHDC3	-0.443892	0.00130211
MEGF10	-1.31677	0.00130211
KLHL42	0.889713	0.00130388
CACNG4	-0.488746	0.00131047
EEF1A2	-0.273812	0.00131047
MAF1	-0.644596	0.00131047
UBR3	0.901945	0.00131195
KCNA2	1.53657	0.00131581
NDC80	-1.0267	0.0013169
PLP2	0.49945	0.00132391
NEDD9	1.48211	0.00132395
GRIA3	1.18078	0.00132514
RAN	0.756784	0.00132514
CLCN5	1.58226	0.00132514
METTL7A	-1.74956	0.00132575
ITPRIPL2	0.927549	0.00132575
TANC2	0.832243	0.00132669
CALCOCO1	-1.03574	0.00133268
POU2F1	-1.85234	0.00133315
TSC22D4	-0.532276	0.00133315
LRRN1	-2.46187	0.00133315
BAZ1B	0.270654	0.00133427
LPIN2	-0.776987	0.00133427
SP140L	1.17903	0.00133427
ZNF358	-0.515249	0.00133427
YPEL5	-0.845672	0.00134642
PCDH9	0.858954	0.00134677
FBXL20	-1.32256	0.00134852
C17orf103	-1.71464	0.00135096
DLC1	4.35026	0.00135115
AC040173.1	-7.30356	0.00135421
SYNM	0.931108	0.00135693
NUPL1	0.668618	0.00135819
KIAA0020	0.711035	0.00136632
L1CAM	0.557842	0.00136632
MAPRE1	0.388596	0.00136695
CHPF2	0.986127	0.00137366
TRIP12	0.605191	0.00137469
SASH1	-0.569234	0.00137813
KIAA0368	0.481731	0.00137813
KCNIP1	2.18982	0.00137813
RP11-196G18.22	-1.606	0.00137813
SLC4A3	0.757305	0.00137866
SLC30A1	1.06143	0.00138079
LRRC10B	2.0512	0.00138079
CASC7	0.479509	0.00138079
E2F2	-0.954754	0.00139267
USF2	-0.462338	0.00139287
ZNF395	-0.676677	0.00139287
PLCD3	1.33653	0.00139559
LOXL2	1.29317	0.00140282
P4HA2	1.59835	0.00140424
CDH24	-0.457758	0.00140578
NRG2	-0.937452	0.0014066
NUP155	0.461894	0.00140692
GAS5	-0.689528	0.00140692
RSG1	-1.70855	0.00140829
RP11-2E17.1	2.94198	0.00140829
MXI1	-1.4361	0.0014152
ARHGAP32	1.07941	0.00141751
RP11-690G19.3	-2.2348	0.00141956
SEZ6	1.69886	0.0014321
TTC9	1.1787	0.00143393
KIF2C	-0.749868	0.00143393
MUT	-0.83178	0.00143393
ARL5B	0.770808	0.00143393
ERP29	-0.503383	0.00143397
SH3KBP1	0.617419	0.00143397
ZSWIM6	0.734261	0.00143542
NAA25	0.805084	0.00143847
LAMP5	-0.797168	0.00143873
RGR	-1.15048	0.00143873
DHX15	0.452812	0.00143969
ARMCX1	-0.644408	0.00143969
ST6GAL1	-1.26364	0.00144301
ASCC3	1.29783	0.00144312
RP11-1055B8.4	-2.04561	0.00144312
IGF1R	0.504431	0.00144359
SCHIP1	-1.07873	0.00144359
PPP1R15B	0.530649	0.00144359
C14orf93	-1.27279	0.001445
SLC2A3	1.52143	0.00144641
GRWD1	0.480106	0.00144641
B4GALNT4	-0.322578	0.00145106
PER2	1.07625	0.0014516
TOB2	0.576778	0.0014516
TP53	-0.77895	0.00145176
IFNL1	2.04712	0.00145662
PCNX	0.94697	0.00145666
CPEB2	1.17647	0.00146044
CROCC	-0.842656	0.00146113
XRCC5	0.300399	0.00146161
FASTK	-0.562629	0.00146742
KIF22	-0.519468	0.00147255
XPO5	0.41404	0.00147255
ENDOD1	0.903824	0.00147255
CIRH1A	0.671321	0.00150296
GPR173	-0.82323	0.00150296
DHX37	0.467227	0.00150616
AMIGO1	-0.996772	0.00150993
MAPK8IP3	0.558226	0.00151339
SNX33	-0.790015	0.00151822
RP13-608F4.5	3.88337	0.00151822
NOP2	0.629433	0.00152046
FAM181B	-0.391062	0.00152046
NCS1	0.362431	0.00152231
SOCS4	0.895583	0.00152689
ANKRD11	0.304796	0.00153083
GPI	0.274035	0.00153173
HSPA4	0.469245	0.00153373
TMEM108	-1.17596	0.00153584
IFNL2	4.17742	0.00153584
ZNF740	-0.673288	0.0015361
RPSA	-0.274747	0.00153817
DGKZ	0.847128	0.00154057
DLK2	1.09784	0.00154057
CNOT1	0.325891	0.0015436
DVL1	-0.36713	0.00154578
C12orf68	1.65412	0.00154713
RPL18	-0.288705	0.00155615
WHSC1	-0.99122	0.00155615
HIPK3	1.11674	0.00156075
CAPRIN2	1.76377	0.00156079
MOB1A	0.433104	0.00156079
ABCA12	3.3923	0.00156079
SRSF12	1.18006	0.00156079
TCERG1	0.666528	0.00156518
ZBP1	0.929194	0.00156518
ADRM1	0.444956	0.00156518
TMX3	0.707251	0.00156518
MDGA1	1.23271	0.00156619
KBTBD7	-1.22337	0.00156619
MYO9B	0.348594	0.00156723
PCNXL2	1.08	0.00156772
PSMD12	0.96709	0.00156772
OSBP2	1.5489	0.00157104
MFSD2A	1.12771	0.00157328
THAP8	-1.13741	0.00157345
MAT2B	-0.817315	0.00157392
USP24	0.475873	0.00157653
H1FX-AS1	-1.92177	0.00158016
PODXL	0.511594	0.00158147
DUSP10	-2.28022	0.00158515
KIAA1614	-1.00479	0.00158678
SF3B4	0.46729	0.00158678
RPL41	-0.248261	0.00158678
LGR4	-0.768051	0.00159024
LRP1	0.460993	0.00159064
VPS37D	-1.31852	0.00159096
AFF4	0.750462	0.00159461
ATP8A1	-0.768719	0.00159461
PDCD11	0.406039	0.00159461
F2RL1	2.34371	0.00159461
MLLT3	-1.21791	0.00159461
IDI1	0.688069	0.00159602
CYP1B1	1.65578	0.00159602
RP11-1008C21.2	2.82759	0.00160124
2019-09-09	0.476074	0.00160323
VMP1	0.608681	0.00160661
CSNK1A1	0.616165	0.00160661
DIS3	0.598238	0.00160801
AHR	1.40671	0.00161307
NAA15	0.928628	0.00161307
RPS28	-0.366619	0.00161495
LYAR	0.762119	0.00161717
VIPAS39	-1.01979	0.00162145
SP110	0.49855	0.00162462
TSPAN9	0.847594	0.00162682
XPO1	-0.472237	0.00162682
PUS7	0.556644	0.00162682
GNAI2	-0.269578	0.00162682
TMTC4	-0.748549	0.00162682
MIS18BP1	-0.871477	0.00162682
PDK1	1.60961	0.00162682
APCDD1	-1.65305	0.00162682
KLF10	0.566604	0.00162682
ZER1	-0.674617	0.00162682
SPSB3	-1.27349	0.00162682
AMOTL1	0.516786	0.00162682
USP54	-0.766611	0.00162682
RRAD	1.45486	0.00162682
RBPJ	-0.52982	0.00162682
PCMTD1	-1.21768	0.00162682
CTD-2047H16.4	1.53562	0.00162682
RPL19	-0.256911	0.00162687
CYHR1	-0.656143	0.00162687
CAMSAP2	0.535517	0.00162694
RYR3	1.22889	0.0016294
GAPVD1	0.737372	0.00163004
ALMS1	0.723981	0.00163291
AC034102.1	-0.599323	0.00163298
ESYT2	0.519566	0.00163712
EGR2	0.997383	0.00163894
YES1	0.438346	0.00163894
SEZ6L	1.56257	0.00164235
SEC23IP	0.681289	0.00164235
CHST8	2.14191	0.00164491
ODC1	-0.424216	0.00165562
TBC1D17	-0.834259	0.00165792
MDFI	-1.36062	0.00165892
CAMSAP1	0.359333	0.00165892
RNF126	0.595327	0.00167051
CXADR	0.663742	0.00167051
SIX2	-2.80461	0.00167051
TRIL	-0.805708	0.00167051
NCL	0.251432	0.00167253
HSPA14	0.731372	0.00167438
OAS3	0.167349	0.00167518
PIM2	0.828363	0.0016765
RDX	0.438343	0.00167699
NCKAP1	0.402789	0.00167769
AIM1	1.89163	0.00167769
INCENP	-0.630925	0.00167769
MYRF	0.943257	0.00167872
HS1BP3	-1.16101	0.0016872
PTAR1	0.544721	0.0016872
HIRIP3	-0.976022	0.00168951
SERINC1	-0.43462	0.00169052
CPA4	2.63113	0.00169335
CCDC144B	1.29704	0.00169335
SLC38A2	-0.343142	0.00169349
RPL31	-0.400612	0.00169406
MEIS1	-1.02981	0.00169406
PPME1	0.881481	0.00169406
WDR34	-0.368295	0.00169583
IFIT5	0.315332	0.00169583
CHD9	0.974762	0.00169939
TBX2	0.682626	0.00170355
KIF1C	0.426666	0.00170355
HSD17B12	0.837401	0.00170355
TPRN	-0.75991	0.00170355
ARHGEF9	-0.861144	0.00171574
BBS2	-0.87835	0.00171763
MIDN	-0.401411	0.00171763
PKD1P1	0.413332	0.00172383
FRMD4A	0.559217	0.00172757
KIAA0430	-0.546946	0.00172757
NID1	0.539149	0.00173039
TIMP1	0.917099	0.00173118
RECQL5	-0.806245	0.00173118
CLTC	0.669702	0.00173118
ZRANB3	-1.28176	0.00173267
PPP1R9A	-0.838704	0.00174829
FHL2	1.50937	0.00174937
ZNF275	0.645057	0.00175845
TMEM230	-0.737312	0.00176474
TNFRSF21	0.459077	0.0017691
BMS1	0.566976	0.00177081
TANC1	0.752469	0.00177286
FAM134C	-0.760209	0.00177978
ETV3	0.622289	0.00178432
SIK1	-0.485566	0.00178501
ARSJ	0.821996	0.00178501
GBE1	0.916384	0.0017864
GAREM	1.08199	0.0017864
HUNK	-0.717193	0.0017864
ARHGEF19	-0.924432	0.0017864
FLCN	-0.758656	0.0017864
EPHB1	-0.56404	0.0017864
NUAK2	0.499043	0.0017864
PLEKHA7	-0.928986	0.0017864
PTPN1	0.640364	0.0017864
RAB23	1.14951	0.00179388
GAD1	1.07538	0.00179458
KIAA0247	-0.719424	0.0018019
LARP4B	0.520761	0.0018019
ERN1	1.02465	0.0018019
MTF1	0.770827	0.00180372
CDC42EP4	-1.00955	0.00181235
SEMA4B	-0.904337	0.0018143
RPL23A	-0.262818	0.00181466
NCAPD2	-0.702252	0.00182259
ATG9A	-0.464307	0.00182259
DDX1	0.104972	0.00182272
MSH2	0.551951	0.00182272
SLC9A3R1	-0.453041	0.00182569
SHC2	-0.772293	0.00182569
KIAA0513	2.57907	0.00182569
TACC2	0.873018	0.00182726
TONSL	-0.527357	0.00182799
TNR	1.01557	0.00183035
TSHZ1	-0.715456	0.00183035
COBLL1	1.6242	0.00183569
MYOG	-1.77959	0.00183586
ESPL1	-0.574457	0.00183586
C11orf96	-0.567061	0.00183615
KITLG	4.84376	0.00184041
KLC4	-0.889468	0.00184041
CBFB	0.797883	0.00184501
SCARA3	0.643017	0.00184501
TMSB10	0.195608	0.00184742
MTX3	0.902463	0.00184742
HNRNPA3	0.212312	0.00184901
SPAG1	1.81614	0.00184953
NOTCH3	-0.275262	0.00185272
MAMLD1	2.05296	0.00185315
PXDC1	0.655949	0.00185315
RP11-271K21.11	-0.886023	0.00185315
IFNAR1	-0.966463	0.00185727
LRRC4B	-0.33907	0.00186554
TUB	-0.934378	0.00186554
PLEC	0.34267	0.00186947
SPATS2L	0.460617	0.00186947
BATF3	2.30719	0.00187156
IL1RAP	2.89458	0.00187156
SRGAP3	-0.890228	0.00187156
WRB	-0.78258	0.00187394
ZNF37A	0.634534	0.00187689
S100A3	3.20459	0.00187689
PAN2	-0.667898	0.0018782
FAM20C	0.44176	0.00188462
HNRNPD	0.236653	0.00189049
MCM2	-0.326058	0.00189166
SAT1	0.520283	0.00189587
ARHGEF12	0.586516	0.00189643
C18orf25	0.822718	0.00189894
SV2A	0.407387	0.00190401
MARS	0.360947	0.00190401
EGFR-AS1	1.64431	0.00190794
ZEB2	-0.43702	0.0019095
ZCCHC12	1.36109	0.00191333
FUBP3	0.41694	0.00191445
HRH3	-2.95906	0.00191884
CCRN4L	1.52461	0.00192159
PNN	0.393457	0.00193013
NEURL	2.24958	0.00193013
HMGA1	0.526526	0.00193013
ATOH8	-4.42411	0.00193247
ILF3-AS1	-1.01172	0.00193281
KLF11	-0.90207	0.00194441
PAX6	-1.1676	0.00194481
DLG1	0.587158	0.00194481
PCYT1B	-0.673688	0.00194481
HERC5	-0.463154	0.00194481
MYO15A	0.421201	0.00194564
TNRC6A	0.38186	0.00194566
PRKCD	1.42506	0.00194659
ACSL4	0.549887	0.00194903
FAM3C	0.447507	0.00195011
LRRC20	-0.697645	0.00195342
TMEM187	-2.06681	0.00195342
RHPN1	-0.420403	0.00195942
NUP98	0.421782	0.00196186
UBE3A	0.431319	0.00196216
LYNX1	1.29049	0.00196216
MTMR4	-0.670861	0.00196798
NRF1	1.10003	0.00196831
SMO	-0.371012	0.00196831
PELI2	-0.696019	0.00196831
ZNF800	0.910537	0.00196842
RHOB	0.582335	0.00196842
CACNG7	-0.418287	0.00196914
TTL	0.447154	0.00197502
DDN	0.690615	0.00198517
HMGB3	-0.324637	0.00198967
TTK	-0.976245	0.00198967
LIPG	0.557002	0.00199874
LGALS3	0.991265	0.00199874
SOGA1	0.28043	0.00199874
FOXJ1	-1.51525	0.00200088
ZC3H4	-0.351126	0.00200088
USP21	-0.753611	0.00200088
POLE	0.388329	0.00200088
PDE3A	2.20358	0.0020034
SMC3	-0.357502	0.00200931
SLC25A44	0.601447	0.00200966
RPS2P5	-0.373176	0.00201129
RP11-500C11.3	0.948025	0.00201129
MAP2K5	-1.26612	0.00201258
SREBF1	-0.643686	0.00201779
CBX7	-2.97949	0.00201779
TAOK2	0.411826	0.00201779
VSTM4	-1.23794	0.00202045
UBA1	-0.142685	0.00202596
CAMLG	-0.678212	0.00202596
SEC22A	-1.13812	0.00202617
GFPT2	1.05058	0.00202617
CDT1	-0.599027	0.00202617
ELMO1	-0.70466	0.00203234
PCM1	0.359969	0.00204904
ANXA5	0.602864	0.00204904
ABCE1	0.419251	0.00204904
PTPN11	0.354256	0.00205908
AEBP1	0.441784	0.00205909
USP34	0.488807	0.00205909
KLHL12	-0.60721	0.00205909
ICOSLG	0.993744	0.00205909
FILIP1L	2.44916	0.00205976
IFNB1	1.7471	0.00206039
DIDO1	0.39703	0.00206054
CIITA	1.36446	0.00206296
EP400	0.503739	0.00206311
ZNRF3	0.665881	0.00207109
GPCPD1	-1.27132	0.00208205
MED13	0.606949	0.00208363
LINC00941	4.86503	0.00208744
LATS2	1.00814	0.00209433
FKBP3	-0.70846	0.00209525
LRRC59	0.762098	0.00209525
ARFGEF2	0.616905	0.00209525
VPS13C	0.473253	0.00209525
CIAO1	0.443174	0.00209525
ADAMTS16	4.20842	0.00209525
IGFBP1	5.13797	0.00209525
FUBP1	0.370135	0.00209525
CLCF1	3.53661	0.00209525
RPS27	-0.269408	0.00209525
PITPNB	0.540765	0.00209525
HIST3H2A	-1.71061	0.00209525
MEX3D	-0.625	0.00209525
HIST2H4B	-2.01729	0.00209525
BRI3BP	0.602497	0.00209525
MYO1C	0.666298	0.00209525
GTF2H4	10.3229	0.00209525
TATDN2P2	1.9133	0.00209525
RP11-742N3.1	-0.477923	0.00209525
SNX27	0.485126	0.00210802
ASXL2	0.649491	0.00210802
RCAN1	0.706563	0.00210802
FHL3	0.783953	0.00210802
RP1-27O5.3	-10.2869	0.00210802
MANBA	-1.16798	0.00211483
RP11-15H20.5	-1.16466	0.00211483
MICALL1	0.5197	0.00212503
DYNC1LI2	0.375488	0.00213044
ELF3	-1.30174	0.00213044
CDCA7L	-0.725326	0.00213044
AGRN	-0.157143	0.00213044
SLC2A4	-1.94004	0.00213112
LRRC27	-1.07076	0.00213369
NR1D2	-1.185	0.00213697
MT2A	-0.399936	0.00214073
PATL1	0.560221	0.00214697
HIVEP3	3.0997	0.00215021
TIAM1	0.524515	0.00215021
RBM15	0.634343	0.00215021
RAD21	-0.466489	0.00215021
TNFRSF6B	-6.64345	0.00215021
FAM117A	-1.14327	0.0021594
SMARCC2	-0.410607	0.00216508
UHRF1BP1	0.682886	0.0021658
RPAP3	0.947161	0.00216622
NGEF	2.5046	0.00216622
MED25	-0.392978	0.00216622
FGF2	0.901951	0.00216622
BUB1B	-0.682394	0.00216622
C17orf76-AS1	-0.412162	0.00216622
RP3-326L13.3	-1.22393	0.00216622
FTH1	-0.258153	0.00216788
FAM69A	-1.16606	0.00217319
SMAD3	0.494825	0.00217319
MXD3	-1.28881	0.00218299
GSN	0.696428	0.0021838
CTD-3193O13.9	-0.472632	0.00218697
CABLES1	-1.18527	0.00218792
WDTC1	-0.441095	0.00218792
CTAGE5	-1.11543	0.00218792
ELAVL4	-1.26662	0.00218792
WDFY3	0.630077	0.00218792
REEP3	0.7318	0.00218792
RBM4	-0.511921	0.00218792
ATG13	-0.589771	0.00218792
FIBIN	-1.43602	0.00218792
SRSF6	-0.321936	0.00219062
AKAP5	2.7626	0.00219062
HS3ST3A1	2.35608	0.00219089
MEX3B	-0.539767	0.00219089
PIGV	-1.87646	0.00219218
STK4	0.993555	0.00219579
TXNIP	-0.281505	0.00219579
CCDC109B	0.61751	0.00219634
GRAMD4	-0.533868	0.00219634
MTPN	0.323043	0.00219634
RPL38	-0.259659	0.00219634
RAB39A	1.08996	0.00219634
FMNL2	-0.474048	0.00220077
SRGAP2B	0.584174	0.00220077
PHF20	-0.622626	0.00220258
RPL37	-0.284848	0.00221022
GBP4	0.515817	0.00221022
KTN1	0.329985	0.00221444
IFIT3	0.231226	0.0022173
CLSTN1	-0.308681	0.00222153
RPL15	-0.19745	0.00222153
WIPF1	0.510714	0.00222995
PNPLA6	-0.542209	0.00223086
S100A11	1.11228	0.00223086
SETD3	0.686769	0.00223086
UBE2L6	-0.238084	0.00223102
MPHOSPH8	-0.779317	0.00223556
RPL13	-0.469374	0.00224431
GLIS3	0.851615	0.00224502
SLC22A4	2.16421	0.00224502
TBCB	-0.56419	0.00224696
LETMD1	-0.870539	0.00225324
RCN2	-0.46631	0.00225783
FGFR4	1.16937	0.00225858
HSP90AA1	-0.247954	0.00226236
MAST1	-0.963339	0.00226817
BAZ2A	0.559747	0.00227202
MECP2	0.328043	0.00227725
TERF2IP	-0.382354	0.00227951
C1orf106	-0.454823	0.00228211
SLC25A29	-0.414941	0.00228306
RNF128	0.615039	0.00228313
GLDC	-0.373136	0.00228313
FUS	0.267227	0.00228323
ABHD8	-0.973921	0.00228707
SLC35A3	1.31188	0.00228743
SP100	0.611457	0.00228747
CAPZA1	-0.496664	0.00228747
ACAP3	-0.301704	0.00228747
NUP210	0.210573	0.00228747
FHOD3	0.652901	0.00228747
USP1	0.335671	0.00228747
CRELD1	-0.990808	0.00228747
RP1-102K2.8	2.28489	0.00228747
PSMD4	-0.359632	0.00228754
GNPNAT1	0.680292	0.00229847
OSBPL8	0.450678	0.0023014
RP11-766F14.2	1.06458	0.0023014
TCF7L2	-0.992772	0.00230947
DNAJC12	-1.19575	0.00232236
SEC63	0.37116	0.00232391
ENTPD7	0.930878	0.00232671
COL6A2	0.619769	0.00233585
HEG1	-0.3722	0.00233585
CADM1	-0.438286	0.00233615
CRTC3	0.650891	0.00233635
CRMP1	-0.232727	0.00235194
TMEM121	-0.688713	0.00235268
DGKD	0.497012	0.0023548
LINC01003	-0.996701	0.00235716
BRMS1	0.614457	0.00236292
PHTF2	0.812106	0.00236315
TAB1	-0.482214	0.00236315
SENP6	0.540896	0.00236315
NKD1	-0.748411	0.00236315
PCDH1	1.18148	0.00236315
SDC3	0.785559	0.00236409
CHERP	0.32057	0.00236859
RP1-283E3.4	-0.957364	0.00236859
ACPL2	0.750163	0.00237094
ZFPM1	1.88254	0.00237465
GALNT18	2.22409	0.00237466
UBXN1	-0.533048	0.00237466
DHX33	0.379333	0.00237502
PRKACA	0.465732	0.00237927
ZNF316	0.2973	0.00237927
PALM2-AKAP2	2.56237	0.00238042
IQGAP3	-0.773656	0.00238042
SPSB4	-0.689615	0.00238102
VCP	0.226358	0.00238418
MLC1	-0.323175	0.00238755
ZNF142	0.633969	0.00239049
CDK13	0.424685	0.00239917
TPR	0.357467	0.00240236
LMTK2	0.438875	0.0024028
STEAP3	1.04111	0.00240369
HSF4	-0.704386	0.00241288
GDF15	2.95338	0.00241288
CXCL9	1.59951	0.00241705
NOA1	-0.614838	0.00242214
SLC35E2	-0.715084	0.00242375
LINC00707	3.75622	0.00242375
PSMD1	0.393946	0.00243147
GNG2	-0.71295	0.0024422
STX10	-0.916869	0.00244321
PIK3AP1	0.412801	0.00244321
ARFGEF1	0.655244	0.00244461
FKBP4	-0.271225	0.00244899
LRRC17	-1.07295	0.00244899
RASSF10	-0.665919	0.00244899
FAM135A	0.831153	0.00244942
CRK	0.47957	0.00244942
SEC16A	0.328412	0.00245037
LMO1	-1.60181	0.00245037
HMGCL	-0.887111	0.00245755
FZD6	0.971562	0.00245755
GGN	1.71269	0.00247887
NRGN	0.647891	0.00248239
NLRC5	0.508067	0.0024835
TACC1	1.4588	0.0024835
NEB	2.51497	0.00249636
CDKN2B	1.52997	0.00249809
SPATA13	0.581822	0.00249809
SLC43A1	-0.997812	0.0025074
MYSM1	0.707415	0.0025074
ZNF618	0.352604	0.00251209
FRYL	0.811314	0.00252684
C12orf5	0.849019	0.00252684
PSKH1	-0.568921	0.00252684
TH	2.68497	0.00252684
CACNG8	0.725931	0.00252742
TNFRSF1B	1.20127	0.00253971
LPL	1.01962	0.0025437
PTK2B	1.66294	0.00254646
AASDHPPT	-0.952672	0.00254952
LRP4	-0.357345	0.00255271
RPL35	-0.188765	0.00255271
STK39	-0.459053	0.00255271
TTC24	2.78339	0.0025565
SPR	-0.760253	0.00256273
AFF3	1.85275	0.00257072
SMARCA1	0.478031	0.00258135
EAF1	0.511542	0.00258135
TRIM44	0.930526	0.0025824
TRANK1	-0.358411	0.00259288
FAM60A	-0.354497	0.00259708
ADPRHL2	0.561026	0.00259977
WDFY2	0.949353	0.00260376
ANKRD50	0.638709	0.00260376
AMER1	0.639765	0.00260376
MICU1	-0.540254	0.00260654
EAPP	-0.987892	0.00260654
RLIM	0.298608	0.00260654
RPS16	-0.208647	0.00261652
IVNS1ABP	-0.76966	0.00261828
TSC22D2	0.580637	0.00262486
SLC12A7	0.380575	0.0026291
RNF165	-0.601076	0.00263041
U2SURP	0.402998	0.00263041
ANKZF1	-0.677673	0.00263127
RP11-252A24.7	-0.908672	0.0026397
PTPRF	0.256567	0.00264338
SEC24A	0.800827	0.00264528
ING1	0.598194	0.00265124
PWWP2B	-0.608568	0.00265124
NUP205	0.328778	0.00265427
UBE2J2	0.530208	0.00265427
RP11-887P2.3	0.60254	0.00265427
KIAA1522	1.03276	0.00265599
CLRN1	0.969824	0.00265653
RNF26	-0.48103	0.00267061
ID3	-1.09234	0.00267166
LRRC4	0.886059	0.00267166
ABR	0.372581	0.00267166
TSR1	0.515582	0.00267166
ZHX2	-0.970287	0.00267166
LYPD6	-0.944611	0.00267166
RIPK1	0.597683	0.00267449
SEC24D	0.846025	0.00268057
BSDC1	-0.772718	0.00268057
MAP3K2	0.713282	0.00268057
CSPG4P13	3.49214	0.00268057
FGFR1	0.439047	0.00268372
PHEX	1.54936	0.00268739
FAM189B	-0.885251	0.00269233
PMF1-BGLAP	-1.37669	0.00269386
KIAA1161	-0.442519	0.00269447
HIBADH	-0.635241	0.00269652
S1PR3	0.571707	0.00269652
RP11-849I19.1	-0.907478	0.00269652
CRIPT	-0.966604	0.00269662
MPRIP	0.306565	0.00270027
ID2	-1.48452	0.00270718
KLHL7	-0.89231	0.00270718
LURAP1	1.61939	0.00271734
SMAP2	0.757736	0.00271769
VEGFB	-0.543945	0.00271977
KDM5B	-0.326249	0.00271983
GATA2	-2.88049	0.0027262
HNRNPUL2	-0.241252	0.0027262
QPRT	-0.504591	0.0027277
DCP1A	0.742002	0.0027277
RALGAPB	0.826547	0.00273059
SH2B2	-0.490443	0.00273436
ALDH3A2	-0.570523	0.00273505
C1orf198	0.441441	0.00273505
MAPK1IP1L	0.552129	0.00273505
LAMA2	2.64918	0.00273505
USP12	0.644935	0.0027384
ZC3H11A	-0.341689	0.00274069
NAA50	0.336509	0.00274069
PRDX5	-0.359246	0.00274069
NCOR2	0.461137	0.00274069
MAK16	0.640295	0.00274069
C1orf95	-1.1855	0.00274069
HEXA	-0.50351	0.00274305
SRRM1	0.553272	0.0027472
AFAP1	0.323354	0.00274792
GNAQ	0.442984	0.00275096
HMGN5	-0.77196	0.00275096
ACAT2	0.430092	0.00275389
MAP3K4	0.517008	0.00276356
NPLOC4	0.554814	0.00277479
RP1-193H18.2	-1.68351	0.00277621
HGS	0.344054	0.00278031
ATP6V0A1	0.996586	0.00278125
CEBPD	0.508956	0.00278125
HOOK2	-0.722726	0.00278372
DBNDD1	0.438059	0.0027849
TEAD2	-0.552492	0.0027849
PYGB	0.28898	0.0027849
KIAA1432	0.795235	0.0027849
KATNB1	-0.351009	0.0027849
GRIK3	0.427665	0.0027849
NOL6	0.363468	0.0027849
OLIG1	-1.7742	0.0027849
HELZ	0.561179	0.0027849
WI2-2998D17.2	1.25973	0.0027849
SQSTM1	-0.429287	0.00279268
TMTC2	-0.71998	0.00279268
HES4	-0.265543	0.00279268
ACVR2B	-0.495001	0.00279489
GCH1	0.977972	0.00280051
FBXW5	0.318827	0.00280291
ALDH6A1	-0.657711	0.00280472
GPX4	-0.276584	0.00281061
GCLM	0.822286	0.00281503
PLEKHG2	1.01748	0.00281503
IL6ST	0.658731	0.00281503
PIPOX	1.16244	0.00281503
RPUSD3	-0.755333	0.00281685
MPP6	0.670885	0.00281962
XAB2	-0.524382	0.00282232
OSBP	-0.346909	0.00282232
TMEM35	-0.991928	0.00282232
BST2	-0.24548	0.00282232
SEC31A	0.459202	0.00282232
ESYT1	0.406176	0.00282232
TATDN2	0.512648	0.00282232
ATP2B2	1.22259	0.00282232
ETS2	0.819633	0.00282232
SNHG14	0.487446	0.00282232
RNF208	-0.863974	0.00283589
FIP1L1	0.485061	0.00285304
CSRNP2	0.552289	0.00285451
STK17A	1.03143	0.00285451
TMEM189	0.874835	0.00285451
TGFB1I1	0.719605	0.00285777
EHD1	0.389851	0.00285961
NBL1	-0.52762	0.00286804
COBL	0.962206	0.00286835
CREB3L1	2.26386	0.00287385
RP11-326C3.2	2.81095	0.00287429
METTL13	-0.47217	0.0028749
FHDC1	0.628771	0.00287523
TMEM87B	1.49603	0.00288793
MEST	-0.12699	0.00288904
EFHC1	0.837568	0.00289484
LUZP1	0.645403	0.00289484
FUCA2	0.423649	0.0028962
SHD	-0.756371	0.00289729
SUV420H2	-1.00069	0.00289729
RHOBTB2	0.419944	0.00289872
ATP11C	0.527516	0.00289872
ZC4H2	-0.522872	0.00289872
RCBTB1	-0.738516	0.00289872
RPS8	-0.203012	0.00289872
FAF2	0.424352	0.00289889
EMP3	0.994098	0.00289889
CPLX2	1.54193	0.00289889
PLIN5	-1.51487	0.00289889
SYF2	-0.727491	0.0029032
CDC42EP1	0.908274	0.0029032
MNX1	-0.697085	0.0029032
NCOR1	0.359839	0.0029032
DNAH1	0.944762	0.00290921
PPAPDC2	-0.898569	0.00290921
MT-ATP8	0.506803	0.00290988
ELAVL1	0.325682	0.00291574
KLF12	-0.58968	0.00291574
ITPR2	0.52929	0.00291574
RNF122	-1.1389	0.00291574
ZDHHC12	-1.56122	0.00291574
PC	-0.724395	0.00291574
AC074212.6	-1.57269	0.00291574
CTB-175P5.4	-1.15215	0.00291574
PSPC1	0.3694	0.00291695
IARS	0.397991	0.00291695
PACSIN3	-0.736128	0.0029215
SRSF2	0.428082	0.00292976
CLNS1A	-0.435967	0.00293572
N4BP2L1	-1.06804	0.00293572
MED14	0.448123	0.00293572
PLXNB3	0.312858	0.00293572
DNM1	0.567301	0.00294206
RPL23	-0.227461	0.00294244
GAMT	-0.438662	0.00294244
TSPAN31	-0.735419	0.00294244
EDNRB	-1.89939	0.00294244
UBQLN4	-0.343007	0.00294781
C7orf61	-1.73247	0.00295118
SLC12A2	0.555403	0.00295595
HAS3	-1.50246	0.00295595
SAMD9	0.228498	0.00295595
SMOX	1.695	0.0029564
IGSF9B	1.18386	0.002961
TM7SF2	-0.745468	0.00296149
FAM208A	0.37642	0.00296149
INSM1	-0.258179	0.00296149
SEMA5B	-0.421429	0.00296503
CCSER2	0.576352	0.00296503
CEP41	-0.766514	0.0029693
PRDX2	-0.237122	0.00297555
KIAA0040	4.0835	0.00297555
FAXDC2	-1.70662	0.00297773
ARHGAP23	0.505637	0.00298001
MIEF1	0.485763	0.00298934
FKBP8	-0.377966	0.00299148
NPAS1	1.25813	0.00299148
FEM1B	0.34533	0.00299148
ARAP1	-0.651579	0.00299148
STT3B	0.322313	0.0029924
CDK2AP2	-0.767971	0.0029924
C1QTNF5	-1.11101	0.0029924
GTSE1	-0.459935	0.00300462
PTHLH	2.96904	0.00300462
DLL3	-0.530856	0.00300462
UTP3	0.575402	0.00300462
CNPY4	-0.744326	0.00300625
EIF4G1	0.381172	0.00301265
RENBP	-0.960373	0.00301338
MAPK1	0.372336	0.00301781
CLOCK	0.665915	0.00301819
ST3GAL6	-1.01231	0.00301875
USP16	0.665486	0.00301875
LRRC53	3.18836	0.00301962
MLLT4-AS1	-1.41891	0.00301962
TARS	0.370575	0.00302096
DHRS3	-2.65425	0.00302184
BRWD3	0.47508	0.00302823
EMP2	0.568222	0.00303613
PHRF1	0.275534	0.00304139
TMEM261	-0.729581	0.00304574
NUP188	0.346881	0.00304839
SLC25A28	0.608293	0.00305108
EP400NL	0.938128	0.00305255
OTX1	-0.536734	0.00305264
SGMS2	4.0522	0.00305264
TREH	4.11901	0.00305482
NSDHL	0.399298	0.00305708
AHCTF1	0.878405	0.00305828
WDR45B	0.387206	0.00306074
CSNK1E	-0.295866	0.0030627
COG4	-0.448237	0.0030667
ATXN1L	0.520795	0.0030667
FANCE	-1.0698	0.00307292
ZFYVE1	-0.976999	0.00307292
ITGB5	-0.810306	0.00307777
EPPK1	2.33462	0.00308822
NADK2	-1.17307	0.00309192
ENTHD2	-0.719446	0.00309286
USP36	0.600292	0.00309302
RNF112	-1.10747	0.00309409
CCDC28A	-1.31547	0.00309606
SH3GLB1	0.432609	0.00309837
EFS	-0.732927	0.00309837
AARSD1	1.32964	0.00309837
FAM131A	0.809454	0.00309845
GTPBP4	0.797678	0.00310288
TAGLN	2.2844	0.00310668
CAMSAP3	-1.26205	0.00310701
NCALD	-1.07264	0.00310701
GLS	0.733527	0.00310701
FRMD5	0.565021	0.00310701
POLD1	-0.320712	0.00311048
ZNF687	-0.347676	0.00311048
EIF4A2	-0.322426	0.00311114
C2CD5	-0.535701	0.00311161
ALDH4A1	-0.607157	0.00311161
TBCA	-0.318411	0.00311161
SAPCD2	-0.450357	0.00311161
C4orf48	-0.559824	0.00311161
CDO1	-0.890075	0.00311175
USP22	-0.230731	0.00311205
SRCRB4D	1.61861	0.00311216
MEX3A	-0.232076	0.00311216
ISG20	0.7007	0.00311556
TUBB2A	0.380556	0.00311662
CCDC88C	-0.481533	0.00311683
DUSP26	-1.20059	0.00311683
MYL12A	0.883159	0.00312081
MORC3	-0.589459	0.00312081
TAF6L	-0.652162	0.00312171
TRIM21	0.49177	0.00312622
GALNT2	0.323825	0.00312622
PM20D2	0.761047	0.00312622
PA2G4	0.538462	0.00312622
NAP1L1	-0.219603	0.00312622
SOX21-AS1	0.420566	0.00312622
PAPD7	0.45096	0.00313187
FOXP4	-0.518314	0.00313325
INTS3	-0.301839	0.00313325
CNKSR2	0.489478	0.00313469
IER5	0.278371	0.00314468
PI4K2B	0.625433	0.00314709
ELK4	0.833229	0.00314709
IFT140	-0.503219	0.00314709
KIAA1147	-0.444113	0.00314709
HSD11B2	-1.59507	0.00314812
VKORC1L1	0.349969	0.00314812
FAR1	0.423625	0.00314812
CDKN1A	2.15846	0.0031528
TTC39B	1.06262	0.00315323
TRAF6	0.966081	0.00315323
AKIRIN1	0.741037	0.00316596
HMMR	-0.920079	0.00316618
ATG2A	-0.419019	0.00316618
PRDX1	-0.269624	0.00316618
CEP350	0.642789	0.00316618
FAM69C	-1.55662	0.00316618
CPNE4	1.41583	0.00316618
GTF2IP1	-0.456901	0.00316618
RASL12	4.94299	0.00316838
AKAP9	-0.39542	0.0031687
ZFHX3	0.984845	0.0031687
SP3	0.551773	0.0031687
RP11-20I23.8	0.806016	0.0031687
USP38	0.6029	0.00317319
CORO2B	0.363275	0.00317467
HSPA9	0.350833	0.00317467
AC114730.3	-2.2614	0.00317467
TXLNA	0.492201	0.00317538
ABCA2	0.325716	0.00318005
RRP7A	0.423753	0.00318005
PRC1	-0.655897	0.00318056
CGN	1.13088	0.00318691
IQGAP2	0.695175	0.00318759
PTPRZ1	0.266859	0.00319079
SON	0.519223	0.00319079
RLF	0.641745	0.00319565
UBA6	0.456583	0.00319651
FLVCR1	0.699325	0.00319651
PTX3	0.668875	0.00319651
ZBTB12	-1.11314	0.00319677
TRMT6	0.672309	0.00319827
SOCS6	0.618403	0.00319883
AHNAK2	1.86103	0.00320266
FNBP4	0.517929	0.00322336
TMEM106B	-0.575659	0.00322367
U2AF2	0.257735	0.00322675
SERBP1	0.265602	0.00322675
TSC22D3	-1.18753	0.00322675
PTPRA	-0.508665	0.00323342
LONRF3	1.19561	0.00324029
DPF3	0.997402	0.0032427
TSNARE1	-0.98153	0.00324826
SRPR	0.485372	0.00324826
KPNA4	0.380575	0.0032574
ZNF207	0.304871	0.00326298
ACHE	1.3818	0.0032672
AC139100.2	-2.35754	0.00327052
XPO4	0.475354	0.00327608
MAP4K3	0.799126	0.00328195
MEGF9	-0.507124	0.0032849
AGO1	0.368682	0.00328809
DLX2	-0.981379	0.00328809
PANK3	0.454057	0.00328809
NEURL1B	0.316705	0.00328852
POMT2	-0.423503	0.0032899
CHUK	0.590212	0.0032899
RPL24	-0.207169	0.00329613
RASSF5	1.4992	0.00330077
RUNX3	2.47956	0.00330869
SAMD9L	0.825288	0.0033089
PSTPIP2	0.908644	0.00330941
TYRO3	-0.387091	0.0033118
POLA1	-0.325905	0.0033118
USP15	0.697306	0.0033118
KIAA1033	0.455318	0.0033118
TMUB1	-0.593603	0.0033118
FRS2	0.631419	0.0033118
SEC11C	-0.443947	0.0033118
IRF2BP2	-0.505038	0.0033118
SLX4	0.563199	0.0033118
HMGN2	-0.220391	0.0033118
MLLT4	-0.504921	0.00331225
NAF1	0.63243	0.00331225
MTHFSD	-0.640763	0.00331303
TP53INP2	0.571846	0.00332208
USP28	-0.58501	0.00332256
RPL35A	-0.23667	0.00332972
CNPPD1	-0.697483	0.00334199
SCD5	0.408297	0.00334199
SMARCA5	0.262351	0.00334199
RPL39P3	-0.431552	0.00334199
TUBBP1	0.409591	0.00334684
ASAP3	-0.650196	0.00334812
BLOC1S2	0.671178	0.00335363
HIST2H3A	-1.80938	0.00335363
HES7	-1.85589	0.00337071
FOXO4	-1.61552	0.00337071
RP11-134G8.8	1.70236	0.00337071
RP11-149I9.2	4.06959	0.00337263
STOX2	-0.983784	0.00337382
STRN3	0.627093	0.00337466
GRIN2B	2.1449	0.00337466
NT5DC3	0.620967	0.00337602
PITPNM1	-0.334736	0.00337769
RRP36	0.547766	0.00337769
GRIK4	1.06141	0.00337769
TMEM43	0.49818	0.00337769
POU3F4	-0.587719	0.00337912
HUWE1	0.342979	0.00338808
AGTRAP	-0.532811	0.00339824
AC018730.1	-1.43368	0.00339824
GPATCH4	0.497684	0.00339862
KLHL29	0.950078	0.00340584
SRGAP2	0.276824	0.00340584
CYFIP2	0.802334	0.00340674
TAF2	0.55906	0.00341616
SGTA	0.265148	0.00341616
C19orf57	-0.832801	0.00341616
HES6	-1.01676	0.00341616
VPS11	-0.549453	0.00341616
HMGB2	-0.41044	0.00341616
PCGF5	0.409039	0.00341616
MT-ND2	0.105036	0.00341616
C17orf62	-0.403138	0.00341656
ACTN2	2.03123	0.00341926
TIA1	-0.381982	0.00342464
ARL6IP4	-0.458028	0.00342464
LARP1B	0.877316	0.00343196
ANKRD33B	1.02226	0.00343196
HRSP12	-0.944977	0.00343273
ATP6AP1	-0.232717	0.00343286
LAMB1	0.243833	0.00343885
PDE4DIP	-0.407992	0.00343974
CENPQ	-1.00071	0.00344586
CCDC151	-1.8386	0.00344586
MCM5	-0.280849	0.00344629
ANO8	-0.354524	0.00344873
ABHD4	-0.798401	0.00344873
COLGALT1	0.2849	0.00344873
GLRB	-0.976506	0.00344898
CELF1	0.270635	0.00344898
KANSL1	-0.527003	0.0034522
ASB6	0.551287	0.00345458
NDUFB11	-0.299907	0.00345775
DYRK1B	-0.942271	0.00345993
PCED1A	-0.368737	0.0034684
AKAP2	0.866908	0.00347096
PHKB	-0.595104	0.00347284
SNRPB	0.194184	0.00347717
OPRL1	-1.74668	0.00348232
PITPNA	0.602422	0.00348358
YLPM1	0.465398	0.00348382
ADAMTS7	0.298382	0.00348766
RMI2	-1.0528	0.00348766
CRB1	-1.06738	0.00348773
AGPAT3	0.403927	0.00348773
RPL17-C18orf32	-0.656777	0.00348773
GTF2IRD1	-0.417597	0.00348972
LIN7A	1.13552	0.00348972
ACO1	0.853499	0.00348972
FGD3	-1.77784	0.00348972
SAP30	-0.599467	0.00348972
ZBTB44	-0.743512	0.00348972
CD320	-0.337884	0.0034902
CYP51A1	0.662387	0.00350373
FADD	0.643066	0.0035065
SPTBN1	0.254741	0.00350941
ASH1L	0.439389	0.00350941
NLGN4Y	1.26019	0.00350941
LIN52	-0.872942	0.00350941
RAB12	0.557493	0.00350941
PBK	-1.06454	0.00352305
NUF2	-0.837877	0.00352425
RAB36	0.659344	0.00352875
RAB7L1	-0.577025	0.00352875
STX16	-0.344551	0.00352875
USP6NL	0.54403	0.00352875
PRNP	0.490328	0.00353523
RP11-395G23.3	0.900194	0.00353574
F2R	-0.312502	0.00353688
RP11-120J1.1	-2.08511	0.00353936
EEPD1	0.952428	0.00354384
SULF2	0.790899	0.00354384
RN7SKP275	2.35913	0.00354843
GTF3C4	0.359292	0.00355707
RPL11	-0.157445	0.00356102
DENND5B	0.436718	0.00356119
RSAD1	-0.800268	0.0035624
FAM199X	0.348372	0.00357191
BCAT1	0.411992	0.00357282
SERPINF1	-0.26703	0.00357282
[truncated: 4,766 more rows]

## Sheet: logFC>=0.8
Gene_Symbol	log_Fold_Change	FDR
GTF2H4	10.3229	0.00209525
TUBB3	9.32055	0.00386002
AC069287.1	6.71474	0.000460916
RP11-554I8.2	6.44604	0.0052257
EMP1	6.18383	0.000838383
KCNJ5	6.11704	0.000989028
AC006486.9	5.71726	0.0082307
SERPINE1	5.33198	0.000540185
METTL7B	5.27878	0.000136998
XIRP1	5.25622	0.000308727
IGFBP1	5.13797	0.00209525
RASL12	4.94299	0.00316838
NFATC2	4.90493	9.13306e-05
NPR1	4.87628	0.0176828
TNFRSF12A	4.87607	5.21194e-05
LINC00941	4.86503	0.00208744
IL6R	4.8596	0.000253008
KITLG	4.84376	0.00184041
PITPNM3	4.61265	0.00085862
DOK7	4.59762	0.000358738
RP11-706J10.3	4.52741	0.00426776
TMEM132E	4.44382	0.0224201
STAC2	4.37199	0.000620391
PSORS1C1	4.37061	0.024786
DLC1	4.35026	0.00135115
PPL	4.27036	0.000668439
ADAMTS16	4.20842	0.00209525
IFNL2	4.17742	0.00153584
S100A2	4.14187	0.000226525
TREH	4.11901	0.00305482
HRH1	4.11051	0.00383538
KIAA0040	4.0835	0.00297555
RP11-149I9.2	4.06959	0.00337263
PHLDA2	4.06635	0.000109216
FLNC	4.06071	0.000117416
IL11	4.05707	0.00110934
SGMS2	4.0522	0.00305264
IL4R	4.04524	0.032203
SYT12	4.0413	0.000146336
AC006014.7	3.93976	0.0460167
RPP14	3.92078	0.0410473
RP13-608F4.5	3.88337	0.00151822
AC147651.4	3.8444	0.0149045
ELFN1	3.80276	0.000841302
LINC00707	3.75622	0.00242375
AC004158.3	3.7192	0.00834862
MYPN	3.67201	0.00687419
PTPRE	3.64527	0.00365396
THBS1	3.54463	0.000455155
VGF	3.54137	2.18497e-05
CLCF1	3.53661	0.00209525
CAMK2A	3.51779	0.000119764
MAN1A1	3.51012	0.00808131
CSPG4P13	3.49214	0.00268057
ABCA12	3.3923	0.00156079
SPOCD1	3.38609	0.000688583
ITK	3.3822	0.00376805
SLC30A3	3.35941	0.0129187
BDNF	3.3566	0.00845858
PDGFB	3.35178	0.000816214
RP1-122K4.2	3.33997	0.0104786
KIAA1199	3.31052	0.000358738
SPRED3	3.30469	0.000289937
ZNF365	3.30202	0.000430228
BTBD19	3.28975	0.00124224
KRT80	3.2783	0.000709615
FOSB	3.25621	0.00108765
EGR3	3.21202	0.000358738
S100A3	3.20459	0.00187689
LRRC53	3.18836	0.00301962
KCNF1	3.16688	5.69003e-05
DUSP6	3.1649	0.000613606
TPST2	3.12611	0.0114256
PTCHD4	3.11823	0.000540185
MPV17L	3.11407	0.00444592
HIVEP3	3.0997	0.00215021
FOSL1	3.08772	0.000216511
SYNPO	3.0865	0.000109216
RP5-884M6.1	3.07861	0.00789777
KCND3	3.07691	0.000888083
CD44	3.04867	0.000823928
HBEGF	3.04402	0.000362166
UCN2	3.03938	0.0045513
GPR158	2.99726	0.00039961
LGI2	2.97157	0.00376554
PTHLH	2.96904	0.00300462
SSTR3	2.96172	0.0119564
ETS1	2.9595	0.000270016
GDF15	2.95338	0.00241288
GPR3	2.9526	0.00039227
RP11-2E17.1	2.94198	0.00140829
CTA-445C9.15	2.92962	0.00117649
IL1RAP	2.89458	0.00187156
FAM196A	2.89401	0.000416835
RGS6	2.89099	0.000412108
ARSI	2.88467	0.000253008
PTRF	2.87278	5.21194e-05
LGR6	2.8556	0.000518643
C21orf62	2.85361	0.000274898
AC005789.11	2.85251	0.000742012
EGR1	2.84666	0.000226525
SNCB	2.83824	0.0082307
RP11-1008C21.2	2.82759	0.00160124
SOCS2	2.8265	0.00124853
PCDHGC4	2.82352	0.00396769
RP11-326C3.2	2.81095	0.00287429
NR4A3	2.7848	0.00100302
TTC24	2.78339	0.0025565
AKAP5	2.7626	0.00219062
INPP5D	2.73473	0.000892788
CISH	2.72768	0.000540185
WHAMMP2	2.70946	0.0090551
LINC00961	2.70394	0.0199063
LONRF2	2.68702	0.000224848
AC093673.5	2.68666	0.000438773
TH	2.68497	0.00252684
TMEM217	2.68119	0.0101866
BEGAIN	2.66574	0.000308727
TRAC	2.65877	0.00542929
AC016735.2	2.65092	0.0183847
LAMA2	2.64918	0.00273505
LIF	2.64152	0.000364746
CPA4	2.63113	0.00169335
KRT17	2.62887	0.0311071
ARC	2.62602	0.000139284
CYR61	2.61014	0.000288019
VDR	2.58879	0.0053887
KIAA0513	2.57907	0.00182569
FSCN2	2.57558	0.00960333
DCLK1	2.56835	0.000364746
LYST	2.56768	0.000456324
PALM2-AKAP2	2.56237	0.00238042
PCDHGC5	2.5519	0.00805898
RBM47	2.53495	0.00931615
SYTL5	2.52052	0.000994764
NEB	2.51497	0.00249636
ANXA1	2.5096	0.000153678
NGEF	2.5046	0.00216622
SH3TC1	2.49893	0.000809373
KLF5	2.49331	0.000390564
GAP43	2.49294	0.000142761
XXbac-B461K10.4	2.48584	0.0011609
ETV4	2.48581	0.000308727
RUNX3	2.47956	0.00330869
FOSL2	2.46012	0.00010286
MYO7A	2.45373	0.00128686
FILIP1L	2.44916	0.00205976
CMKLR1	2.43988	0.000816214
ARHGAP25	2.43718	0.0443454
CTGF	2.43269	0.000216511
AHNAK	2.41942	0.000334477
ARHGEF4	2.41716	0.00104551
GJB2	2.41494	0.00593756
KIAA1211L	2.39198	0.000142761
CRYBB1	2.38835	0.0152236
CHRNA9	2.38597	0.000358738
PLAT	2.38557	0.000661138
ATXN1	2.3696	0.000161297
DGKG	2.36827	0.000509404
CUBN	2.36507	0.000516647
REL	2.36494	0.0153444
RN7SKP275	2.35913	0.00354843
CTC-786C10.1	2.35742	0.00514697
HS3ST3A1	2.35608	0.00219089
NKTR	2.34886	0.000334477
NAV2	2.34686	0.00060621
F2RL1	2.34371	0.00159461
CDKL5	2.34129	0.022871
EPPK1	2.33462	0.00308822
SNED1	2.33154	0.00090217
ZNF469	2.33146	0.00010431
SPRY4	2.33123	0.000292854
IFITM10	2.32344	0.00404825
ZYX	2.31785	0.000117416
KIAA2022	2.30729	0.0041127
BATF3	2.30719	0.00187156
VAV3	2.28756	0.000688583
ASS1P12	2.28725	0.00519613
RP1-102K2.8	2.28489	0.00228747
TAGLN	2.2844	0.00310668
SPRED1	2.28117	8.89335e-05
CREB3L1	2.26386	0.00287385
RP11-644F5.10	2.26113	0.0178856
RPE65	2.26068	0.0387487
SERPINB8	2.25543	0.00933047
C10orf67	2.25038	0.00600157
NEURL	2.24958	0.00193013
SHROOM2	2.24879	0.000251465
ARHGAP29	2.24803	0.000172903
RGS17	2.24569	0.0011609
MRPS31P5	2.23742	0.00519285
PDCL3P5	2.23143	0.00853063
C12orf79	2.22978	0.0201669
GLIPR1	2.22869	0.000876483
GALNT18	2.22409	0.00237466
RP1L1	2.22229	0.00716095
ELF4	2.22075	0.000429713
GAPDHP14	2.22071	0.0146558
DUSP5	2.21558	0.000227991
KCNN3	2.21497	0.000518643
HRCT1	2.21429	0.00377761
RAPGEF3	2.20574	0.000982279
PDE3A	2.20358	0.0020034
PRR5	2.20116	0.0206185
OVGP1	2.2005	0.016637
KCNIP1	2.18982	0.00137813
RP11-292B8.1	2.18409	0.00913496
MIR4435-1HG	2.17862	0.0011302
MICALL2	2.17647	0.000305174
EDA2R	2.17626	0.000530147
AC096677.1	2.17182	0.00119134
LOXL4	2.16828	0.000730724
SLC22A4	2.16421	0.00224502
AC046143.3	2.16388	0.00520447
CDKN1A	2.15846	0.0031528
CD274	2.15528	0.00115829
S100A16	2.14937	0.000309432
GRIN2B	2.1449	0.00337466
FAM83G	2.14209	0.00084857
CHST8	2.14191	0.00164491
TGM2	2.14033	0.00381559
HAP1	2.13555	0.00038545
FAM65B	2.1344	0.000412108
TFPI2	2.13245	0.000460916
SVIL	2.12667	0.00608804
LMNA	2.12494	0.000165746
CA13	2.1159	0.0199405
PDLIM4	2.11143	0.000161297
POM121B	2.1111	0.000364746
CARD10	2.10547	0.000292854
ETV5	2.09981	0.000119764
PDGFA	2.09471	0.000603522
BRINP2	2.08347	0.0200927
ASB2	2.07987	0.0297576
PCDH19	2.07249	5.21194e-05
MAMLD1	2.05296	0.00185315
LRRC10B	2.0512	0.00138079
MKLN1	2.04805	0.000749281
IFNL1	2.04712	0.00145662
MIR22HG	2.04551	0.025792
WNT7B	2.04488	0.00632025
CCDC19	2.03762	0.00960333
ACTN2	2.03123	0.00341926
SOCS2-AS1	2.02794	0.00375042
SPHK1	2.02423	0.000393524
SYNJ2	2.02323	0.000280467
MCHR1	2.01392	0.00789942
PPM1J	2.0037	0.0247226
TRPM8	1.99495	0.000749463
RRM2B	1.99445	0.000413861
ERVW-1	1.99008	0.00411975
CCL2	1.98853	0.000196482
SOCS3	1.98145	0.000335755
CICP22	1.97119	0.00581194
SH2B3	1.94874	0.000139284
PIK3CD	1.94667	0.0153002
PLAU	1.94343	0.000582065
PCDH10	1.93775	0.00516402
MAP2K3	1.93737	0.000309432
CACNG5	1.93597	0.000688583
RP4-782G3.1	1.93472	0.00485601
TATDN2P2	1.9133	0.00209525
SCG2	1.91238	9.13306e-05
CCND1	1.91174	9.13306e-05
RP1-74M1.3	1.90602	0.000739367
LINC00473	1.90425	0.0175633
CSRNP1	1.90266	0.000390564
CHST2	1.9024	0.000621542
CD109	1.90144	0.00507406
IL27RA	1.90032	0.000582065
AIM1	1.89163	0.00167769
SGPP2	1.89145	0.0114203
ASPHD2	1.88363	0.000335755
ZFPM1	1.88254	0.00237465
PHYHIP	1.87743	0.0283589
RP11-571M6.8	1.86576	0.00368105
PTPRN	1.86376	0.00417054
RP11-284F21.10	1.86345	0.0011609
AHNAK2	1.86103	0.00320266
RDH5	1.86079	0.00449764
RP1-151F17.1	1.85436	0.0320509
SDC4	1.85351	0.000364746
AFF3	1.85275	0.00257072
AQP3	1.85037	0.00948049
C3orf52	1.84829	0.00467396
ADAMTS3	1.84749	0.000715792
HR	1.84556	0.000147271
HSD17B3	1.84268	0.00703989
JPH1	1.8425	0.000847554
PDGFRA	1.84125	0.0386404
DNMBP	1.83501	0.000196482
TFEB	1.83422	0.000593721
INPP1	1.83295	0.0010246
PITPNM2	1.82945	0.00045658
RHBDF1	1.82881	0.000518643
AP001610.5	1.82879	0.024433
ITGB8	1.82445	5.69003e-05
BEND3P3	1.81756	0.00677823
SPAG1	1.81614	0.00184953
NFATC1	1.81529	0.0270084
SHC4	1.81511	0.00109309
APOL4	1.81484	0.0183847
ITGA3	1.81426	0.000413861
GPR139	1.80631	0.00110881
HSPB3	1.80094	0.00718907
RASSF8	1.80034	0.000283562
AMIGO2	1.79996	0.0128244
LEPREL1	1.79865	0.000814872
OXTR	1.79259	0.00453788
JAG1	1.78726	9.13306e-05
FAM83F	1.78723	0.00893312
CNTF	1.78455	0.0169974
BMP8B	1.78361	0.00060621
ME1	1.78291	0.00475436
KIAA1755	1.77707	0.0105526
CAMK2D	1.77011	0.00024423
RP11-1277A3.2	1.76568	0.0308103
CSPG4	1.76381	8.89335e-05
CAPRIN2	1.76377	0.00156079
STARD8	1.75791	0.00117649
CX3CL1	1.75784	0.00084929
MED12L	1.75717	0.000420751
NXPH3	1.75191	0.00546545
IFNB1	1.7471	0.00206039
FRMD8	1.74674	0.000771693
AC064875.2	1.74458	0.00680261
C1orf220	1.74434	0.0116226
CRABP2	1.737	0.000927138
METRNL	1.73567	0.000359035
RAPH1	1.73407	0.00128686
CNN2	1.73294	0.00835154
HOMER1	1.72792	0.000681283
LPP	1.72006	0.000742012
CAMK2B	1.71464	0.0010056
GGN	1.71269	0.00247887
AC012512.1	1.70889	0.00527056
TTLL10	1.70611	0.0168926
RP11-134G8.8	1.70236	0.00337071
EPHA1	1.69976	0.00634008
SEZ6	1.69886	0.0014321
SMOX	1.695	0.0029564
DGCR5	1.69466	0.00121079
HNF4G	1.69403	0.0422928
EVA1C	1.69101	0.014797
SPTSSB	1.68912	0.0159005
IDS	1.68519	0.000124465
DGCR9	1.68369	0.00711034
ADAMTS15	1.67655	0.000460916
CA2	1.67549	0.00605294
MMP25	1.67244	0.00746714
TLR4	1.66953	0.00076279
RP11-15J10.1	1.66871	0.0462526
RNF19A	1.66695	0.000413861
STK32B	1.66317	0.000142761
SPRY1	1.6631	0.00660629
PTK2B	1.66294	0.00254646
TNC	1.66229	5.21194e-05
RIN1	1.66131	0.000460916
TUBA4A	1.65804	0.00582264
RASAL1	1.6568	0.00835154
ACOX2	1.6568	0.00560377
MAP3K7CL	1.65658	0.00528131
CYP1B1	1.65578	0.00159602
C12orf68	1.65412	0.00154713
EGFR-AS1	1.64431	0.00190794
B4GALNT3	1.64414	0.0011609
MAFF	1.64396	0.000917251
RP11-277P12.20	1.64106	0.00945614
THSD1	1.64046	0.000830411
CHST11	1.63819	0.0115384
RPS6KA3	1.63411	0.000117416
TMTC1	1.62672	0.00028979
ACER2	1.62598	0.0274777
COBLL1	1.6242	0.00183569
UBTD1	1.62401	0.000187124
DGKH	1.62392	0.00702121
LZTS1	1.62196	0.000119764
LURAP1	1.61939	0.00271734
SRCRB4D	1.61861	0.00311216
FMNL3	1.61775	0.000621542
BAI1	1.61634	0.000119764
LYPD1	1.61546	0.00637661
BST1	1.61177	0.0073606
NEK6	1.61016	0.000497412
RP11-512M8.3	1.60985	0.0352127
ITPKC	1.60971	0.000238273
GADD45A	1.60961	0.000161297
PDK1	1.60961	0.00162682
PHLDA1	1.60405	8.89335e-05
CXCL9	1.59951	0.00241705
CNIH3	1.59877	0.000561958
P4HA2	1.59835	0.00140424
ILDR2	1.59636	9.13306e-05
NAP1L3	1.59301	0.00507841
CCR1	1.58835	0.0152167
GLCE	1.58279	0.000877611
CLCN5	1.58226	0.00132514
ACTN1	1.57995	0.000142761
MAEL	1.57749	0.0161233
AXL	1.5704	0.00620372
WARS	1.56575	0.000100574
SEZ6L	1.56257	0.00164235
CLIP2	1.56181	0.000117416
C2CD4A	1.55771	0.000867159
EXOC6	1.55405	0.00459734
OBSCN	1.55119	0.00526427
PHEX	1.54936	0.00268739
ABCC3	1.54922	0.0137094
OSBP2	1.5489	0.00157104
SDCBP2	1.54881	0.0217368
RFFL	1.54654	0.000460953
AC124309.1	1.54593	0.00911607
MAP3K9	1.54479	0.000974178
CPLX2	1.54193	0.00289889
RUNX1	1.54125	0.000270034
UBASH3B	1.54119	0.000159418
KCNK7	1.53728	0.0105765
KCNA2	1.53657	0.00131581
VSTM2L	1.53595	0.0196623
CTD-2047H16.4	1.53562	0.00162682
FAM131B	1.53281	0.000227991
CDKN2B	1.52997	0.00249809
PRSS23	1.52986	0.0369763
CCRN4L	1.52461	0.00192159
MKL2	1.52328	0.000760701
SLC2A3	1.52143	0.00144641
RRBP1	1.51996	0.00817792
AK4P3	1.51828	0.010214
GFAP	1.5175	0.000460916
RNMT	1.51534	0.00107082
MEF2B	1.51089	0.0265216
FHL2	1.50937	0.00174937
SHISA8	1.50898	0.00758025
SEMA7A	1.50862	0.000702156
AC010745.1	1.50674	0.0162019
SH3BP5	1.50529	0.000615559
RASSF5	1.4992	0.00330077
FSIP1	1.49773	0.0194635
BAIAP2-AS1	1.49633	0.000727114
TMEM87B	1.49603	0.00288793
F3	1.49006	0.00375823
LUCAT1	1.48812	0.0318417
NEDD9	1.48211	0.00132395
PMAIP1	1.48196	0.00689506
KCNK5	1.47703	0.00667335
EPHA2	1.47674	0.000177195
RP1-151F17.2	1.47639	0.0140493
SLC35E4	1.47589	0.000709615
HS3ST3B1	1.47548	0.000824015
ZNF660	1.472	0.00398198
TIAM2	1.47162	0.00116227
NGFR	1.46957	0.000696627
CEP170B	1.46838	0.000227991
TMEM158	1.46833	0.000157951
KCNK13	1.46806	0.009806
AUTS2	1.46713	0.000270016
LRRC8C	1.46372	0.0153002
ZC3HAV1L	1.46092	0.000822497
TACC1	1.4588	0.0024835
SPRY2	1.45867	0.000506998
SIPA1L2	1.45867	0.000292854
RP11-849H4.4	1.45827	0.0146262
RRAD	1.45486	0.00162682
CCL8	1.45442	0.0245392
LEMD1	1.45293	0.00455489
NUDT16L1	1.44936	0.00506326
ADNP	1.44799	0.000263368
DDB2	1.4477	0.000814872
CD82	1.44523	0.00581194
PCDH12	1.44336	0.0160569
ZNF778	1.44321	0.0165812
HIPK1	1.44274	0.000283562
LRRC48	1.44229	0.00521927
LINC00152	1.43685	0.0241081
S100A13	1.43626	0.000965313
TRAF1	1.42886	0.0289727
NFAT5	1.42886	0.0352142
ACTG1	1.42638	0.00110815
LINC01021	1.42575	0.0284012
PRKCD	1.42506	0.00194659
PGAM1P7	1.4244	0.00809528
ZFP36	1.42416	0.00716095
S100A10	1.42313	0.000516647
C2orf72	1.41964	0.000575832
CPNE4	1.41583	0.00316618
PTPN14	1.41484	0.000274849
PLK3	1.41401	0.000877611
RP11-732M18.3	1.41378	0.0422243
NEDD4	1.41233	0.000794965
OSMR	1.41188	0.0010056
AHR	1.40671	0.00161307
HOMER2	1.40261	0.00122785
ARID3B	1.40121	0.00560377
PMP22	1.39637	0.00371278
TNFRSF18	1.39474	0.0205963
PHLPP2	1.39321	0.000509404
TNS1	1.38905	0.000739345
DCBLD2	1.38761	0.000364746
CYP2E1	1.38761	0.0229863
RDH10	1.3855	0.000847554
ACHE	1.3818	0.0032672
ARPC4-TTLL3	1.38097	0.0181335
B4GALT5	1.38087	8.9937e-05
SYNE3	1.37818	0.0220976
ANKRD45	1.36789	0.0340562
SERTAD1	1.36732	0.000828644
CXCL11	1.36589	0.00045197
PGM2L1	1.36564	0.000758835
CCT6B	1.36504	0.0339527
CIITA	1.36446	0.00206296
ZCCHC12	1.36109	0.00191333
NCOA7	1.36089	0.000838345
RIMS2	1.35925	0.00839606
ABLIM1	1.35905	0.00833779
BAIAP2	1.35855	0.0011609
UNC5A	1.35653	0.00789942
ITGA7	1.35569	0.000129645
WTIP	1.3423	0.00401522
RP11-469M7.1	1.34031	0.00637215
BACH2	1.34025	0.00128686
AC092811.1	1.33923	0.017321
RGS20	1.33796	0.00466181
UBE2J1	1.33656	0.000334477
PLCD3	1.33653	0.00139559
CASP7	1.33629	0.000518643
WDR1	1.33001	0.000129645
AARSD1	1.32964	0.00309837
TCF7	1.3287	0.0259008
BZW1P2	1.32653	0.00956066
RP3-510D11.2	1.32574	0.0121058
KB-1732A1.1	1.32538	0.016433
FRMD4B	1.32072	0.000518643
SH3RF3	1.32041	0.000738503
WWTR1	1.31761	0.000109216
CPA2	1.31713	0.0196961
TRIB2	1.31396	8.45326e-05
FST	1.31382	0.00428382
GBP5	1.31207	0.00361019
SLC35A3	1.31188	0.00228743
NRIP3	1.31163	0.0213483
PPP2R3A	1.31032	0.0318912
SLFN12L	1.30922	0.0279017
FZD5	1.30386	0.000427683
PHLDA3	1.30185	0.000283562
CSNK1G1	1.30152	0.00076279
RP11-497H17.1	1.29927	0.0141993
ASCC3	1.29783	0.00144312
AC005594.3	1.29781	0.0149445
CCDC144B	1.29704	0.00169335
VCL	1.29681	0.000358738
SMC5	1.29649	0.000540185
CHGB	1.29426	0.011649
LOXL2	1.29317	0.00140282
IRF1	1.29068	0.000582065
LYNX1	1.29049	0.00196216
SYDE2	1.29035	0.0396803
SEMA4A	1.28724	0.0395837
FAM157C	1.28437	0.0309659
RP4-724E16.2	1.27939	0.0155552
FAM129B	1.27931	0.000256669
HRASLS	1.27527	0.0232217
PPP1R15A	1.27348	0.000459512
MALT1	1.26698	0.000635654
IL15RA	1.26551	0.00622894
TNIK	1.26544	0.000817746
ZBED6	1.2637	0.0011609
RP11-71N10.1	1.26338	0.0117815
NKD2	1.26328	0.0152167
ALPK2	1.26153	0.000745653
NLGN4Y	1.26019	0.00350941
WI2-2998D17.2	1.25973	0.0027849
SYN3	1.2596	0.0206281
PALM2	1.25873	0.0199452
NPAS1	1.25813	0.00299148
NUMBL	1.25804	0.000153678
C8orf46	1.25437	0.0467771
C11orf82	1.25424	0.0362082
RP11-284F21.9	1.25072	0.0159545
ZBTB38	1.2499	0.0158332
IL18BP	1.24975	0.0226591
UPP1	1.24617	0.0043513
RP11-82L18.4	1.24346	0.0163575
ATP13A3	1.24211	0.000335755
NID2	1.24131	0.00802425
SLC41A2	1.24021	0.00126176
SEMA3A	1.24005	0.000227991
ITGAV	1.2376	0.000282163
LGI3	1.23686	0.00855565
RBM3	1.23419	0.000809373
AGO2	1.23323	0.000482023
MDGA1	1.23271	0.00156619
EPHB2	1.23246	0.000351992
RYR3	1.22889	0.0016294
KIF21B	1.22721	0.00415801
PLEKHG1	1.22466	0.000661138
ATP2B2	1.22259	0.00282232
ICAM1	1.22148	0.00414039
SPRED2	1.21902	0.000460916
TNFRSF4	1.21756	0.0199429
KCNK10	1.2162	0.00126408
HVCN1	1.21599	0.00584289
DRAM1	1.2155	0.000998242
RASSF8-AS1	1.21298	0.0036476
HAS2	1.21255	0.0010056
LINC00391	1.21092	0.0207616
TBX21	1.20875	0.0233793
ZNF317	1.20802	0.000586572
NIPAL2	1.20702	0.00732804
TUBB6	1.20547	0.00726426
GPR153	1.20547	0.000283562
ZNF398	1.20529	0.000688583
FAM178A	1.20347	0.000349525
LDLR	1.20312	0.00085862
TFAP2E	1.20297	0.0148566
MIAT	1.2025	0.00010286
MYLK4	1.20171	0.0208957
TNFRSF1B	1.20127	0.00253971
CD63	1.20105	0.000771693
AMMECR1	1.20014	0.000480363
CAMKK1	1.1999	0.00600271
CXCR4	1.19661	0.000560644
LONRF3	1.19561	0.00324029
SHC3	1.19554	0.000907648
ZMAT3	1.1915	0.000460916
RP11-536C5.7	1.18903	0.0180419
GPR135	1.18778	0.0280734
SH2D5	1.18582	0.0048884
MRPS17	1.18538	0.0303777
TRIO	1.18529	0.000280468
IGSF9B	1.18386	0.002961
CTD-2636A23.2	1.18221	0.0174822
PCDH1	1.18148	0.00236315
GRIA3	1.18078	0.00132514
LINC00106	1.18034	0.0475381
SRSF12	1.18006	0.00156079
SH3RF3-AS1	1.17993	0.024425
SP140L	1.17903	0.00133427
TTC9	1.1787	0.00143393
MYH9	1.17697	8.89335e-05
CPEB2	1.17647	0.00146044
PKDCC	1.17631	0.00590468
DOT1L	1.17529	0.000124465
GPD2	1.17477	0.000739345
PCDHGA9	1.17235	0.034194
FGFR4	1.16937	0.00225858
LINC00630	1.16869	0.0371784
BIRC3	1.16838	0.00518778
SH3BP1	1.1681	0.00111008
SYT7	1.16757	0.0222837
TMPPE	1.16664	0.0168019
STK10	1.16597	0.000460916
C6orf118	1.16478	0.0408015
PIPOX	1.16244	0.00281503
AC027612.4	1.1624	0.0115082
EGFR	1.1611	5.21194e-05
RPL23AP53	1.16011	0.00671197
BAK1P1	1.15592	0.0115512
ERRFI1	1.15501	0.00441364
STK40	1.15318	0.000200772
NRP2	1.15297	0.000985727
WT1	1.15284	0.00526722
SGK223	1.15259	0.000746019
CH25H	1.15203	0.00627335
PTPRG	1.15009	0.000359035
RAB23	1.14951	0.00179388
VGLL2	1.14901	0.0224945
RP11-461A8.4	1.14873	0.0213353
FAM157A	1.14664	0.0197344
TSN	1.1466	0.0135704
FMNL1	1.1422	0.0308072
CRLF1	1.14071	0.0315976
SPSB1	1.13792	0.00638128
ZNF827	1.13727	0.00126271
LIN7A	1.13552	0.00348972
TMCC3	1.13481	0.0115766
SMTNL1	1.13446	0.00876892
SMCO4	1.13443	0.0234353
PCDHGB4	1.13416	0.0291511
CGN	1.13088	0.00318691
MFSD7	1.12924	0.0185449
SPATA2L	1.12873	0.000907856
MFSD2A	1.12771	0.00157328
AKAP12	1.12648	0.000522123
CACNA1I	1.12531	0.0167385
GPR180	1.1223	0.000965313
FLNA	1.12222	5.21194e-05
ARHGAP18	1.12217	0.00774205
PPM1E	1.12176	0.00105875
FAM208B	1.12095	0.000522123
MIR4292	1.12043	0.0230372
IRAK2	1.11937	0.0125656
FEM1C	1.11692	0.000490862
HIPK3	1.11674	0.00156075
NAV1	1.11557	0.000613606
EEA1	1.11382	0.00084929
S100A11	1.11228	0.00223086
KCNN4	1.11144	0.0180664
RAB20	1.11052	0.0259441
ITGA6	1.1104	0.0318754
CCDC65	1.10863	0.0212135
LIMS1	1.1085	0.000722241
FAM129A	1.10845	0.0162515
OXCT2	1.10802	0.0127232
PPP1R3B	1.10537	0.00422001
ARHGAP31	1.10394	0.000637434
MYO5B	1.10368	0.00397107
MTHFD1L	1.10358	0.000688583
MYO1E	1.10182	0.000917251
NRF1	1.10003	0.00196831
PRIMA1	1.09931	0.0369742
ANKHD1	1.09844	0.0114522
ICAM5	1.09841	0.0039705
DLK2	1.09784	0.00154057
KRR1	1.09622	0.000645696
RAB39A	1.08996	0.00219634
RP11-23P13.7	1.08988	0.004003
TUBA8	1.08827	0.00978743
ZNF483	1.08827	0.00657185
MAPRE2	1.08729	0.001161
VWA5B2	1.08562	0.0313461
EOGT	1.08476	0.0149815
RP11-338I21.1	1.08424	0.0480855
PALLD	1.08217	0.0342366
GAREM	1.08199	0.0017864
AC092835.2	1.08138	0.00810121
ANXA2	1.08091	0.000373815
KCTD9	1.08084	0.00127462
PCNXL2	1.08	0.00156772
ARHGAP32	1.07941	0.00141751
NPR2	1.07927	0.000929712
UHMK1	1.07869	0.000344847
ACTA2	1.07796	0.0111548
RP11-158M2.4	1.07733	0.0125134
FREM2	1.07643	0.000363931
PER2	1.07625	0.0014516
SHC1	1.07597	0.000613606
GAD1	1.07538	0.00179458
FAS	1.07308	0.0341571
PCDHGC3	1.07191	9.13306e-05
COL14A1	1.07122	0.0284355
RP11-235E17.6	1.0704	0.0304891
RP11-23P13.6	1.0698	0.0142063
EVC	1.06973	0.00076279
CD97	1.06962	0.000573472
DDHD1	1.06897	0.00832682
PTP4A3	1.06706	0.00104477
ISPD	1.06664	0.0172958
AK4	1.066	0.000525921
ZNF600	1.06527	0.0411368
CTD-2574D22.4	1.06476	0.0165883
RP11-766F14.2	1.06458	0.0023014
FAM49A	1.0637	2.18497e-05
TTC39B	1.06262	0.00315323
FBLIM1	1.06176	0.000965313
SLC30A1	1.06143	0.00138079
GRIK4	1.06141	0.00337769
TMEM249	1.0605	0.0274524
OSBPL3	1.06036	0.00075224
NPTX1	1.05976	0.0138157
COL1A1	1.05841	0.0148928
VAC14-AS1	1.05814	0.0275914
SLC4A7	1.05442	0.000586572
BDP1	1.05382	0.000816214
GAL	1.05166	0.0297864
GFPT2	1.05058	0.00202617
AC007566.10	1.04858	0.0198962
PRKAR1B	1.04685	0.000345972
STEAP3	1.04111	0.00240369
N4BP3	1.0411	0.0115598
PDE8B	1.03916	0.012462
POMK	1.03881	0.00359368
VRK2	1.03862	0.02842
BIRC6	1.03797	0.000288019
RP11-711M9.1	1.03728	0.042382
PMM2	1.0371	0.00121732
PREX1	1.03633	0.00120965
FAM184B	1.03533	0.0167099
LAMC1	1.03419	0.000169631
C1orf132	1.03345	0.0165674
KIAA1522	1.03276	0.00265599
STK17A	1.03143	0.00285451
RCOR1	1.03083	0.000335755
LL0XNC01-7P3.1	1.03047	0.0266291
MAN1C1	1.03002	0.000292854
CTD-2135D7.2	1.02967	0.0188307
TPM4	1.02893	0.0387581
ANKRD42	1.02875	0.028685
FNDC3B	1.02853	0.000800896
SH3RF1	1.02759	0.000816214
MEF2C	1.0274	0.0135033
CSGALNACT1	1.02709	0.0200559
DIRAS2	1.02474	0.001161
ERN1	1.02465	0.0018019
GBP1	1.02385	0.000236204
TEAD1	1.02256	0.000613606
ANKRD33B	1.02226	0.00343196
RP11-12J10.3	1.02153	0.0210398
ANK2	1.01966	0.00846715
LPL	1.01962	0.0025437
KMT2A	1.01879	0.000586572
PLEKHG2	1.01748	0.00281503
SLC7A1	1.01662	0.000164037
TNR	1.01557	0.00183035
CDHR2	1.01463	0.00469025
OCIAD2	1.01447	0.000922389
NCEH1	1.01355	0.00735808
CYP4F11	1.01314	0.0166449
NRCAM	1.01235	0.000473767
EHD4	1.01143	0.000364746
CCDC113	1.00995	0.0130602
ACTBP11	1.00939	0.0164131
ADAMTS4	1.00862	0.000289937
LATS2	1.00814	0.00209433
CSDC2	1.00812	0.00975009
CELSR1	1.00685	0.0110443
LINC00963	1.00462	0.010212
PDP1	1.00431	0.000485208
ZNF597	1.00423	0.0434129
FAM19A5	1.00405	0.000306286
TIMP3	1.00307	0.0257542
ROCK2	1.00174	0.000282388
NPAS2	0.998821	0.000920812
SSC5D	0.998117	0.00746155
AEN	0.997666	0.00359142
DPF3	0.997402	0.0032427
EGR2	0.997383	0.00163894
ATP6V0A1	0.996586	0.00278125
RPS11P5	0.994777	0.042788
ALG10B	0.994658	0.025184
RP11-108K14.4	0.994336	0.00529587
EMP3	0.994098	0.00289889
ICOSLG	0.993744	0.00205909
STK4	0.993555	0.00219579
ACTR3	0.992813	0.00078189
RP11-452F19.3	0.992629	0.0413253
PFKP	0.992222	0.000263368
GNG7	0.991965	0.000699504
SLC7A11	0.99189	0.00117989
LGALS3	0.991265	0.00199874
SOX7	0.990119	0.0104556
RP4-607J23.2	0.988375	0.0141619
IRS1	0.988028	0.0010056
MAP1B	0.986869	0.000134485
CHPF2	0.986127	0.00137366
FBN2	0.98506	0.00108304
ZFHX3	0.984845	0.0031687
TTLL11	0.984699	0.0164131
CPNE5	0.983158	0.00402353
PEG10	0.981451	0.000109216
CNNM1	0.979232	0.0150617
FREM1	0.9784	0.0249507
GCH1	0.977972	0.00280051
RP4-639F20.1	0.977696	0.0121835
ARAP3	0.976581	0.000518643
FAM181A	0.975671	0.0175085
CHD9	0.974762	0.00169939
IL32	0.974048	0.014522
EPS8L2	0.973864	0.00697686
TDG	0.973343	0.0407181
NEK3	0.973108	0.0387531
ITGB1BP2	0.971939	0.0187584
FZD6	0.971562	0.00245755
CARS	0.970993	0.000586572
CLRN1	0.969824	0.00265653
BLZF1	0.969791	0.00459858
PSMD12	0.96709	0.00156772
E2F7	0.966684	0.00474408
TRAF6	0.966081	0.00315323
OXCT2P1	0.965842	0.0311872
GNG12	0.965127	0.000674169
COBL	0.962206	0.00286835
GBP2	0.959143	0.0011524
JPH3	0.958855	0.0171063
NKAIN3	0.957228	0.0257542
FAM46A	0.956393	0.000815851
AKR7A3	0.956393	0.0115201
PDLIM7	0.95477	0.00129674
JUN	0.95356	0.000236204
CACNB4	0.953276	0.00870801
EEPD1	0.952428	0.00354384
PRX	0.952082	0.0214687
MYOF	0.951568	0.00773094
PTCHD1	0.951367	0.000746019
WWC2	0.951012	0.0363354
RPL23AP4	0.950212	0.0495377
KLHL29	0.950078	0.00340584
WDFY2	0.949353	0.00260376
KCNH4	0.948331	0.00372164
RP11-500C11.3	0.948025	0.00201129
RPAP3	0.947161	0.00216622
PCNX	0.94697	0.00145666
CDC42	0.946772	0.000527408
AP1S1	0.946541	0.00082202
C8orf58	0.945722	0.0111752
KPNA1	0.945513	0.000573389
LINC00189	0.945485	0.0212135
CLMP	0.945346	0.0213201
GDNF	0.945295	0.025958
DNAH1	0.944762	0.00290921
PXN	0.944723	0.000645696
MYRF	0.943257	0.00167872
LL0XNC01-237H1.2	0.942627	0.0228325
AC003006.7	0.940615	0.0263075
RPS6KB1	0.939691	0.0396262
ARF6	0.939241	0.000573389
CAPN2	0.939171	0.000358738
EP400NL	0.938128	0.00305255
RHBDL1	0.936233	0.00665755
TNFRSF8	0.93542	0.0358249
APOL6	0.934337	0.000208079
LHFPL2	0.934036	0.0082307
AGPAT9	0.933969	0.0475049
TRIM9	0.933332	0.000308727
ADAM9	0.932272	0.0145647
UBE2QL1	0.931945	0.0406086
SYNM	0.931108	0.00135693
ENTPD7	0.930878	0.00232671
TRIM44	0.930526	0.0025824
FAT1	0.93	0.00404638
IPPK	0.929505	0.0053941
CTC-479C5.12	0.929294	0.0226487
ZBP1	0.929194	0.00156518
EML4	0.929081	0.00832967
NAA15	0.928628	0.00161307
CSPG4P11	0.928239	0.0434094
ITPRIPL2	0.927549	0.00132575
NACC2	0.926258	0.00036742
DNAJB1	0.925206	0.000731276
MYO5A	0.923589	0.00110004
UNC13A	0.92269	0.00082202
TTC13	0.922114	0.0218884
ULBP3	0.919326	0.0256792
ZC3HAV1	0.917157	0.000590261
TIMP1	0.917099	0.00173118
GBE1	0.916384	0.0017864
IFNGR2	0.916026	0.000758835
EGLN3	0.915501	0.00805493
RP11-517B11.7	0.911171	0.0342366
C10orf12	0.91077	0.00520443
ZNF800	0.910537	0.00196842
MYD88	0.910475	0.000582065
ZNF460	0.909224	0.00442901
PSTPIP2	0.908644	0.00330941
ZNF382	0.908579	0.0114021
ZNF221	0.908427	0.00528131
CDC42EP1	0.908274	0.0029032
HCN2	0.906881	0.0209802
KIAA0947	0.904387	0.000363931
ENDOD1	0.903824	0.00147255
MUC20	0.903369	0.0218838
CTD-2561J22.2	0.903099	0.0218838
NES	0.90309	8.89335e-05
MTX3	0.902463	0.00184742
FGF2	0.901951	0.00216622
UBR3	0.901945	0.00131195
MED29	0.901065	0.0314383
ATXN7	0.900898	0.0155519
RP11-395G23.3	0.900194	0.00353574
RP3-428L16.2	0.898716	0.000731276
LINC00641	0.896812	0.00606329
ARHGAP26	0.896125	0.0366321
SOCS4	0.895583	0.00152689
OPN1SW	0.894165	0.0143128
LRRK1	0.892422	0.0113582
NUTM2D	0.891648	0.0223816
ENO2	0.890722	0.0042389
KMT2D	0.89069	0.000227991
COL26A1	0.890476	0.0332163
KLHL42	0.889713	0.00130388
RP11-342M1.3	0.889446	0.0416632
FAM84B	0.88783	0.000827015
FGF1	0.887118	0.0107429
TNFRSF1A	0.886993	0.00516402
LRRC4	0.886059	0.00267166
HIF1A	0.885917	0.000359035
ZNF805	0.884202	0.00692319
MYL12A	0.883159	0.00312081
MYLK	0.883067	0.00777087
AL020996.1	0.882908	0.0169151
LNX1	0.881914	0.0319477
CTD-2622I13.3	0.881854	0.0266641
PPME1	0.881481	0.00169406
JAK2	0.87903	0.00702121
AHCTF1	0.878405	0.00305828
BNC2	0.878377	0.0366321
ATP10A	0.878103	0.000800896
LARP1B	0.877316	0.00343196
TSPAN17	0.876908	0.0109643
RP1-59D14.5	0.8759	0.0301823
SHANK2	0.875274	0.0046475
ATP2B1	0.875262	0.000362166
OTUD4	0.87515	0.000610469
TMEM189	0.874835	0.00285451
N4BP1	0.874572	0.000917249
TACC2	0.873018	0.00182726
RP11-37B2.1	0.872517	0.0361425
MAML2	0.871122	0.00085235
LPHN2	0.870968	0.0340394
RP11-286N22.8	0.87052	0.0223792
SOX15	0.870273	0.0112498
PRKXP1	0.869795	0.0343468
KBTBD8	0.869224	0.0152236
DMTN	0.868074	0.000919601
BTAF1	0.867963	0.000518643
DDX21	0.867817	0.000283562
PHLDB1	0.867154	0.000586572
AKAP2	0.866908	0.00347096
TNFSF13B	0.866699	0.0458629
PLEKHH2	0.866077	0.0137732
RP11-1277A3.1	0.864835	0.011591
FKBP11	0.862138	0.00510125
ABCA11P	0.861741	0.0142257
CPEB4	0.860981	0.0127449
NBEAL1	0.859769	0.012762
SLFNL1	0.859225	0.0183847
PCDH9	0.858954	0.00134677
BSN	0.858763	0.00084857
AP3S2	0.858749	0.00472857
ZSCAN5A	0.857751	0.0242865
FERMT2	0.856498	0.004719
TNFRSF10B	0.856273	0.000693591
PSME4	0.856209	0.00548348
MAP3K14	0.856053	0.00753352
BICC1	0.856028	0.00570442
LSM10	0.854186	0.0130913
ACO1	0.853499	0.00348972
PDE2A	0.853101	0.00562762
MIR503HG	0.852602	0.0366985
GLIS3	0.851615	0.00224502
ADAM19	0.849601	0.000688583
UBE3C	0.849134	0.000688583
C12orf5	0.849019	0.00252684
CDC42EP2	0.848377	0.0277064
TSPAN9	0.847594	0.00162682
DGKZ	0.847128	0.00154057
A2M	0.84605	0.000390564
SEC24D	0.846025	0.00268057
MAOB	0.844037	0.000417944
PPARGC1B	0.843894	0.00686997
MFSD6	0.843665	0.00455489
CHMP2B	0.843088	0.0138112
MGRN1	0.843013	0.00379049
GPR62	0.842952	0.00396771
SLC4A11	0.842857	0.0103081
ANKRD18EP	0.841903	0.0332881
RP5-1142A6.9	0.841648	0.0263783
TEAD3	0.841318	0.00471533
CLIP1	0.841012	0.0011688
MREG	0.840919	0.0082307
TSPY26P	0.840864	0.0180965
RP11-867G23.8	0.840094	0.0192245
EIF5A2	0.839252	0.0150236
HIVEP2	0.838903	0.0119173
EP300	0.837729	0.000405686
EFHC1	0.837568	0.00289484
HSD17B12	0.837401	0.00170355
SIPA1L1	0.836388	0.000515557
DHCR24	0.836041	0.000288019
GPR75	0.835932	0.0434094
AC027612.6	0.835022	0.00455489
FNTB	0.834481	0.00923625
ELK4	0.833229	0.00314709
NUFIP2	0.8323	0.000434178
TANC2	0.832243	0.00132669
PRUNE2	0.831914	0.00850424
TRAM2	0.831308	0.000427683
FAM135A	0.831153	0.00244942
PRRC2C	0.830876	0.000346971
DAGLA	0.828486	0.00121079
PIM2	0.828363	0.0016765
SRRM5	0.827341	0.0488601
ABL2	0.827107	0.000518643
LCA5	0.826973	0.00509568
ZNF26	0.826703	0.00778557
RALGAPB	0.826547	0.00273059
FAM84A	0.825469	0.00476937
SAMD9L	0.825288	0.0033089
AGAP2	0.824904	0.0152854
C18orf25	0.822718	0.00189894
CNN3	0.822575	0.000579149
CCDC144CP	0.822397	0.0402756
GCLM	0.822286	0.00281503
FCRLA	0.822265	0.0143219
ARSJ	0.821996	0.00178501
ZNF699	0.821824	0.0141807
ACSBG1	0.821163	0.00882511
U47924.30	0.821088	0.0254668
SYBU	0.820708	0.0206281
ZNF625	0.82015	0.0137118
ETS2	0.819633	0.00282232
CBL	0.818309	0.00109241
HIPK2	0.81817	0.000205951
ZNF530	0.817759	0.0286055
CTD-2350C19.1	0.817215	0.0174321
ERVK13-1	0.816221	0.0293708
EGFEM1P	0.815827	0.0380626
HCFC2	0.814634	0.0043592
DLST	0.814624	0.000702156
WDR43	0.814005	0.000996969
MAP6D1	0.813806	0.00459632
COL6A1	0.813365	0.000139284
TFRC	0.812936	0.0349795
PHTF2	0.812106	0.00236315
COL4A1	0.812057	0.000273453
MRAP2	0.811743	0.0193257
FRYL	0.811314	0.00252684
GEM	0.811002	0.00928252
SHB	0.810937	0.000918098
DHCR7	0.810465	0.0153596
FAM131A	0.809454	0.00309845
RELT	0.807257	0.00120025
ABCD1	0.807137	0.00104208
HSPA4L	0.806911	0.00118413
CD99P1	0.806122	0.0494297
RP11-20I23.8	0.806016	0.0031687
FARP2	0.805451	0.00130078
ARL13B	0.805345	0.0455093
LRRC73	0.805145	0.0209802
NAA25	0.805084	0.00143847
DUSP9	0.804437	0.014085
ARID5B	0.803096	0.00102125
RP11-395P17.3	0.803008	0.0106924
CYFIP2	0.802334	0.00340674
TWF1P1	0.801239	0.0427776
SEC24A	0.800827	0.00264528
LIMK1	0.800176	0.0121665

## Sheet: logFC<=-0.8
Gene_Symbol	log_Fold_Change	FDR
RP11-248G5.8	-10.9551	0.00364749
RP1-27O5.3	-10.2869	0.00210802
ZNF8	-9.53608	0.0239332
AC040173.1	-7.30356	0.00135421
TNFRSF6B	-6.64345	0.00215021
AC010335.1	-5.17697	0.00100302
PTGES3L-AARSD1	-4.81008	0.00829305
ATOH8	-4.42411	0.00193247
BMF	-4.07582	0.000117416
CTD-3199J23.4	-3.85474	0.0307549
RASD2	-3.72624	0.000573389
KLF15	-3.4209	0.000390564
RP11-311C24.1	-3.37628	0.0125298
BMPER	-3.32754	0.00117649
ZNF788	-3.30394	0.000586572
C15orf38-AP3S2	-3.26494	0.000985727
RP11-340F14.5	-3.08845	0.00956066
GPR179	-3.03852	0.0243545
CBX7	-2.97949	0.00201779
HRH3	-2.95906	0.00191884
AC104698.1	-2.93196	0.00578745
GATA2	-2.88049	0.0027262
SIX2	-2.80461	0.00167051
RP1-302G2.5	-2.74936	0.00779531
HELT	-2.72015	0.0101555
DHRS3	-2.65425	0.00302184
HES5	-2.63606	0.000137303
FBXO32	-2.56362	0.00035098
RFTN2	-2.52244	0.000274898
EXTL3	-2.50365	0.000177195
SDAD1P1	-2.48143	0.0073931
MYCL	-2.4793	0.000136998
ZNF33B	-2.47205	0.0183117
LRRN1	-2.46187	0.00133315
RP11-398C13.6	-2.40328	0.00479902
CLDN5	-2.39763	0.000395778
TOB1-AS1	-2.39658	0.00471533
USP2	-2.37558	0.000758693
PCDH8	-2.37344	0.000531025
AC139100.2	-2.35754	0.00327052
YPEL1	-2.33324	0.000344847
HIST1H2BD	-2.32642	0.00495279
ANKDD1B	-2.32255	0.0123768
DUSP10	-2.28022	0.00158515
VEPH1	-2.26492	0.00945905
RPL32P29	-2.26265	0.00415801
AC114730.3	-2.2614	0.00317467
GLYCTK-AS1	-2.23938	0.00838398
RP11-690G19.3	-2.2348	0.00141956
CD247	-2.21906	0.00427241
CABP7	-2.14628	0.000916573
OSER1-AS1	-2.11907	0.00934851
AC005609.1	-2.11661	0.011873
ABCD2	-2.10446	0.00411673
RP11-120J1.1	-2.08511	0.00353936
TMEM187	-2.06681	0.00195342
MEF2BNB-MEF2B	-2.06569	0.0277874
RP11-1055B8.4	-2.04561	0.00144312
CSPG4P10	-2.0456	0.0188835
SOX8	-2.03362	0.000117416
HIST1H2AC	-2.03235	0.00396769
HIST2H4B	-2.01729	0.00209525
HRK	-2.01674	0.00110004
DLL1	-2.01354	0.000142761
TGFB2	-1.98009	0.000497844
PLCH1	-1.97547	0.000736613
CCDC121	-1.96432	0.0213134
DCP2	-1.94964	0.000283562
PTPN3	-1.94713	0.0043513
RP11-373L24.1	-1.94519	0.00455489
SLC2A4	-1.94004	0.00213112
RP11-255C15.4	-1.93262	0.0189387
HHIPL1	-1.92735	0.00873487
H1FX-AS1	-1.92177	0.00158016
KLHL32	-1.9167	0.0462934
KLHL24	-1.91517	0.000452914
PIK3IP1	-1.90736	0.00981724
WNT7A	-1.89963	0.000745653
EDNRB	-1.89939	0.00294244
ZNF546	-1.88741	0.0101555
PIGV	-1.87646	0.00219218
AC073283.4	-1.87293	0.00581125
HES7	-1.85589	0.00337071
POU2F1	-1.85234	0.00133315
VASN	-1.85146	0.000674169
CCDC177	-1.8463	0.000828644
CCDC151	-1.8386	0.00344586
RP11-46C24.7	-1.83806	0.010103
KLHDC9	-1.82894	0.00728556
FRAT1	-1.82117	0.000712523
HIST2H3A	-1.80938	0.00335363
DBP	-1.8081	0.000703933
HIST2H4A	-1.80415	0.00425769
FAM110B	-1.80119	0.0244473
MCF2L-AS1	-1.79709	0.0186199
P2RX7	-1.79495	0.00620824
RP3-395M20.12	-1.79128	0.000635654
YPEL3	-1.79006	0.000436601
RASD1	-1.78211	0.00369114
MYOG	-1.77959	0.00183586
FGD3	-1.77784	0.00348972
OLIG1	-1.7742	0.0027849
UPRT	-1.77093	0.0067676
FOXA3	-1.76592	0.0178043
GADD45G	-1.75723	0.000148845
METTL7A	-1.74956	0.00132575
OPRL1	-1.74668	0.00348232
C7orf61	-1.73247	0.00295118
IRX6	-1.71689	0.00618417
C17orf103	-1.71464	0.00135096
HIST3H2A	-1.71061	0.00209525
PKNOX2	-1.70879	0.00963683
RSG1	-1.70855	0.00140829
MN1	-1.70824	0.000344847
RP11-412D9.4	-1.70758	0.0202842
FAXDC2	-1.70662	0.00297773
AC074212.5	-1.7061	0.00111002
RP11-258C19.7	-1.70061	0.00442549
SH3BP5L	-1.69955	0.000146336
HIST2H3C	-1.69376	0.0055285
ADCK3	-1.69163	0.000233674
RDM1	-1.68595	0.026782
RP1-193H18.2	-1.68351	0.00277621
MIEF2	-1.67491	0.0305603
ZNF688	-1.67216	0.0159646
IGDCC3	-1.6688	0.000460916
RP11-120K24.3	-1.65866	0.0340394
EPOR	-1.65327	0.0148818
APCDD1	-1.65305	0.00162682
PGM5	-1.63534	0.000497412
GBGT1	-1.63397	0.015927
CNNM2	-1.62797	0.00469025
KCNN2	-1.62758	0.00623604
HOGA1	-1.62755	0.00919314
AKNAD1	-1.62551	0.00127462
AP000473.8	-1.6223	0.00637661
NEURL2	-1.6181	0.0120228
FOXO4	-1.61552	0.00337071
RP11-196G18.22	-1.606	0.00137813
STON1	-1.6052	0.00106188
LINC00886	-1.60352	0.025047
BBOX1	-1.60284	0.0135033
LMO1	-1.60181	0.00245037
SAMD13	-1.59797	0.0105901
PBX3	-1.59568	0.00103285
HSD11B2	-1.59507	0.00314812
ADCYAP1R1	-1.59129	0.000216511
TTPA	-1.58528	0.00617246
TMEM86A	-1.58302	0.0104192
CACNA1G	-1.58298	0.00771628
AC074212.6	-1.57269	0.00291574
PIK3C2B	-1.57162	0.000146336
AP000473.5	-1.568	0.0230005
ORAOV1	-1.56527	0.000927138
SCRT2	-1.56177	0.0046382
ZDHHC12	-1.56122	0.00291574
TFAP2A-AS1	-1.5604	0.0137576
FAM69C	-1.55662	0.00316618
RP11-545I5.3	-1.55337	0.012237
CDKN1C	-1.55248	0.000590261
USP6	-1.54847	0.0288624
OSR2	-1.54148	0.0122307
BOLA1	-1.53711	0.0354324
RP11-486G15.2	-1.53646	0.00626257
LGR5	-1.52319	0.000376334
RP3-522D1.1	-1.52294	0.0104196
TBC1D5	-1.52184	0.000688583
FOXJ1	-1.51525	0.00200088
PLIN5	-1.51487	0.00289889
AC018755.16	-1.50945	0.00760522
HBP1	-1.50945	0.000479935
MTSS1	-1.50751	0.0036612
LFNG	-1.50659	0.000637434
AC002398.9	-1.50584	0.0337114
HAS3	-1.50246	0.00295595
USP2-AS1	-1.49611	0.0262675
HIST1H2AG	-1.49283	0.00832374
ID2	-1.48452	0.00270718
KCNK3	-1.4794	0.000573389
OMG	-1.47839	0.00365811
KB-1460A1.5	-1.47097	0.0114256
FOXO6	-1.46189	0.000142427
OLIG2	-1.46106	0.0135924
JAKMIP2	-1.46001	0.00106275
RP11-644F5.11	-1.45346	0.00675118
RP11-999E24.3	-1.4457	0.0123611
RP11-161M6.2	-1.43984	0.0252312
RP11-708J19.1	-1.4385	0.00673815
ZDHHC22	-1.43683	0.00635845
MXI1	-1.4361	0.0014152
FIBIN	-1.43602	0.00218792
AC018730.1	-1.43368	0.00339824
SIX5	-1.43153	0.000292854
ING4	-1.43123	0.000930335
EPS8L1	-1.42926	0.00385373
FOXO3	-1.42707	0.0164367
RP4-798P15.3	-1.42608	0.0442338
YTHDF3	-1.42205	0.0047497
ANKRD65	-1.42023	0.012237
JMY	-1.42017	0.000571
MLLT4-AS1	-1.41891	0.00301962
SLC29A3	-1.41657	0.00970157
AP001258.4	-1.41017	0.0199989
RP5-1065J22.8	-1.40604	0.00507841
ANGPTL6	-1.40588	0.0119315
RP11-504P24.8	-1.40483	0.0079966
NR2F1	-1.40393	0.000139284
Z97634.3	-1.40324	0.019387
NEDD4L	-1.39804	0.00544177
AKAP3	-1.39453	0.0446604
RP11-849F2.8	-1.3924	0.00895262
APC2	-1.38991	0.0440699
RAB3C	-1.38983	0.00805898
SNCAIP	-1.38154	0.0139292
BRWD1-IT2	-1.38112	0.0183763
SLC25A42	-1.37681	0.0043513
PMF1-BGLAP	-1.37669	0.00269386
ABTB1	-1.37638	0.00702121
FRAT2	-1.37548	0.000828644
CDKN2C	-1.37344	0.000142761
RP11-611D20.2	-1.36747	0.0092711
SIX3	-1.36665	0.048619
CLEC4F	-1.3626	0.0245703
RCOR2	-1.36166	0.000178009
MDFI	-1.36062	0.00165892
CDC25C	-1.36017	0.00446396
KLHL35	-1.35961	0.016262
CBFA2T2	-1.35508	0.000991311
TCP11L2	-1.35023	0.00531799
RP11-57A19.2	-1.3501	0.010073
RP11-61J19.4	-1.35001	0.0101972
PLK1S1	-1.34799	0.0102981
TMEM33	-1.34723	0.00066431
RP13-516M14.1	-1.34634	0.0291964
BCL2L11	-1.34237	0.000586572
GRASP	-1.33774	0.00889996
GEMIN8	-1.33516	0.00104354
PPFIBP2	-1.3351	0.00959813
MNT	-1.33281	0.000335755
MIMT1	-1.33214	0.038419
EMX2	-1.33122	0.0123355
LINC00634	-1.32898	0.0340953
ZNF33B	-1.32651	0.00951616
FZD2	-1.32456	0.00047555
FBXL20	-1.32256	0.00134852
FAM213B	-1.31996	0.0452101
KCNIP3	-1.31852	0.00767511
VPS37D	-1.31852	0.00159096
RASSF4	-1.31679	0.0101022
MEGF10	-1.31677	0.00130211
OPHN1	-1.31643	0.000922389
EBF3	-1.31606	0.00128739
CCDC28A	-1.31547	0.00309606
C16orf86	-1.31369	0.0043513
AC018755.1	-1.31106	0.0100801
PIF1	-1.31067	0.000983923
hsa-mir-8072	-1.30309	0.00828114
ELF3	-1.30174	0.00213044
PRODH	-1.2975	0.00902856
SFRP2	-1.29643	0.000590261
MXD3	-1.28881	0.00218299
AC004540.4	-1.28808	0.00805898
TAPT1-AS1	-1.28616	0.0142245
FAM63A	-1.2844	0.00434689
ZRANB3	-1.28176	0.00173267
ST6GALNAC2	-1.28085	0.0130028
CLCN7	-1.27778	0.000142761
DAZAP2	-1.27396	0.000917251
SPSB3	-1.27349	0.00162682
C14orf93	-1.27279	0.001445
RP11-436K8.1	-1.27165	0.0475644
GPCPD1	-1.27132	0.00208205
RP11-552F3.12	-1.26985	0.0209989
ELAVL4	-1.26662	0.00218792
MAP2K5	-1.26612	0.00201258
CTC-467M3.3	-1.26572	0.0266284
GPR88	-1.26429	0.000674364
ST6GAL1	-1.26364	0.00144301
CAMSAP3	-1.26205	0.00310701
CD5	-1.26087	0.0250732
ANXA9	-1.25747	0.0120592
BTN3A3	-1.25729	0.0104909
ABLIM2	-1.25657	0.00711112
THRA	-1.25562	0.000358894
CDC42SE2	-1.25503	0.000742012
MRPL49	-1.24412	0.00721082
AC135048.13	-1.24343	0.0154244
MST1L	-1.24182	0.00778476
DGAT2	-1.24053	0.00775151
VSTM4	-1.23794	0.00202045
MFNG	-1.23696	0.0117693
RP5-991G20.4	-1.22999	0.0081733
ATP6AP1L	-1.22759	0.0045672
KANK4	-1.22541	0.0158554
AC140481.1	-1.22486	0.00878532
ZCWPW1	-1.22459	0.011197
HSD17B6	-1.22399	0.0115766
RP3-326L13.3	-1.22393	0.00216622
KBTBD7	-1.22337	0.00156619
RP5-1092A3.4	-1.22246	0.00703308
RAB3IL1	-1.22205	0.0105589
KIF20A	-1.21921	0.00435478
RAB33A	-1.21805	0.0012767
MLLT3	-1.21791	0.00159461
PCMTD1	-1.21768	0.00162682
CTD-2287O16.5	-1.21627	0.0427443
EPB41L4A-AS1	-1.21478	0.00628904
NMNAT3	-1.21433	0.0401515
PRRT2	-1.21112	0.012481
SLC2A12	-1.21022	0.00453788
SEMA6C	-1.20559	0.00127612
RP11-16N11.2	-1.20497	0.0234004
ST18	-1.20412	0.0208244
DUSP26	-1.20059	0.00311683
RP11-872J21.3	-1.19901	0.0303161
DNAJC12	-1.19575	0.00232236
ARVCF	-1.19446	0.000288019
TLE3	-1.19259	0.00593681
HILS1	-1.19163	0.00973839
RP5-1068E13.7	-1.19146	0.0452336
AF127936.7	-1.19141	0.00956066
PNMAL2	-1.19076	0.0062348
ZBTB18	-1.19047	0.000264021
CREB3L4	-1.18915	0.00124166
TSC22D3	-1.18753	0.00322675
RP11-206L10.9	-1.18723	0.027989
RP11-356J5.12	-1.18703	0.0146268
C1orf95	-1.1855	0.00274069
CABLES1	-1.18527	0.00218792
NR1D2	-1.185	0.00213697
DGCR6	-1.18493	0.0427303
ERBB2	-1.18395	0.00550573
CSPG4P9	-1.1832	0.00417054
BDH1	-1.1815	0.0297864
OTX2	-1.18025	0.0108512
INSM2	-1.17868	0.00789634
RTN4RL1	-1.17641	0.0145444
TMEM108	-1.17596	0.00153584
HIST2H2BE	-1.17464	0.00581587
PPM1H	-1.1739	0.00121607
NADK2	-1.17307	0.00309192
GKAP1	-1.17277	0.0105787
ZNF239	-1.16896	0.0108533
CTD-2349P21.9	-1.1683	0.0233054
MANBA	-1.16798	0.00211483
PAX6	-1.1676	0.00194481
ZNF396	-1.16695	0.0333833
FAM69A	-1.16606	0.00217319
MPRIPP1	-1.16529	0.0234104
RP11-15H20.5	-1.16466	0.00211483
C6orf3	-1.16339	0.0165609
DCT	-1.16241	0.0140493
HS1BP3	-1.16101	0.0016872
ZSCAN2	-1.16055	0.0107981
RNF146	-1.1576	0.0346369
LRRTM3	-1.1538	0.0300523
AC007292.6	-1.15229	0.0134192
CTB-175P5.4	-1.15215	0.00291574
RGR	-1.15048	0.00143873
PDZRN3	-1.14898	0.000429713
BTN3A2	-1.1469	0.000516839
DHRS13	-1.1457	0.000929712
FAM117A	-1.14327	0.0021594
CAHM	-1.14144	0.0142011
RNF122	-1.1389	0.00291574
RP11-98D18.9	-1.13817	0.0101868
SEC22A	-1.13812	0.00202617
THAP8	-1.13741	0.00157345
RP11-1299A16.3	-1.13603	0.015064
TMCC1-AS1	-1.13185	0.0209208
OMA1	-1.13158	0.00685208
FAM173B	-1.13088	0.0271889
AC096772.6	-1.13018	0.0130554
TFAP4	-1.12993	0.0136711
FER	-1.12984	0.013464
TLE6	-1.12845	0.00576058
AC009501.4	-1.12775	0.000917832
BEX4	-1.1271	0.021078
AC016747.3	-1.12571	0.0103671
KCNJ9	-1.12427	0.0350476
CTD-2186M15.3	-1.12229	0.0192608
WIPI1	-1.12063	0.00785541
TEKT2	-1.12035	0.0104556
RNASEK-C17orf49	-1.11999	0.0223337
RP1-266L20.2	-1.11961	0.00882866
RP11-196G18.23	-1.11857	0.012762
TBX6	-1.11754	0.0155283
RFX4	-1.11747	0.000508154
NOVA2	-1.11711	0.000413861
CTAGE5	-1.11543	0.00218792
PTCH1	-1.11383	0.00771628
ZBTB12	-1.11314	0.00319677
RP11-111F5.4	-1.11306	0.00510125
HIST2H2BC	-1.11235	0.0482981
AC142528.1	-1.11119	0.0164131
C1QTNF5	-1.11101	0.0029924
ZNF775	-1.10948	0.00111414
MIR3648	-1.10826	0.000364746
RNF112	-1.10747	0.00309409
LINC00174	-1.1074	0.00686368
LMTK3	-1.10699	0.0101214
KIF19	-1.10615	0.0370633
KMT2E-AS1	-1.10467	0.0104148
CA14	-1.10431	0.000795447
PLA2G6	-1.10428	0.0242793
BTN3A1	-1.09834	0.0266356
CLCN4	-1.0977	0.00404193
ANKRD12	-1.09545	0.00101897
CITF22-92A6.1	-1.09464	0.0362796
ID3	-1.09234	0.00267166
TLL2	-1.09072	0.0227612
RP11-488C13.5	-1.09017	0.00626725
LINC00896	-1.08913	0.00898587
RP11-572O17.1	-1.08682	0.0404983
RP11-600F24.7	-1.08651	0.0115512
CDON	-1.08258	0.000582065
SYT3	-1.07905	0.0287246
SCHIP1	-1.07873	0.00144359
KCNJ10	-1.07842	0.000989028
RP11-793H13.10	-1.07815	0.0332881
CTC-359D24.3	-1.07642	0.0183847
BMS1P10	-1.07614	0.0470809
PSMB9	-1.07601	0.032297
SPHK2	-1.07569	0.00113613
CEBPA-AS1	-1.07329	0.0107263
LRRC17	-1.07295	0.00244899
HTRA3	-1.07278	0.038068
NCALD	-1.07264	0.00310701
CBX4	-1.07178	0.000521063
LRRC27	-1.07076	0.00213369
FANCE	-1.0698	0.00307292
CTB-31O20.2	-1.0694	0.00539212
UAP1L1	-1.06833	0.000712523
N4BP2L1	-1.06804	0.00293572
KLF2	-1.06777	0.00521567
CRB1	-1.06738	0.00348773
RXRB	-1.0668	0.0318213
GRAMD3	-1.06613	0.0280762
AC004840.9	-1.06494	0.010545
PBK	-1.06454	0.00352305
NR4A2	-1.06444	0.0480229
PTGES	-1.06221	0.0360707
IGSF9	-1.06118	0.000518643
FAM134A	-1.05991	0.00385228
SHF	-1.05927	0.00518778
ANKRD24	-1.05782	0.0090124
GLCCI1	-1.05682	0.000251465
RP11-512H23.2	-1.0555	0.0356604
NBR1	-1.05355	0.000661138
RXRG	-1.05342	0.0249628
ARID3A	-1.05314	0.0262569
RMI2	-1.0528	0.00348766
NRARP	-1.0528	0.000573389
PCSK4	-1.05123	0.0199813
POC1A	-1.0511	0.00419793
TTC34	-1.04866	0.0254167
UBALD2	-1.04864	0.000334477
MIR3687	-1.04832	0.038068
TNRC18P3	-1.04756	0.0229809
MESP1	-1.0475	0.00811599
EHHADH	-1.04681	0.0123556
RP11-693J15.5	-1.0465	0.0175728
SBSPON	-1.04565	0.0440314
C21orf58	-1.04265	0.000845522
GLYCTK	-1.04191	0.00371704
SEC61A1	-1.04125	0.000358738
KIF5A	-1.03992	0.00405847
PDGFRL	-1.03825	0.0365009
RP1-39G22.7	-1.03721	0.0157312
UCN	-1.03702	0.0118162
TIGD2	-1.03644	0.0220705
CALCOCO1	-1.03574	0.00133268
MMP11	-1.0327	0.0109922
SPOCK2	-1.03219	0.0187584
SIM2	-1.03173	0.0041643
NUMA1	-1.03152	0.000345972
BRD8	-1.03089	0.000746019
MEIS1	-1.02981	0.00169406
TMEM255A	-1.02969	0.00419212
P2RY2	-1.02819	0.0262359
SDCCAG8	-1.02769	0.00130211
NDC80	-1.0267	0.0013169
RP11-977G19.5	-1.02616	0.0141401
TOM1	-1.02479	0.00385061
ATG9B	-1.02441	0.0249876
TRIM45	-1.02393	0.0423151
CCDC162P	-1.02389	0.019551
ARHGEF10L	-1.02355	0.00085862
VIPAS39	-1.01979	0.00162145
HES6	-1.01676	0.00341616
CXXC11	-1.01671	0.000274898
SNAP23	-1.01527	0.00711721
PBXIP1	-1.01432	0.000335755
HSD17B11	-1.01426	0.0249941
SMIM14	-1.01417	0.00407627
FCGRT	-1.01343	0.00360874
ST3GAL6	-1.01231	0.00301875
NYAP1	-1.01219	0.0130471
ILF3-AS1	-1.01172	0.00193281
NFIB	-1.01113	0.000288019
HIST2H2BD	-1.011	0.0404155
PLVAP	-1.01044	0.0483012
RP11-102N12.3	-1.01008	0.0389299
LOH12CR2	-1.00989	0.0410969
CDC42EP4	-1.00955	0.00181235
LRRN2	-1.00895	0.00120971
MIR3615	-1.00891	0.0218736
PPIC	-1.00836	0.0480135
ASCL1	-1.00566	0.0010382
KIAA1614	-1.00479	0.00158678
RN7SK	-1.00241	0.00688874
MPPED2	-1.00168	0.00382754
ANGEL1	-1.00106	0.000909882
RP11-119F7.5	-1.00096	0.00393492
CENPQ	-1.00071	0.00344586
SUV420H2	-1.00069	0.00289729
TOLLIP-AS1	-0.997831	0.0296261
SLC43A1	-0.997812	0.0025074
ANKFN1	-0.997498	0.0252115
AMIGO1	-0.996772	0.00150993
LINC01003	-0.996701	0.00235716
TARS2	-0.996369	0.00665233
FUT2	-0.995037	0.0211621
TMEFF1	-0.995036	0.00108765
CD200	-0.994639	0.0299543
PTCHD2	-0.994032	0.00941133
REP15	-0.992944	0.0211755
TCF7L2	-0.992772	0.00230947
TMEM35	-0.991928	0.00282232
MUTYH	-0.991764	0.00100936
WHSC1	-0.99122	0.00155615
CRELD1	-0.990808	0.00228747
MIR17HG	-0.990412	0.0201669
EAPP	-0.987892	0.00260654
TEN1	-0.987658	0.0434897
RP11-420L9.5	-0.986464	0.00731915
LINC00639	-0.985645	0.0137731
RXRA	-0.985593	0.000315268
POU3F3	-0.985359	0.000239676
COLQ	-0.985335	0.0358505
STOX2	-0.983784	0.00337382
TSNARE1	-0.98153	0.00324826
DLX2	-0.981379	0.00328809
RGS3	-0.979623	0.000706944
C3orf18	-0.979514	0.00996629
GCLC	-0.979346	0.00441271
FUZ	-0.97934	0.0047497
PROCA1	-0.978074	0.0425284
BCOR	-0.97782	0.00505791
ZFYVE1	-0.976999	0.00307292
KATNAL2	-0.976799	0.0045672
GLRB	-0.976506	0.00344898
TTK	-0.976245	0.00198967
TMEM42	-0.976243	0.00560449
HIRIP3	-0.976022	0.00168951
CDC25B	-0.975722	0.000335755
ABHD8	-0.973921	0.00228707
ZNF438	-0.972177	0.0120352
LINC00638	-0.971296	0.0244622
HERC2P2	-0.971116	0.0011609
ZHX2	-0.970287	0.00267166
GOLPH3L	-0.96921	0.0283664
LYRM7	-0.968763	0.0441569
GATM	-0.968476	0.0443995
PLXNA2	-0.967805	0.00035098
BMP7	-0.96734	0.000283562
BAZ2B	-0.967166	0.00108818
CRIPT	-0.966604	0.00269662
IFNAR1	-0.966463	0.00185727
CTD-2510F5.4	-0.965697	0.0281983
IFT20	-0.964917	0.0043513
RGMA	-0.964397	0.00470752
MAST1	-0.963339	0.00226817
CCDC163P	-0.962996	0.0366422
NMNAT1	-0.960429	0.0189872
RENBP	-0.960373	0.00301338
ARFGAP1	-0.95875	0.000590261
CDK19	-0.957667	0.00113285
RP11-93B14.5	-0.957503	0.00376681
RP1-283E3.4	-0.957364	0.00236859
DDIT4	-0.957151	0.00024423
RP5-894A10.2	-0.954786	0.0174988
E2F2	-0.954754	0.00139267
RP4-740C4.6	-0.953	0.0235913
AASDHPPT	-0.952672	0.00254952
PDPK1	-0.952552	0.0488463
RALGDS	-0.950966	0.000408957
OIP5	-0.950202	0.0119315
SNHG5	-0.949757	0.00107344
RP11-97C16.1	-0.949334	0.0390569
H1F0	-0.948646	0.000446355
HCN3	-0.948445	0.00521927
RIMBP3C	-0.947937	0.0420238
MYT1	-0.947127	0.00445208
TMEM143	-0.946017	0.00773188
HSFX2	-0.945935	0.0268524
THAP2	-0.945642	0.0155519
RCBTB2	-0.945366	0.0230372
HRSP12	-0.944977	0.00343273
ATCAY	-0.944891	0.000753537
ZNF491	-0.944826	0.0155616
LYPD6	-0.944611	0.00267166
MTUS1	-0.944427	0.00518778
CENPF	-0.944081	0.000282388
DICER1-AS1	-0.942895	0.049766
DYRK1B	-0.942271	0.00345993
MND1	-0.941168	0.00754681
FUCA1	-0.939677	0.00873619
JUP	-0.93901	0.00118413
NRG2	-0.937452	0.0014066
PMEPA1	-0.937129	0.00409286
SSBP3	-0.936084	0.000358894
TCF7L1	-0.935459	0.0435638
ATXN7L1	-0.9347	0.0410473
TNK2	-0.934584	0.000346971
TUB	-0.934378	0.00186554
AMDHD2	-0.934194	0.00616729
ZNF844	-0.933882	0.00515875
RP11-337C18.9	-0.933758	0.0455305
KAT6B	-0.931131	0.000957321
ZNF575	-0.930964	0.0402024
PLEKHA7	-0.928986	0.0017864
PCOLCE	-0.928917	0.00409901
GS1-393G12.12	-0.927804	0.0234681
ARHGEF19	-0.924432	0.0017864
RPP25L	-0.921039	0.0011609
RAD51AP1	-0.92095	0.0185205
HMMR	-0.920079	0.00316618
FAM171A2	-0.919447	0.000459512
EZH1	-0.919253	0.00124695
UBE2H	-0.918886	0.000400248
RANBP3L	-0.918229	0.0183847
TSNAXIP1	-0.917547	0.0306025
CTD-2521M24.4	-0.917248	0.0263075
STX10	-0.916869	0.00244321
FBXL8	-0.91596	0.00862934
MMP15	-0.914818	0.00084929
SEPP1	-0.914519	0.0201235
MARCKS	-0.913965	9.13306e-05
FAM13C	-0.913839	0.0210155
HIST1H1C	-0.911573	0.0218884
TMEM106C	-0.911113	0.00434136
CDC20P1	-0.91106	0.0283589
RP11-252A24.7	-0.908672	0.0026397
ST20-MTHFS	-0.907953	0.0210926
RP11-849I19.1	-0.907478	0.00269652
C16orf71	-0.907049	0.046703
C5orf54	-0.906546	0.00785787
PRUNE	-0.90566	0.0240331
SEMA4B	-0.904337	0.0018143
KLF11	-0.90207	0.00194441
RP4-717I23.3	-0.899502	0.0367981
SPIB	-0.899457	0.0245508
PPAPDC2	-0.898569	0.00290921
LIX1L	-0.898284	0.00120965
RP5-837J1.2	-0.896147	0.0135718
DEDD2	-0.895735	0.0187398
RP11-83A24.2	-0.893711	0.0287604
KLHL7	-0.89231	0.00270718
CHMP1B	-0.890366	0.000920034
SRGAP3	-0.890228	0.00187156
CDO1	-0.890075	0.00311175
CXorf24	-0.889808	0.0160048
KLC4	-0.889468	0.00184041
CCDC146	-0.889033	0.0458309
TLE2	-0.887636	0.00124788
RAB11B-AS1	-0.887588	0.0166899
HMGCL	-0.887111	0.00245755
CMC1	-0.886419	0.0146413
CLEC18B	-0.886191	0.0462069
RP11-271K21.11	-0.886023	0.00185315
FAM189B	-0.885251	0.00269233
C11orf71	-0.884316	0.0462934
CKS2	-0.884023	0.000582065
SLC4A4	-0.883346	0.039941
RP11-635N19.1	-0.882125	0.0333716
PARD6A	-0.881019	0.0182015
PAIP2	-0.880996	0.000938484
RP5-1074L1.4	-0.880706	0.0152236
AKAP1	-0.879731	0.0358283
IRX1	-0.878736	0.00116272
XXbac-BPGBPG55C20.2	-0.878604	0.0433807
BBS2	-0.87835	0.00171763
ZNF524	-0.878258	0.0147276
VMAC	-0.877662	0.0163434
ECSIT	-0.876998	0.00514312
LL22NC03-2H8.5	-0.876777	0.0395192
WNT10A	-0.874951	0.0251611
2019-03-08	-0.873952	0.00592643
LIN52	-0.872942	0.00350941
CCNB2	-0.871958	0.0011524
SUPT3H	-0.871542	0.0295403
MIS18BP1	-0.871477	0.00162682
GPSM2	-0.871405	0.000755062
LETMD1	-0.870539	0.00225324
USP20	-0.870501	0.000909383
ACSS1	-0.87039	0.000365405
AC018737.1	-0.870007	0.0358164
INPP5K	-0.868544	0.00397399
GPC4	-0.867705	0.0118124
FAM53B	-0.867572	0.000516647
C20orf112	-0.866582	0.000822497
RPL24P2	-0.865437	0.0387581
WDSUB1	-0.86534	0.0152787
RND1	-0.865085	0.0120154
EME1	-0.864369	0.00838726
PHC1P1	-0.86416	0.0155856
RNF208	-0.863974	0.00283589
HERC2P3	-0.863588	0.00102125
GNAO1	-0.863416	0.000965254
RP11-363E6.3	-0.863288	0.0401968
FAM27E3	-0.862159	0.011926
CNTFR	-0.861725	0.00114552
ARHGEF9	-0.861144	0.00171574
CTSF	-0.8611	0.000540185
TRADD	-0.858601	0.00603204
HILPDA	-0.858203	0.00417054
LMO4	-0.856762	0.000531025
CTD-2619J13.19	-0.856724	0.0375911
IFT172	-0.85667	0.00541663
MITF	-0.854629	0.00476738
ZNF184	-0.854555	0.00478919
RP11-211N8.3	-0.852949	0.0450367
ZFP14	-0.852943	0.00607058
CCNB3	-0.851481	0.00419212
RP11-254F7.2	-0.850556	0.0244103
LDB1	-0.850484	0.000335755
CTC-444N24.8	-0.850454	0.0258332
BBS9	-0.849256	0.00742283
RP11-923I11.7	-0.848484	0.0149584
AC021188.4	-0.848181	0.0173802
RGS16	-0.847589	0.000730724
RP11-521B24.3	-0.847331	0.0115092
FBXO2	-0.84691	0.0135077
CITED2	-0.845829	0.000420389
YPEL5	-0.845672	0.00134642
ZFYVE28	-0.845643	0.033873
XRRA1	-0.844831	0.0332529
RP11-480I12.5	-0.844189	0.00389778
ATP1A2	-0.843976	0.00805493
AC022007.5	-0.843801	0.0412035
CROCC	-0.842656	0.00146113
CCDC154	-0.842342	0.0448287
ZCCHC18	-0.841439	0.00396249
RP11-351J23.2	-0.84061	0.0176983
PPP1R9A	-0.838704	0.00174829
NUF2	-0.837877	0.00352425
NFIA	-0.837677	0.000876483
EXTL2	-0.836141	0.00624989
RP11-91J19.4	-0.835548	0.0183379
TBC1D2	-0.834792	0.0265331
2019-09-01	-0.834677	0.0174197
TBC1D17	-0.834259	0.00165792
KLHL21	-0.833704	0.000433003
KLF13	-0.833424	0.00085862
TMEM102	-0.833144	0.013679
EFNA1	-0.833079	0.00971653
C19orf57	-0.832801	0.00341616
SULT1C4	-0.832464	0.0413836
MUT	-0.83178	0.00143393
ABCC6	-0.829922	0.0132936
MUM1	-0.828185	0.000996969
CXCL2	-0.828096	0.0348811
BZRAP1	-0.827113	0.0129899
GDPD1	-0.825607	0.032203
C1orf56	-0.825295	0.0100705
CTD-2574D22.2	-0.824088	0.0377903
C5orf55	-0.823947	0.012237
MPST	-0.823439	0.000459512
RP11-923I11.6	-0.82328	0.0305603
GPR173	-0.82323	0.00150296
RP11-169K16.9	-0.822435	0.00424539
BRD3	-0.822288	0.000824015
BCL7A	-0.821948	0.00109739
HTRA2	-0.820677	0.00951616
FAM43B	-0.819542	0.0104942
SP5	-0.817486	0.0276407
FGFR3	-0.817466	0.000586572
MAT2B	-0.817315	0.00157392
DNAJB4	-0.816273	0.0059228
POLR3GL	-0.816028	0.00455863
MBOAT1	-0.81337	0.0328494
CTA-29F11.1	-0.811726	0.0248672
TMEM161B-AS1	-0.81136	0.0179822
PCCA	-0.811347	0.00388942
SP9	-0.811051	0.00521358
TOP2A	-0.811047	0.000283562
CAPS	-0.811046	0.0115241
ITGB5	-0.810306	0.00307777
ULK1	-0.80971	0.000836629
LIMCH1	-0.809692	0.0167292
RP11-101E13.5	-0.8096	0.00702949
ECE2	-0.809467	0.00485711
ACBD4	-0.807701	0.012237
H2AFJ	-0.807226	0.0155212
RECQL5	-0.806245	0.00173118
TRIL	-0.805708	0.00167051
MED30	-0.804787	0.00698658
ANKRA2	-0.803393	0.0203366
CRB2	-0.802734	0.000335755
MKS1	-0.802067	0.0215263
RP11-308D16.4	-0.800977	0.0334469
RSAD1	-0.800268	0.0035624
