# Supplementary material for: EGFR Activates a TAZ-Driven Oncogenic Program in Glioblastoma
Source: Oxford University Press journal article supplement (doi:10.1158/0008-5472.can-20-2773), 2021-04-28
Supplement: 00085472can202773-sup-249394_3_supp_7061817_qrthcq.xlsx [file 00085472can202773-sup-249394_3_supp_7061817_qrthcq.xlsx]

## Sheet: Up Regulated Genes
Gene Symbol	Name
A2M	alpha-2-macroglobulin
AARSD1	alanyl-tRNA synthetase domain containing 1
ABCA11P	ATP binding cassette subfamily A member 11, pseudogene
ABCA12	ATP binding cassette subfamily A member 12
ABCA2	ATP binding cassette subfamily A member 2
ABCC3	ATP binding cassette subfamily C member 3
ABCC6P1	ATP binding cassette subfamily C member 6 pseudogene 1
ABCD1	ATP binding cassette subfamily D member 1
ABL2	ABL proto-oncogene 2, non-receptor tyrosine kinase
ABLIM1	actin binding LIM protein 1
ACAD11	acyl-CoA dehydrogenase family member 11
ACHE	acetylcholinesterase (Cartwright blood group)
ACO1	aconitase 1
ACAT2	acetyl-CoA acetyltransferase 2
ACER2	alkaline ceramidase 2
ACSS2	acyl-CoA synthetase short chain family member 2
ACSS3	acyl-CoA synthetase short chain family member 3
ACOX2	acyl-CoA oxidase 2
ACSBG1	acyl-CoA synthetase bubblegum family member 1
ACTG1P10	actin gamma 1 pseudogene 10
ACTG1	actin gamma 1
ACTBP11	ACTB pseudogene 11
ACTA2	actin alpha 2, smooth muscle
ADAM11	ADAM metallopeptidase domain 11
ACTR3	actin related protein 3
ACTN2	actinin alpha 2
ACTN1	actinin alpha 1
ADAMTS10	ADAM metallopeptidase with thrombospondin type 1 motif 10
ADAM9	ADAM metallopeptidase domain 9
ADAM19	ADAM metallopeptidase domain 19
ADAM12	ADAM metallopeptidase domain 12
ADAMTS4	ADAM metallopeptidase with thrombospondin type 1 motif 4
ADAMTS3	ADAM metallopeptidase with thrombospondin type 1 motif 3
ADAMTS16	ADAM metallopeptidase with thrombospondin type 1 motif 16
ADAMTS15	ADAM metallopeptidase with thrombospondin type 1 motif 15
ADNP	activity dependent neuroprotector homeobox
ADORA2B	adenosine A2b receptor
GRK3	G protein-coupled receptor kinase 3
ADSS1	adenylosuccinate synthase 1
ADAMTS9	ADAM metallopeptidase with thrombospondin type 1 motif 9
ADCY1	adenylate cyclase 1
ADCY5	adenylate cyclase 5
ADM	adrenomedullin
AGAP2	ArfGAP with GTPase domain, ankyrin repeat and PH domain 2
AGFG2	ArfGAP with FG repeats 2
AGO2	argonaute RISC catalytic component 2
GPAT3	glycerol-3-phosphate acyltransferase 3
AEBP1	AE binding protein 1
AEN	apoptosis enhancing nuclease
AFF3	AF4/FMR2 family member 3
AGAP1	ArfGAP with GTPase domain, ankyrin repeat and PH domain 1
CRYBG1	crystallin beta-gamma domain containing 1
AHR	aryl hydrocarbon receptor
AK4P1	adenylate kinase 4 pseudogene 1
AK4	adenylate kinase 4
AHCTF1	AT-hook containing transcription factor 1
AGT	angiotensinogen
AHNAK2	AHNAK nucleoprotein 2
AHNAK	AHNAK nucleoprotein
AKAP6	A-kinase anchoring protein 6
AKAP5	A-kinase anchoring protein 5
AKR7A3	aldo-keto reductase family 7 member A3
AK7	adenylate kinase 7
AK4P3	adenylate kinase 4 pseudogene 3
PALM2AKAP2*	PALM2 and AKAP2 fusion
AKAP12	A-kinase anchoring protein 12
AMIGO2	adhesion molecule with Ig like domain 2
AMMECR1	AMMECR nuclear protein 1
ALG10B	ALG10 alpha-1,2-glucosyltransferase B
ALPK2	alpha kinase 2
ALDH1L2	aldehyde dehydrogenase 1 family member L2
ALDOC	aldolase, fructose-bisphosphate C
ANKRD20A2 (includes others)*	ankyrin repeat domain 20 family member A2
ANKRD20A2 (includes others)*	ankyrin repeat domain 20 family member A2
ANKLE1	ankyrin repeat and LEM domain containing 1
ANKRD18EP	ankyrin repeat domain 18E, pseudogene
ANK2	ankyrin 2
ANKHD1/ANKHD1-EIF4EBP3	ankyrin repeat and KH domain containing 1
AMPD3	adenosine monophosphate deaminase 3
ANGPTL4	angiopoietin like 4
ANXA1	annexin A1
ANKRD45	ankyrin repeat domain 45
ANKRD42	ankyrin repeat domain 42
ANKRD36C	ankyrin repeat domain 36C
ANKRD34A	ankyrin repeat domain 34A
ANKRD33B	ankyrin repeat domain 33B
ANKRD27	ankyrin repeat domain 27
ANKRD20A2 (includes others)*	ankyrin repeat domain 20 family member A2
APLN	apelin
AP3S2	adaptor related protein complex 3 subunit sigma 2
AP1S3	adaptor related protein complex 1 subunit sigma 3
AP1S1	adaptor related protein complex 1 subunit sigma 1
ANXA2	annexin A2
ANXA11	annexin A11
ARHGAP25	Rho GTPase activating protein 25
ARHGAP18	Rho GTPase activating protein 18
ARHGAP29	Rho GTPase activating protein 29
ARHGAP26	Rho GTPase activating protein 26
ARHGAP32	Rho GTPase activating protein 32
ARHGAP31	Rho GTPase activating protein 31
ARHGEF16	Rho guanine nucleotide exchange factor 16
ARHGDIG	Rho GDP dissociation inhibitor gamma
APOL6	apolipoprotein L6
APOL4	apolipoprotein L4
AQP3	aquaporin 3 (Gill blood group)
AQP1	aquaporin 1 (Colton blood group)
ARC	activity regulated cytoskeleton associated protein
ARAP3	ArfGAP with RhoGAP domain, ankyrin repeat and PH domain 3
ARHGAP11A	Rho GTPase activating protein 11A
ARF6	ADP ribosylation factor 6
ARSI	arylsulfatase family member I
ARSJ	arylsulfatase family member J
ASB2	ankyrin repeat and SOCS box containing 2
ASCC3	activating signal cointegrator 1 complex subunit 3
ASMTL	acetylserotonin O-methyltransferase like
ASPHD2	aspartate beta-hydroxylase domain containing 2
ASS1P12	argininosuccinate synthetase 1 pseudogene 12
ATP10A	ATPase phospholipid transporting 10A (putative)
ARHGEF4	Rho guanine nucleotide exchange factor 4
ARID3A	AT-rich interaction domain 3A
ARID3B	AT-rich interaction domain 3B
ARID5B	AT-rich interaction domain 5B
ARL13B	ADP ribosylation factor like GTPase 13B
ARPC1B	actin related protein 2/3 complex subunit 1B
ARPC4-TTLL3	ARPC4-TTLL3 readthrough
ARSG	arylsulfatase G
B3GALT5	beta-1,3-galactosyltransferase 5
AXL	AXL receptor tyrosine kinase
AUTS2	activator of transcription and developmental regulator AUTS2
ATXN7	ataxin 7
BACE2	beta-secretase 2
BAALC	BAALC binder of MAP3K1 and KLF4
B4GALT5	beta-1,4-galactosyltransferase 5
B4GALNT3	beta-1,4-N-acetyl-galactosaminyltransferase 3
ATP2B1	ATPase plasma membrane Ca2+ transporting 1
ATP2A3	ATPase sarcoplasmic/endoplasmic reticulum Ca2+ transporting 3
ATP1B2	ATPase Na+/K+ transporting subunit beta 2
ATP13A3	ATPase 13A3
ATXN1	ataxin 1
ATR	ATR serine/threonine kinase
ATP6V0A1	ATPase H+ transporting V0 subunit a1
ATP2B2	ATPase plasma membrane Ca2+ transporting 2
BEGAIN	brain enriched guanylate kinase associated
BEND3P3	BEN domain containing 3 pseudogene 3
BDNF	brain derived neurotrophic factor
BDP1	B double prime 1, subunit of RNA polymerase III transcription initiation factor IIIB
BIRC3	baculoviral IAP repeat containing 3
BIRC6	baculoviral IAP repeat containing 6
BEND4	BEN domain containing 4
BICC1	BicC family RNA binding protein 1
BAIAP2	BAR/IMD domain containing adaptor protein 2
BAIAP2-DT	BAIAP2 divergent transcript
BACH2	BTB domain and CNC homolog 2
ADGRB1	adhesion G protein-coupled receptor B1
BCL2	BCL2 apoptosis regulator
BCL3	BCL3 transcription coactivator
BAK1P1	BCL2 antagonist/killer 1 pseudogene 1
BATF3	basic leucine zipper ATF-like transcription factor 3
TIGAR	TP53 induced glycolysis regulatory phosphatase
DDIAS	DNA damage induced apoptosis suppressor
C12orf75	chromosome 12 open reading frame 75
CCDC184	coiled-coil domain containing 184
BZW1P2	basic leucine zipper and W2 domains 1 pseudogene 2
BTBD19	BTB domain containing 19
C10orf67	chromosome 10 open reading frame 67
LCOR	ligand dependent nuclear receptor corepressor
BSN	bassoon presynaptic cytomatrix protein
BRINP2	BMP/retinoic acid inducible neural specific 2
BTAF1	B-TFIID TATA-box binding protein associated factor 1
BST1	bone marrow stromal cell antigen 1
BMP8B	bone morphogenetic protein 8b
BLZF1	basic leucine zipper nuclear factor 1
BNIP3	BCL2 interacting protein 3
BNC2	basonuclin 2
C3orf52	chromosome 3 open reading frame 52
C4orf19	chromosome 4 open reading frame 19
C6orf118	chromosome 6 open reading frame 118
C6orf223	chromosome 6 open reading frame 223
C21orf62	chromosome 21 open reading frame 62
C2CD4A	C2 calcium dependent domain containing 4A
C2orf72	chromosome 2 open reading frame 72
C2orf80	chromosome 2 open reading frame 80
C1orf220	chromosome 1 open reading frame 220 (putative)
C1QL1	complement C1q like 1
C1QL4	complement C1q like 4
C1RL	complement C1r subcomponent like
LINC01619	long intergenic non-protein coding RNA 1619
CCDC9B	coiled-coil domain containing 9B
C18orf25	chromosome 18 open reading frame 25
MIR29B2CHG	MIR29B2 and MIR29C host gene
CAMK2D	calcium/calmodulin dependent protein kinase II delta
CAMK2B	calcium/calmodulin dependent protein kinase II beta
CAMK2A	calcium/calmodulin dependent protein kinase II alpha
CACNG8	calcium voltage-gated channel auxiliary subunit gamma 8
CACNG5	calcium voltage-gated channel auxiliary subunit gamma 5
CACNB4	calcium voltage-gated channel auxiliary subunit beta 4
CACNA1I	calcium voltage-gated channel subunit alpha1 I
CABIN1	calcineurin binding protein 1
CA9	carbonic anhydrase 9
CA2	carbonic anhydrase 2
CA13	carbonic anhydrase 13
CA12	carbonic anhydrase 12
CARD19	caspase recruitment domain family member 19
C8orf58	chromosome 8 open reading frame 58
BAALC-AS2	BAALC antisense RNA 2
VXN	vexin
BICDL1	BICD family like cargo adaptor 1
CCDC65	coiled-coil domain containing 65
CCDC144CP	coiled-coil domain containing 144C, pseudogene
CFAP45	cilia and flagella associated protein 45
CCDC113	coiled-coil domain containing 113
CCDC144B	coiled-coil domain containing 144B (pseudogene)
CBLN1	cerebellin 1 precursor
CCDC102B	coiled-coil domain containing 102B
CASP7	caspase 7
CBL	Cbl proto-oncogene
CARD10	caspase recruitment domain family member 10
CARS1	cysteinyl-tRNA synthetase 1
CAPN5	calpain 5
CAPRIN2	caprin family member 2
CAMKK1	calcium/calmodulin dependent protein kinase kinase 1
CAPN2	calpain 2
CD9	CD9 molecule
CD82	CD82 molecule
CD74	CD74 molecule
CD63	CD63 molecule
CDC42EP1	CDC42 effector protein 1
CDC42	cell division cycle 42
CD99P1	CD99 molecule pseudogene 1
ADGRE5	adhesion G protein-coupled receptor E5
CDHR2	cadherin related family member 2
CDH6	cadherin 6
CDC42EP3	CDC42 effector protein 3
CDC42EP2	CDC42 effector protein 2
CDKN2B	cyclin dependent kinase inhibitor 2B
CDKN1A	cyclin dependent kinase inhibitor 1A
CDKL5	cyclin dependent kinase like 5
CDK6	cyclin dependent kinase 6
CCDC88A	coiled-coil domain containing 88A
CCDC88B	coiled-coil domain containing 88B
CCDC74A	coiled-coil domain containing 74A
CCDC74B	coiled-coil domain containing 74B
CCND1	cyclin D1
CCR1	C-C motif chemokine receptor 1
CCL2	C-C motif chemokine ligand 2
CCL8	C-C motif chemokine ligand 8
CD109	CD109 molecule
CD248	CD248 molecule
NOCT	nocturnin
CCT6B	chaperonin containing TCP1 subunit 6B
CD44	CD44 molecule (Indian blood group)
CD6	CD6 molecule
CD274	CD274 molecule
CD302	CD302 molecule
CHST11	carbohydrate sulfotransferase 11
CHRNA9	cholinergic receptor nicotinic alpha 9 subunit
CHST6	carbohydrate sulfotransferase 6
CHST2	carbohydrate sulfotransferase 2
CHST8	carbohydrate sulfotransferase 8
CHST7	carbohydrate sulfotransferase 7
CICP22	capicua transcriptional repressor pseudogene 22
CHSY1	chondroitin sulfate synthase 1
CILP2	cartilage intermediate layer protein 2
CIITA	class II major histocompatibility complex transactivator
CKMT1A/CKMT1B	creatine kinase, mitochondrial 1B
CISH	cytokine inducible SH2 containing protein
CLCN5	chloride voltage-gated channel 5
CLCF1	cardiotrophin like cytokine factor 1
CLIC1P1	chloride intracellular channel 1 pseudogene 1
CLDN4	claudin 4
CELSR1	cadherin EGF LAG seven-pass G-type receptor 1
CEP170B	centrosomal protein 170B
CEP290	centrosomal protein 290
CEP85L	centrosomal protein 85 like
CFH	complement factor H
CGN	cingulin
CH25H	cholesterol 25-hydroxylase
CHD9	chromodomain helicase DNA binding protein 9
CHGB	chromogranin B
CHI3L1	chitinase 3 like 1
CHMP2B	charged multivesicular body protein 2B
CHPF	chondroitin polymerizing factor
CHPF2	chondroitin polymerizing factor 2
CHRD	chordin
CHRM3-AS2	CHRM3 antisense RNA 2
CHRNA3	cholinergic receptor nicotinic alpha 3 subunit
COL4A3	collagen type IV alpha 3 chain
COL4A1	collagen type IV alpha 1 chain
COL27A1	collagen type XXVII alpha 1 chain
COL26A1	collagen type XXVI alpha 1 chain
COL1A1	collagen type I alpha 1 chain
COL14A1	collagen type XIV alpha 1 chain
COBLL1	cordon-bleu WH2 repeat protein like 1
COBL	cordon-bleu WH2 repeat protein
COTL1	coactosin like F-actin binding protein 1
CORO6	coronin 6
CORO2B	coronin 2B
CORO2A	coronin 2A
CORO1A	coronin 1A
COLGALT1	collagen beta(1-O)galactosyltransferase 1
COL6A1	collagen type VI alpha 1 chain
COL4A4	collagen type IV alpha 4 chain
CMKLR1	chemerin chemokine-like receptor 1
CMTM7	CKLF like MARVEL transmembrane domain containing 7
CLMP	CXADR like membrane protein
CLRN1	clarin 1
CLIP4	CAP-Gly domain containing linker protein family member 4
CLMN	calmin
CLIP1	CAP-Gly domain containing linker protein 1
CLIP2	CAP-Gly domain containing linker protein 2
CNTNAP3	contactin associated protein like 3
CNTNAP3B	contactin associated protein like 3B
CNNM1	cyclin and CBS domain divalent metal cation transport mediator 1
CNTF	ciliary neurotrophic factor
CNN2	calponin 2
CNN3	calponin 3
CMTM8	CKLF like MARVEL transmembrane domain containing 8
CNIH3	cornichon family AMPA receptor auxiliary protein 3
CTBS	chitobiase
CSPG4P11	chondroitin sulfate proteoglycan 4 pseudogene 11
CSPG4	chondroitin sulfate proteoglycan 4
CSRNP1	cysteine and serine rich nuclear protein 1
CSPG4P13	chondroitin sulfate proteoglycan 4 pseudogene 13
CPLX2	complexin 2
CPNE2	copine 2
CPNE4	copine 4
CPNE5	copine 5
CPA2	carboxypeptidase A2
CPA4	carboxypeptidase A4
CPEB2	cytoplasmic polyadenylation element binding protein 2
CPEB4	cytoplasmic polyadenylation element binding protein 4
CRYBB1	crystallin beta B1
CSDC2	cold shock domain containing C2
CSGALNACT1	chondroitin sulfate N-acetylgalactosaminyltransferase 1
CSNK1G1	casein kinase 1 gamma 1
CPNE8	copine 8
CRABP2	cellular retinoic acid binding protein 2
CREB3L1	cAMP responsive element binding protein 3 like 1
CRLF1	cytokine receptor like factor 1
DDX21	DExD-box helicase 21
DDX59	DEAD-box helicase 59
DDHD1	DDHD domain containing 1
DDR2	discoidin domain receptor tyrosine kinase 2
DGCR9	DiGeorge syndrome critical region gene 9
DGKA	diacylglycerol kinase alpha
DEGS1	delta 4-desaturase, sphingolipid 1
DGCR5	DiGeorge syndrome critical region gene 5
CYTL1	cytokine like 1
DAGLA	diacylglycerol lipase alpha
CYP51A1	cytochrome P450 family 51 subfamily A member 1
CCN1	cellular communication network factor 1
DCST1	DC-STAMP domain containing 1
DDB2	damage specific DNA binding protein 2
DCBLD2	discoidin, CUB and LCCL domain containing 2
DCLK1	doublecortin like kinase 1
CYFIP2	cytoplasmic FMR1 interacting protein 2
CYB5D1	cytochrome b5 domain containing 1
CYB561	cytochrome b561
CXorf38	chromosome X open reading frame 38
CYP4F11	cytochrome P450 family 4 subfamily F member 11
CYP2E1	cytochrome P450 family 2 subfamily E member 1
CYP1B1	cytochrome P450 family 1 subfamily B member 1
CYGB	cytoglobin
CUBN	cubilin
CCN2	cellular communication network factor 2
CXCR4	C-X-C motif chemokine receptor 4
CXCL9	C-X-C motif chemokine ligand 9
CXCL11	C-X-C motif chemokine ligand 11
CX3CL1	C-X3-C motif chemokine ligand 1
DOCK6	dedicator of cytokinesis 6
DOK4	docking protein 4
DOK6	docking protein 6
DOK7	docking protein 7
DOT1L	DOT1 like histone lysine methyltransferase
DPF3	double PHD fingers 3
DPP8	dipeptidyl peptidase 8
DRAM1	DNA damage regulated autophagy modulator 1
DMTN	dematin actin binding protein
DMXL2	Dmx like 2
DNAH1	dynein axonemal heavy chain 1
DNAJB1	DnaJ heat shock protein family (Hsp40) member B1
DNAJC22	DnaJ heat shock protein family (Hsp40) member C22
DNM1	dynamin 1
DNMBP	dynamin binding protein
DOCK4	dedicator of cytokinesis 4
DIAPH3	diaphanous related formin 3
DIAPH2	diaphanous related formin 2
DLC1	DLC1 Rho GTPase activating protein
DIRAS2	DIRAS family GTPase 2
DLG4	discs large MAGUK scaffold protein 4
DLEU1	deleted in lymphocytic leukemia 1
DLST	dihydrolipoamide S-succinyltransferase
DLK2	delta like non-canonical Notch ligand 2
DGKG	diacylglycerol kinase gamma
DGKE	diacylglycerol kinase epsilon
DGKI	diacylglycerol kinase iota
DGKH	diacylglycerol kinase eta
DHCR24	24-dehydrocholesterol reductase
DGKZ	diacylglycerol kinase zeta
DHPS	deoxyhypusine synthase
DHCR7	7-dehydrocholesterol reductase
EHD2	EH domain containing 2
EHD4	EH domain containing 4
EGR3	early growth response 3
EHBP1L1	EH domain binding protein 1 like 1
EGR1	early growth response 1
EGR2	early growth response 2
EGFR-AS1	EGFR antisense RNA 1
EGLN3	egl-9 family hypoxia inducible factor 3
EGFL7	EGF like domain multiple 7
EGFR	epidermal growth factor receptor
EGF	epidermal growth factor
EGFEM1P	EGF like and EMI domain containing 1, pseudogene
EFHC2	EF-hand domain containing 2
EFNA3	ephrin A3
EFCC1	EF-hand and coiled-coil domain containing 1
EFHC1	EF-hand domain containing 1
CRACR2A	calcium release activated channel regulator 2A
EEPD1	endonuclease/exonuclease/phosphatase family domain containing 1
EEA1	early endosome antigen 1
EDEM1	ER degradation enhancing alpha-mannosidase like protein 1
EDA2R	ectodysplasin A2 receptor
E2F7	E2F transcription factor 7
DNAAF4-CCPG1	DNAAF4-CCPG1 readthrough (NMD candidate)
DYNC2H1	dynein cytoplasmic 2 heavy chain 1
DUSP9	dual specificity phosphatase 9
DUSP8	dual specificity phosphatase 8
DUSP6	dual specificity phosphatase 6
DUSP5	dual specificity phosphatase 5
DUSP4	dual specificity phosphatase 4
DUSP3	dual specificity phosphatase 3
DTX1	deltex E3 ubiquitin ligase 1
DSCAM	DS cell adhesion molecule
ERC1	ELKS/RAB6-interacting/CAST family member 1
ERN1	endoplasmic reticulum to nucleus signaling 1
ERRFI1	ERBB receptor feedback inhibitor 1
ERVK13-1	endogenous retrovirus group K13 member 1
EPHB2	EPH receptor B2
EPPK1	epiplakin 1
EPS8L2	EPS8 like 2
ERBB3	erb-b2 receptor tyrosine kinase 3
EPB41L2	erythrocyte membrane protein band 4.1 like 2
EPB41L4B	erythrocyte membrane protein band 4.1 like 4B
EPHA1	EPH receptor A1
EPHA2	EPH receptor A2
EOGT	EGF domain specific O-linked N-acetylglucosamine transferase
EP300	E1A binding protein p300
EP400P1	EP400 pseudogene 1
EPB41L1	erythrocyte membrane protein band 4.1 like 1
ENG	endoglin
ENDOD1	endonuclease domain containing 1
ENTPD7	ectonucleoside triphosphate diphosphohydrolase 7
ENO2	enolase 2
EML4	EMAP like 4
EML2	EMAP like 2
EMP3	epithelial membrane protein 3
EMP1	epithelial membrane protein 1
EMILIN1	elastin microfibril interfacer 1
ELK4	ETS transcription factor ELK4
EMILIN3	elastin microfibril interfacer 3
EMILIN2	elastin microfibril interfacer 2
ELF4	E74 like ETS transcription factor 4
EIF5A2	eukaryotic translation initiation factor 5A2
ELK3	ETS transcription factor ELK3
ELFN1	extracellular leucine rich repeat and fibronectin type III domain containing 1
TASOR2	transcription activation suppressor family member 2
FAM227A	family with sequence similarity 227 member A
GASK1A	golgi associated kinase 1A
TAFA5	TAFA chemokine like family member 5
FAM184B	family with sequence similarity 184 member B
INSYN2A	inhibitory synaptic factor 2A
FAM181A-AS1	FAM181A antisense RNA 1
FAM184A	family with sequence similarity 184 member A
FAM83F	family with sequence similarity 83 member F
FAM83G	family with sequence similarity 83 member G
FAM72B	family with sequence similarity 72 member B
FAM81A	family with sequence similarity 81 member A
RIPOR2	RHO family interacting cell polarization regulator 2
FAM72A	family with sequence similarity 72 member A
TENT5A	terminal nucleotidyltransferase 5A
FAM49A	family with sequence similarity 49 member A
FBN1	fibrillin 1
FBLIM1	filamin binding LIM protein 1
FAT3	FAT atypical cadherin 3
FAT1	FAT atypical cadherin 1
FAS	Fas cell surface death receptor
FARP2	FERM, ARH/RhoGEF and pleckstrin domain protein 2
LRATD2	LRAT domain containing 2
LRATD1	LRAT domain containing 1
FERMT2	fermitin family member 2
FEM1C	fem-1 homolog C
FDFT1	farnesyl-diphosphate farnesyltransferase 1
FCRLA	Fc receptor like A
FCHSD1	FCH and double SH3 domains 1
FCGR2C	Fc fragment of IgG receptor IIc (gene/pseudogene)
FBXO36	F-box protein 36
FBN2	fibrillin 2
ETS2	ETS proto-oncogene 2, transcription factor
ETV4	ETS variant transcription factor 4
ETV5	ETS variant transcription factor 5
EVA1C	eva-1 homolog C
ERVW-1	endogenous retrovirus group W member 1, envelope
ESYT3	extended synaptotagmin 3
ETNK2	ethanolamine kinase 2
ETS1	ETS proto-oncogene 1, transcription factor
F3	coagulation factor III, tissue factor
FABP5	fatty acid binding protein 5
FABP5P7	fatty acid binding protein 5 pseudogene 7
FABP7	fatty acid binding protein 7
EVC	EvC ciliary complex subunit 1
EXOC6	exocyst complex component 6
F12	coagulation factor XII
F2RL1	F2R like trypsin receptor 1
NIBAN1	niban apoptosis regulator 1
FAM102B	family with sequence similarity 102 member B
FAM131A	family with sequence similarity 131 member A
NIBAN2	niban apoptosis regulator 2
FAH	fumarylacetoacetate hydrolase
FADS3	fatty acid desaturase 3
RFLNB	refilin B
FAHD2CP	fumarylacetoacetate hydrolase domain containing 2C, pseudogene
FAM162A	family with sequence similarity 162 member A
FAM157C	family with sequence similarity 157 member C
FAM181A	family with sequence similarity 181 member A
SLF2	SMC5-SMC6 complex localization factor 2
FAM135A	family with sequence similarity 135 member A
FAM131B	family with sequence similarity 131 member B
FAM157A/FAM157B	family with sequence similarity 157 member A
ALKAL2	ALK and LTK ligand 2
FUT1	fucosyltransferase 1 (H blood group)
FZD5	frizzled class receptor 5
FSIP1	fibrous sheath interacting protein 1
FST	follistatin
G6PD	glucose-6-phosphate dehydrogenase
GAD1	glutamate decarboxylase 1
FZD6	frizzled class receptor 6
FZD9	frizzled class receptor 9
GALNT12	polypeptide N-acetylgalactosaminyltransferase 12
GALNT18	polypeptide N-acetylgalactosaminyltransferase 18
GADD45A	growth arrest and DNA damage inducible alpha
GAL	galanin and GMAP prepropeptide
GAREM1	GRB2 associated regulator of MAPK1 subtype 1
GARNL3	GTPase activating Rap/RanGAP domain like 3
GAP43	growth associated protein 43
GAPDHP14	glyceraldehyde-3-phosphate dehydrogenase pseudogene 14
GBP2	guanylate binding protein 2
GBP1	guanylate binding protein 1
GBE1	1,4-alpha-glucan branching enzyme 1
NIPSNAP2	nipsnap homolog 2
GCLM	glutamate-cysteine ligase modifier subunit
GCK	glucokinase
GCH1	GTP cyclohydrolase 1
GBP5	guanylate binding protein 5
GFAP	glial fibrillary acidic protein
GEM	GTP binding protein overexpressed in skeletal muscle
GDNF	glial cell derived neurotrophic factor
GDF15	growth differentiation factor 15
GIPC3	GIPC PDZ domain containing family member 3
GGN	gametogenetin
GFPT2	glutamine-fructose-6-phosphate transaminase 2
GFOD1	glucose-fructose oxidoreductase domain containing 1
FGF1	fibroblast growth factor 1
FGF2	fibroblast growth factor 2
FGFBP3	fibroblast growth factor binding protein 3
FGFR1	fibroblast growth factor receptor 1
FGFR4	fibroblast growth factor receptor 4
FHL2	four and a half LIM domains 2
FHOD1	formin homology 2 domain containing 1
FILIP1L	filamin A interacting protein 1 like
FKBP11	FKBP prolyl isomerase 11
FKBP14	FKBP prolyl isomerase 14
FKBP1A	FKBP prolyl isomerase 1A
FKBP9P1	FKBP prolyl isomerase 9 pseudogene 1
FLNA	filamin A
FLNB	filamin B
FLNC	filamin C
FMN1	formin 1
FMNL3	formin like 3
FMNL1	formin like 1
FNTB	farnesyltransferase, CAAX box, beta
FNDC3B	fibronectin type III domain containing 3B
FOSL1	FOS like 1, AP-1 transcription factor subunit
FOSB	FosB proto-oncogene, AP-1 transcription factor subunit
FRAS1	Fraser extracellular matrix complex subunit 1
FOSL2	FOS like 2, AP-1 transcription factor subunit
FREM2	FRAS1 related extracellular matrix 2
FREM1	FRAS1 related extracellular matrix 1
FRMD8	FERM domain containing 8
FRMD4B	FERM domain containing 4B
FRY	FRY microtubule binding protein
FRRS1L	ferric chelate reductase 1 like
FSCN2	fascin actin-bundling protein 2, retinal
FRYL	FRY like transcription coactivator
HIPK2	homeodomain interacting protein kinase 2
HIPK1	homeodomain interacting protein kinase 1
HIF1A	hypoxia inducible factor 1 subunit alpha
HERC3	HECT and RLD domain containing E3 ubiquitin protein ligase 3
HCN2	hyperpolarization activated cyclic nucleotide gated potassium and sodium channel 2
HCFC2	host cell factor C2
HBQ1	hemoglobin subunit theta 1
HBEGF	heparin binding EGF like growth factor
HAS2	hyaluronan synthase 2
HAPLN4	hyaluronan and proteoglycan link protein 4
HAP1	huntingtin associated protein 1
H19	H19 imprinted maternally expressed transcript
LARGE2	LARGE xylosyl- and glucuronyltransferase 2
GXYLT2	glucoside xylosyltransferase 2
GTF2H4	general transcription factor IIH subunit 4
GSN	gelsolin
HRCT1	histidine rich carboxyl terminus 1
HRH1	histamine receptor H1
HR	HR lysine demethylase and nuclear receptor corepressor
PLAAT1	phospholipase A and acyltransferase 1
HPCAL4	hippocalcin like 4
HPSE	heparanase
HOMER1	homer scaffold protein 1
HOMER2	homer scaffold protein 2
HMGCS1	3-hydroxy-3-methylglutaryl-CoA synthase 1
HNF4G	hepatocyte nuclear factor 4 gamma
HMGA2	high mobility group AT-hook 2
HMGCR	3-hydroxy-3-methylglutaryl-CoA reductase
HIVEP3	HIVEP zinc finger 3
HK2	hexokinase 2
HIPK3	homeodomain interacting protein kinase 3
HIVEP2	HIVEP zinc finger 2
GPD2	glycerol-3-phosphate dehydrogenase 2
GOLIM4	golgi integral membrane protein 4
ADGRA2	adhesion G protein-coupled receptor A2
GPR12	G protein-coupled receptor 12
GNG7	G protein subunit gamma 7
GNG12	G protein subunit gamma 12
GNL3LP1	G protein nucleolar 3 like pseudogene 1
GNL1	G protein nucleolar 1 (putative)
GLIS2	GLIS family zinc finger 2
GLIPR1	GLI pathogenesis related 1
GLS	glutaminase
GLIS3	GLIS family zinc finger 3
GJB2	gap junction protein beta 2
GJB1	gap junction protein beta 1
GLCE	glucuronic acid epimerase
GK5	glycerol kinase 5
GRIK3	glutamate ionotropic receptor kainate type subunit 3
GRIK4	glutamate ionotropic receptor kainate type subunit 4
GRIN2B	glutamate ionotropic receptor NMDA type subunit 2B
GRIN2D	glutamate ionotropic receptor NMDA type subunit 2D
GPR62	G protein-coupled receptor 62
GPR75	G protein-coupled receptor 75
GRIA2	glutamate ionotropic receptor AMPA type subunit 2
GRIA3	glutamate ionotropic receptor AMPA type subunit 3
GPR157	G protein-coupled receptor 157
GPR158	G protein-coupled receptor 158
GPR180	G protein-coupled receptor 180
GPR3	G protein-coupled receptor 3
GPR135	G protein-coupled receptor 135
GPR139	G protein-coupled receptor 139
GPR153	G protein-coupled receptor 153
GPR155	G protein-coupled receptor 155
INPP5F	inositol polyphosphate-5-phosphatase F
INPP5D	inositol polyphosphate-5-phosphatase D
INPP4B	inositol polyphosphate-4-phosphatase type II B
INPP1	inositol polyphosphate-1-phosphatase
IQCD	IQ motif containing D
IPPK	inositol-pentakisphosphate 2-kinase
IPCEF1	interaction protein for cytohesin exchange factors 1
INSIG1	insulin induced gene 1
IL4R	interleukin 4 receptor
IL32	interleukin 32
IL27RA	interleukin 27 receptor subunit alpha
IL1RAP	interleukin 1 receptor accessory protein
INHBE	inhibin subunit beta E
INHA	inhibin subunit alpha
ILDR2	immunoglobulin like domain containing receptor 2
IL6R	interleukin 6 receptor
ITGA3	integrin subunit alpha 3
ITGA6	integrin subunit alpha 6
ISYNA1	inositol-3-phosphate synthase 1
ITGA2	integrin subunit alpha 2
ITGB1BP2	integrin subunit beta 1 binding protein 2
ITGB8	integrin subunit beta 8
ITGA7	integrin subunit alpha 7
ITGAV	integrin subunit alpha V
IQGAP2	IQ motif containing GTPase activating protein 2
IQSEC2	IQ motif and Sec7 domain ArfGEF 2
IQCH	IQ motif containing H
IQGAP1	IQ motif containing GTPase activating protein 1
IRS1	insulin receptor substrate 1
CRPPA	CDP-L-ribitol pyrophosphorylase A
IRAK2	interleukin 1 receptor associated kinase 2
IRF1	interferon regulatory factor 1
HSPG2	heparan sulfate proteoglycan 2
HSPB3	heat shock protein family B (small) member 3
HYAL3	hyaluronidase 3
HVCN1	hydrogen voltage gated channel 1
ICAM5	intercellular adhesion molecule 5
ICAM1	intercellular adhesion molecule 1
IDH3A	isocitrate dehydrogenase (NAD(+)) 3 catalytic subunit alpha
ICOSLG/LOC102723996	inducible T cell costimulator ligand
HS3ST3B1	heparan sulfate-glucosamine 3-sulfotransferase 3B1
HS3ST3A1	heparan sulfate-glucosamine 3-sulfotransferase 3A1
HSD17B3	hydroxysteroid 17-beta dehydrogenase 3
HSD17B12	hydroxysteroid 17-beta dehydrogenase 12
HSPA4L	heat shock protein family A (Hsp70) member 4 like
HSD17B7	hydroxysteroid 17-beta dehydrogenase 7
HSPA7	heat shock protein family A (Hsp70) member 7
HSPA6	heat shock protein family A (Hsp70) member 6
IGFBP1	insulin like growth factor binding protein 1
IGFBP7-AS1	IGFBP7 antisense RNA 1
IGLON5	IgLON family member 5
IGSF5	immunoglobulin superfamily member 5
IGSF9B	immunoglobulin superfamily member 9B
IL11	interleukin 11
IL15RA	interleukin 15 receptor subunit alpha
IL18BP	interleukin 18 binding protein
IDI1	isopentenyl-diphosphate delta isomerase 1
IDO1	indoleamine 2,3-dioxygenase 1
IDS	iduronate 2-sulfatase
IFITM10	interferon induced transmembrane protein 10
IFNB1	interferon beta 1
IFNGR2	interferon gamma receptor 2
IFNL1	interferon lambda 1
IFNL2	interferon lambda 2
KIRREL2	kirre like nephrin family adhesion molecule 2
KIFC3	kinesin family member C3
KLF5	Kruppel like factor 5
KITLG	KIT ligand
KIF17	kinesin family member 17
KIF14	kinesin family member 14
KIF21B	kinesin family member 21B
KIF20B	kinesin family member 20B
KPNA1	karyopherin subunit alpha 1
KMT2D	lysine methyltransferase 2D
KRT17	keratin 17
KRR1	KRR1 small subunit processome component homolog
KLHL32	kelch like family member 32
KLHL29	kelch like family member 29
KMT2A	lysine methyltransferase 2A
KLHL42	kelch like family member 42
RUBCNL	rubicon like autophagy enhancer
KIAA0513	KIAA0513
KIAA0754	KIAA0754
ICE1	interactor of little elongation complex ELL subunit 1
KCNQ5	potassium voltage-gated channel subfamily Q member 5
KCTD9	potassium channel tetramerization domain containing 9
KDELR3	KDEL endoplasmic reticulum protein retention receptor 3
KIAA0040	KIAA0040
KIAA1549L	KIAA1549 like
KIAA1671	KIAA1671
KIAA1755	KIAA1755
NEXMIF	neurite extension and migration factor
CEMIP	cell migration inducing hyaluronidase 1
KIAA1211L	KIAA1211 like
FAM234B	family with sequence similarity 234 member B
KIAA1522	KIAA1522
KCNJ5	potassium inwardly rectifying channel subfamily J member 5
KCNJ4	potassium inwardly rectifying channel subfamily J member 4
KCNJ2	potassium inwardly rectifying channel subfamily J member 2
KCNIP1	potassium voltage-gated channel interacting protein 1
KCNH4	potassium voltage-gated channel subfamily H member 4
KCNF1	potassium voltage-gated channel modifier subfamily F member 1
KCND3	potassium voltage-gated channel subfamily D member 3
KCNC4	potassium voltage-gated channel subfamily C member 4
KCNN4	potassium calcium-activated channel subfamily N member 4
KCNN3	potassium calcium-activated channel subfamily N member 3
KCNN2	potassium calcium-activated channel subfamily N member 2
KCNK7	potassium two pore domain channel subfamily K member 7
KCNK5	potassium two pore domain channel subfamily K member 5
KCNK15	potassium two pore domain channel subfamily K member 15
KCNK13	potassium two pore domain channel subfamily K member 13
KCNK10	potassium two pore domain channel subfamily K member 10
JAK2	Janus kinase 2
JPH1	junctophilin 1
JAG1	jagged canonical Notch ligand 1
JAG2	jagged canonical Notch ligand 2
ITPR1	inositol 1,4,5-trisphosphate receptor type 1
ITPRIPL2	ITPRIP like 2
ITK	IL2 inducible T cell kinase
ITPKC	inositol-trisphosphate 3-kinase C
KCNA2	potassium voltage-gated channel subfamily A member 2
KCNC3	potassium voltage-gated channel subfamily C member 3
KBTBD8	kelch repeat and BTB domain containing 8
JUN	Jun proto-oncogene, AP-1 transcription factor subunit
KAZALD1	Kazal type serine peptidase inhibitor domain 1
JPH3	junctophilin 3
JPH4	junctophilin 4
LNX1	ligand of numb-protein X 1
LMTK3	lemur tyrosine kinase 3
LONRF3	LON peptidase N-terminal domain and ring finger 3
LONRF2	LON peptidase N-terminal domain and ring finger 2
LOXL2	lysyl oxidase like 2
LOXL1-AS1	LOXL1 antisense RNA 1
LPCAT2	lysophosphatidylcholine acyltransferase 2
LOXL4	lysyl oxidase like 4
ADGRL2	adhesion G protein-coupled receptor L2
LPCAT4	lysophosphatidylcholine acyltransferase 4
LPP	LIM domain containing preferred translocation partner in lipoma
LPL	lipoprotein lipase
LRP8	LDL receptor related protein 8
LRRC4	leucine rich repeat containing 4
LRRC10B	leucine rich repeat containing 10B
LINC00391	long intergenic non-protein coding RNA 391
LINC00473	long intergenic non-protein coding RNA 473
LINC00630	long intergenic non-protein coding RNA 630
LINC00641	long intergenic non-protein coding RNA 641
LINC00707	long intergenic non-protein coding RNA 707
LINC00941	long intergenic non-protein coding RNA 941
SPAAR	small regulatory polypeptide of amino acid response
LINC00963	long intergenic non-protein coding RNA 963
INAFM2	InaF motif containing 2
PURPL	p53 upregulated regulator of p53 levels
LIPA	lipase A, lysosomal acid type
LIPG	lipase G, endothelial type
LMBR1	limb development membrane protein 1
LMNA	lamin A/C
LGI2	leucine rich repeat LGI family member 2
LGI1	leucine rich glioma inactivated 1
LGALS3	galectin 3
P3H2	prolyl 3-hydroxylase 2
LHX4	LIM homeobox 4
LHFPL2	LHFPL tetraspan subfamily member 2
LGR6	leucine rich repeat containing G protein-coupled receptor 6
LGI3	leucine rich repeat LGI family member 3
LIN7A	lin-7 homolog A, crumbs cell polarity complex component
LIMS1	LIM zinc finger domain containing 1
LIMK1	LIM domain kinase 1
LIF	LIF interleukin 6 family cytokine
LINC00326	long intergenic non-protein coding RNA 326
LINC00189	long intergenic non-protein coding RNA 189
CYTOR	cytoskeleton regulator RNA
LINC00106	long intergenic non-protein coding RNA 106
L1CAM	L1 cell adhesion molecule
LAMA2	laminin subunit alpha 2
KRT7	keratin 7
KRT80	keratin 80
LARP1B	La ribonucleoprotein domain family member 1B
LAT2	linker for activation of T cells family member 2
LAMA4	laminin subunit alpha 4
LAMC1	laminin subunit gamma 1
LCA5	lebercilin LCA5
LCTL	lactase like
LATS2	large tumor suppressor kinase 2
LBH	LBH regulator of WNT signaling pathway
LDLR	low density lipoprotein receptor
LEMD1	LEM domain containing 1
LDHA	lactate dehydrogenase A
LDHAP4	lactate dehydrogenase A pseudogene 4
MIR4435-2HG	MIR4435-2 host gene
MIR503HG	MIR503 host gene
MKI67	marker of proliferation Ki-67
MRTFB	myocardin related transcription factor B
MIR210HG	MIR210 host gene
MIR22HG	MIR22 host gene
mir-24	microRNA 24-1
MIR4292	microRNA 4292
SLC49A3	solute carrier family 49 member 3
MGRN1	mahogunin ring finger 1
MIAT	myocardial infarction associated transcript
MICALL2	MICAL like 2
METRNL	meteorin like, glial cell differentiation regulator
METTL7B	methyltransferase like 7B
MFSD2A	major facilitator superfamily domain containing 2A
MFSD6	major facilitator superfamily domain containing 6
MED29	mediator complex subunit 29
MED12L	mediator complex subunit 12L
MEF2C	myocyte enhancer factor 2C
MEF2B	myocyte enhancer factor 2B
MCM8	minichromosome maintenance 8 homologous recombination repair factor
MCHR1	melanin concentrating hormone receptor 1
ME1	malic enzyme 1
MDGA1	MAM domain containing glycosylphosphatidylinositol anchor 1
MAPKAPK3	MAPK activated protein kinase 3
MAPK11	mitogen-activated protein kinase 11
MCC	MCC regulator of WNT signaling pathway
MAPRE2	microtubule associated protein RP/EB family member 2
MAP3K7CL	MAP3K7 C-terminal like
MAP3K6	mitogen-activated protein kinase kinase kinase 6
MAP6D1	MAP6 domain containing 1
MAP3K9	mitogen-activated protein kinase kinase kinase 9
MAP3K1	mitogen-activated protein kinase kinase kinase 1
MAP3K14	mitogen-activated protein kinase kinase kinase 14
MAP2K1	mitogen-activated protein kinase kinase 1
MAP2K3	mitogen-activated protein kinase kinase 3
MAOB	monoamine oxidase B
MAP1B	microtubule associated protein 1B
MAN1C1	mannosidase alpha class 1C member 1
MAOA	monoamine oxidase A
MAMLD1	mastermind like domain containing 1
MAN1A1	mannosidase alpha class 1A member 1
MALT1	MALT1 paracaspase
MAML2	mastermind like transcriptional coactivator 2
MAEL	maelstrom spermatogenic transposon silencer
MAFF	MAF bZIP transcription factor F
LZTS1	leucine zipper tumor suppressor 1
MAATS1	MYCBP associated and testis expressed 1
LYST	lysosomal trafficking regulator
LYPD1	LY6/PLAUR domain containing 1
LYNX1	Ly6/neurotoxin 1
LYAR	Ly1 antibody reactive
LY96	lymphocyte antigen 96
LURAP1	leucine rich adaptor protein 1
LUCAT1	lung cancer associated transcript 1
LTBP1	latent transforming growth factor beta binding protein 1
LSP1	lymphocyte specific protein 1
LSM12P1	LSM12 pseudogene 1
LSM10	LSM10, U7 small nuclear RNA associated
LRRK1	leucine rich repeat kinase 1
LRRC8C	leucine rich repeat containing 8 VRAC subunit C
LRRC73	leucine rich repeat containing 73
LRRC53	leucine rich repeat containing 53
DRC3	dynein regulatory complex subunit 3
NFATC1	nuclear factor of activated T cells 1
NFATC2	nuclear factor of activated T cells 2
NFIL3	nuclear factor, interleukin 3 regulated
NGEF	neuronal guanine nucleotide exchange factor
NGFR	nerve growth factor receptor
NHLRC2	NHL repeat containing 2
NID1	nidogen 1
NID2	nidogen 2
NEB	nebulin
NEDD4	NEDD4 E3 ubiquitin protein ligase
NEDD9	neural precursor cell expressed, developmentally down-regulated 9
NEK3	NIMA related kinase 3
NEK6	NIMA related kinase 6
NES	nestin
NEURL1	neuralized E3 ubiquitin protein ligase 1
NFAT5	nuclear factor of activated T cells 5
NAV2	neuron navigator 2
NAV1	neuron navigator 1
NBEAL2	neurobeachin like 2
NBEAL1	neurobeachin like 1
NCOA7	nuclear receptor coactivator 7
NCEH1	neutral cholesterol ester hydrolase 1
NDRG1	N-myc downstream regulated 1
NCR3LG1	natural killer cell cytotoxicity receptor 3 ligand 1
MYRF	myelin regulatory factor
MYPN	myopalladin
N4BP3	NEDD4 binding protein 3
N4BP1	NEDD4 binding protein 1
NAA25	N(alpha)-acetyltransferase 25, NatB auxiliary subunit
NAA15	N(alpha)-acetyltransferase 15, NatA auxiliary subunit
NAP1L3	nucleosome assembly protein 1 like 3
NACC2	NACC family member 2
MYO16	myosin XVI
MYO1E	myosin IE
MYLK	myosin light chain kinase
MYLK4	myosin light chain kinase family member 4
MYO7A	myosin VIIA
MYOF	myoferlin
MYO5A	myosin VA
MYO5B	myosin VB
MUC20	mucin 20, cell surface associated
MYADM	myeloid associated differentiation marker
MTHFD1L	methylenetetrahydrofolate dehydrogenase (NADP+ dependent) 1 like
MTX3	metaxin 3
MYH9	myosin heavy chain 9
MYL12A	myosin light chain 12A
MYBPC2	myosin binding protein C, fast type
MYD88	MYD88 innate immune signal transduction adaptor
MRPS17	mitochondrial ribosomal protein S17
MREG	melanoregulin
MRAP2	melanocortin 2 receptor accessory protein 2
MPZL1	myelin protein zero like 1
MT3	metallothionein 3
MSMO1	methylsterol monooxygenase 1
MSANTD4	Myb/SANT DNA binding domain containing 4 with coiled-coils
MRPS31P5	mitochondrial ribosomal protein S31 pseudogene 5
MMP17	matrix metallopeptidase 17
MMP16	matrix metallopeptidase 16
MKLN1	muskelin 1
MPV17L	MPV17 mitochondrial inner membrane protein like
MPC1	mitochondrial pyruvate carrier 1
MOCOS	molybdenum cofactor sulfurase
MMP25	matrix metallopeptidase 25
PCYT2	phosphate cytidylyltransferase 2, ethanolamine
PDCL3P5	PDCL3 pseudogene 5
PDE2A	phosphodiesterase 2A
PDE3A	phosphodiesterase 3A
PCDHGC4	protocadherin gamma subfamily C, 4
PCDHGC5	protocadherin gamma subfamily C, 5
PCNX1	pecanex 1
PCNX2	pecanex 2
PCDHGA9	protocadherin gamma subfamily A, 9
PCDHGB1	protocadherin gamma subfamily B, 1
PCDHGB4	protocadherin gamma subfamily B, 4
PCDHGC3	protocadherin gamma subfamily C, 3
PCDH19	protocadherin 19
PCDH7	protocadherin 7
PCDH9	protocadherin 9
PCDHGA6	protocadherin gamma subfamily A, 6
PEG10	paternally expressed 10
PDZD7	PDZ domain containing 7
PER2	period circadian regulator 2
PER1	period circadian regulator 1
PDLIM7	PDZ and LIM domain 7
PDLIM4	PDZ and LIM domain 4
PDZD4	PDZ domain containing 4
PDP1	pyruvate dehyrogenase phosphatase catalytic subunit 1
PDGFRA	platelet derived growth factor receptor alpha
PDGFB	platelet derived growth factor subunit B
PDLIM3	PDZ and LIM domain 3
PDK1	pyruvate dehydrogenase kinase 1
PDE8B	phosphodiesterase 8B
PDE4A	phosphodiesterase 4A
PDGFA	platelet derived growth factor subunit A
PDE9A	phosphodiesterase 9A
PIEZO1	piezo type mechanosensitive ion channel component 1
PIK3CD	phosphatidylinositol-4,5-bisphosphate 3-kinase catalytic subunit delta
PHTF2	putative homeodomain transcription factor 2
PHYHIP	phytanoyl-CoA 2-hydroxylase interacting protein
PHLDB1	pleckstrin homology like domain family B member 1
PHLPP2	PH domain and leucine rich repeat protein phosphatase 2
PHLDA2	pleckstrin homology like domain family A member 2
PHLDA3	pleckstrin homology like domain family A member 3
PHEX	phosphate regulating endopeptidase homolog X-linked
PHLDA1	pleckstrin homology like domain family A member 1
PGAM1P7	phosphoglycerate mutase 1 pseudogene 7
PGM2L1	phosphoglucomutase 2 like 1
PFKP	phosphofructokinase, platelet
PFN1P6	profilin 1 pseudogene 6
PFKFB3	6-phosphofructo-2-kinase/fructose-2,6-biphosphatase 3
PFKFB4	6-phosphofructo-2-kinase/fructose-2,6-biphosphatase 4
PLEKHG1	pleckstrin homology and RhoGEF domain containing G1
PLD1	phospholipase D1
PLCXD2	phosphatidylinositol specific phospholipase C X domain containing 2
PLCE1	phospholipase C epsilon 1
PLCD3	phospholipase C delta 3
PLCB1	phospholipase C beta 1
PLBD1	phospholipase B domain containing 1
PLAU	plasminogen activator, urokinase
PLAT	plasminogen activator, tissue type
PLA2G3	phospholipase A2 group III
PKDCC	protein kinase domain containing, cytoplasmic
PITPNM3	PITPNM family member 3
PITPNM2	phosphatidylinositol transfer protein membrane associated 2
PIR	pirin
PIPOX	pipecolic acid and sarcosine oxidase
PIM2	Pim-2 proto-oncogene, serine/threonine kinase
NMNAT2	nicotinamide nucleotide adenylyltransferase 2
NOS2	nitric oxide synthase 2
NOTUM	notum, palmitoleoyl-protein carboxylesterase
NPAS1	neuronal PAS domain protein 1
NPAS2	neuronal PAS domain protein 2
NPR1	natriuretic peptide receptor 1
NPR2	natriuretic peptide receptor 2
NPTX1	neuronal pentraxin 1
NIPA1	NIPA magnesium transporter 1
NIPAL2	NIPA like domain containing 2
NKAIN3	sodium/potassium transporting ATPase interacting 3
NKD2	NKD inhibitor of WNT signaling pathway 2
NKPD1	NTPase KAP family P-loop domain containing 1
NKTR	natural killer cell triggering receptor
NLGN3	neuroligin 3
NLGN4Y	neuroligin 4 Y-linked
NSDHL	NAD(P) dependent steroid dehydrogenase-like
NRROS	negative regulator of reactive oxygen species
NSUN7	NOP2/Sun RNA methyltransferase family member 7
NSFP1	N-ethylmaleimide-sensitive factor pseudogene 1
NUFIP2	nuclear FMR1 interacting protein 2
NUDT16L1	nudix hydrolase 16 like 1
NUTM2D	NUT family member 2D
NUMBL	NUMB like endocytic adaptor protein
NQO2	N-ribosyldihydronicotinamide:quinone reductase 2
NQO1	NAD(P)H quinone dehydrogenase 1
NRCAM	neuronal cell adhesion molecule
NR4A3	nuclear receptor subfamily 4 group A member 3
NRGN	neurogranin
NRF1	nuclear respiratory factor 1
NRP2	neuropilin 2
NRIP3	nuclear receptor interacting protein 3
OPN1SW	opsin 1, short wave sensitive
OSBP2	oxysterol binding protein 2
OLFM2	olfactomedin 2
ONECUT2	one cut homeobox 2
OSMR	oncostatin M receptor
OTUD4	OTU deubiquitinase 4
OSBPL3	oxysterol binding protein like 3
OSGIN1	oxidative stress induced growth inhibitor 1
NXPH4	neurexophilin 4
OBSCN	obscurin, cytoskeletal calmodulin and titin-interacting RhoGEF
NXPE3	neurexophilin and PC-esterase domain family member 3
NXPH3	neurexophilin 3
OGDHL	oxoglutarate dehydrogenase like
OGFRL1	opioid growth factor receptor like 1
OCIAD2	OCIA domain containing 2
ODF2	outer dense fiber of sperm tails 2
PANX2	pannexin 2
PANK3	pantothenate kinase 3
PALM3	paralemmin 3
PALM2AKAP2*	PALM2 and AKAP2 fusion
PCDH12	protocadherin 12
PCDH10	protocadherin 10
PCDH1	protocadherin 1
PARVB	parvin beta
OXTR	oxytocin receptor
OXCT2P1	3-oxoacid CoA-transferase 2 pseudogene 1
OXCT2	3-oxoacid CoA-transferase 2
OVGP1	oviductal glycoprotein 1
PALM2AKAP2*	PALM2 and AKAP2 fusion
PALLD	palladin, cytoskeletal associated protein
P4HA2	prolyl 4-hydroxylase subunit alpha 2
P2RX5	purinergic receptor P2X 5
PXN	paxillin
NECTIN1	nectin cell adhesion molecule 1
RAB23	RAB23, member RAS oncogene family
RAB20	RAB20, member RAS oncogene family
PTPRZ1	protein tyrosine phosphatase receptor type Z1
PTPRU	protein tyrosine phosphatase receptor type U
PVR	PVR cell adhesion molecule
CAVIN1	caveolae associated protein 1
RAB43P1	RAB43 pseudogene 1
RAB43	RAB43, member RAS oncogene family
RALGAPB	Ral GTPase activating protein non-catalytic beta subunit
RALB	RAS like proto-oncogene B
RAB27B	RAB27B, member RAS oncogene family
RAB26	RAB26, member RAS oncogene family
RAB3A	RAB3A, member RAS oncogene family
RAB39A	RAB39A, member RAS oncogene family
RASAL1	RAS protein activator like 1
RASIP1	Ras interacting protein 1
RASL12	RAS like family 12
RASSF5	Ras association domain family member 5
RAPGEF3	Rap guanine nucleotide exchange factor 3
RAPGEF4	Rap guanine nucleotide exchange factor 4
RAPH1	Ras association (RalGDS/AF-6) and pleckstrin homology domains 1
RARG	retinoic acid receptor gamma
RBM3	RNA binding motif protein 3
RBM33	RNA binding motif protein 33
RBM47	RNA binding motif protein 47
RCOR1	REST corepressor 1
RASSF8	Ras association domain family member 8
RASSF8-AS1	RASSF8 antisense RNA 1
RBM15	RNA binding motif protein 15
RBM20	RNA binding motif protein 20
RGS17	regulator of G protein signaling 17
RGS14	regulator of G protein signaling 14
RFFL	ring finger and FYVE like domain containing E3 ubiquitin protein ligase
RELT	RELT TNF receptor
REL	REL proto-oncogene, NF-kB subunit
REEP6	receptor accessory protein 6
RDH5	retinol dehydrogenase 5
RDH10	retinol dehydrogenase 10
RHOQP2	ras homolog family member Q pseudogene 2
RHOJ	ras homolog family member J
RHOC	ras homolog family member C
RHBDL1	rhomboid like 1
RHBDF2	rhomboid 5 homolog 2
RHBDF1	rhomboid 5 homolog 1
RGS6	regulator of G protein signaling 6
RGS20	regulator of G protein signaling 20
RN7SKP275	RN7SK pseudogene 275
RNF150	ring finger protein 150
RINL	Ras and Rab interactor like
RIPPLY3	ripply transcriptional repressor 3
RIMS2	regulating synaptic membrane exocytosis 2
RIN1	Ras and Rab interactor 1
RIC3	RIC3 acetylcholine receptor chaperone
RIMBP2	RIMS binding protein 2
ROCK2	Rho associated coiled-coil containing protein kinase 2
RNF207	ring finger protein 207
RNMT	RNA guanine-7 methyltransferase
RNF180	ring finger protein 180
RNF19A	ring finger protein 19A, RBR E3 ubiquitin protein ligase
PLEKHG5	pleckstrin homology and RhoGEF domain containing G5
PLEKHG2	pleckstrin homology and RhoGEF domain containing G2
PLEKHS1	pleckstrin homology domain containing S1
PLEKHH2	pleckstrin homology, MyTH4 and FERM domain containing H2
PLOD2	procollagen-lysine,2-oxoglutarate 5-dioxygenase 2
PLK3	polo like kinase 3
PMAIP1	phorbol-12-myristate-13-acetate-induced protein 1
PLXND1	plexin D1
PMP22	peripheral myelin protein 22
PMM2	phosphomannomutase 2
PODNL1	podocan like 1
PNMA2	PNMA family member 2
POLR3G	RNA polymerase III subunit G
POLQ	DNA polymerase theta
POMK	protein O-mannose kinase
POM121B	POM121 transmembrane nucleoporin B (pseudogene)
PLPP2	phospholipid phosphatase 2
PPARGC1B	PPARG coactivator 1 beta
PPFIA4	PTPRF interacting protein alpha 4
PPL	periplakin
PPM1E	protein phosphatase, Mg2+/Mn2+ dependent 1E
PPM1J	protein phosphatase, Mg2+/Mn2+ dependent 1J
PPME1	protein phosphatase methylesterase 1
PPP1R14C	protein phosphatase 1 regulatory inhibitor subunit 14C
PPP1R15A	protein phosphatase 1 regulatory subunit 15A
PPP1R3B	protein phosphatase 1 regulatory subunit 3B
PPP1R3G	protein phosphatase 1 regulatory subunit 3G
PPP2R3A	protein phosphatase 2 regulatory subunit B''alpha
PREX1	phosphatidylinositol-3,4,5-trisphosphate dependent Rac exchange factor 1
PRIMA1	proline rich membrane anchor 1
PRKAA2	protein kinase AMP-activated catalytic subunit alpha 2
PRKAR1B	protein kinase cAMP-dependent type I regulatory subunit beta
PROS1	protein S
PRKXP1	PRKX pseudogene 1
PRKDC	protein kinase, DNA-activated, catalytic subunit
PRKCD	protein kinase C delta
PRR5	proline rich 5
INAFM1	InaF motif containing 1
PRR18	proline rich 18
PRPS2	phosphoribosyl pyrophosphate synthetase 2
PRUNE2	prune homolog 2 with BCH domain
PRSS23	serine protease 23
PRRX2	paired related homeobox 2
PRRC2C	proline rich coiled-coil 2C
PSORS1C1	psoriasis susceptibility 1 candidate 1
PSME4	proteasome activator subunit 4
PSMD12	proteasome 26S subunit, non-ATPase 12
PRX	periaxin
PTCHD1	patched domain containing 1
PTCHD4	patched domain containing 4
PSTPIP2	proline-serine-threonine phosphatase interacting protein 2
PTCD2	pentatricopeptide repeat domain 2
PTHLH	parathyroid hormone like hormone
PTK2B	protein tyrosine kinase 2 beta
PTER	phosphotriesterase related
PTGIS	prostaglandin I2 synthase
PTPN14	protein tyrosine phosphatase non-receptor type 14
PTPRE	protein tyrosine phosphatase receptor type E
PTP4A3	protein tyrosine phosphatase 4A3
PTPDC1	protein tyrosine phosphatase domain containing 1
PTPRN	protein tyrosine phosphatase receptor type N
PTPRO	protein tyrosine phosphatase receptor type O
PTPRG	protein tyrosine phosphatase receptor type G
PTPRH	protein tyrosine phosphatase receptor type H
RPL23AP53	ribosomal protein L23a pseudogene 53
RPL23AP4	ribosomal protein L23a pseudogene 4
RPE65	retinoid isomerohydrolase RPE65
RPAP3	RNA polymerase II associated protein 3
RP1L1	RP1 like 1
SCARF2	scavenger receptor class F member 2
SBF2	SET binding factor 2
SCG2	secretogranin II
SCFD2	sec1 family domain containing 2
S1PR5	sphingosine-1-phosphate receptor 5
S1PR2	sphingosine-1-phosphate receptor 2
SAT1	spermidine/spermine N1-acetyltransferase 1
SAMD9L	sterile alpha motif domain containing 9 like
S100A4	S100 calcium binding protein A4
S100A3	S100 calcium binding protein A3
S100B	S100 calcium binding protein B
S100A6	S100 calcium binding protein A6
S100A13	S100 calcium binding protein A13
S100A11	S100 calcium binding protein A11
S100A2	S100 calcium binding protein A2
S100A16	S100 calcium binding protein A16
RUNX2	RUNX family transcription factor 2
RUNX3	RUNX family transcription factor 3
RYR3	ryanodine receptor 3
S100A10	S100 calcium binding protein A10
RRM2B	ribonucleotide reductase regulatory TP53 inducible subunit M2B
RTN4RL1	reticulon 4 receptor like 1
RTTN	rotatin
RUNX1	RUNX family transcription factor 1
RPS6KA3	ribosomal protein S6 kinase A3
RPS6KB1	ribosomal protein S6 kinase B1
RRAD	RRAD, Ras related glycolysis inhibitor and calcium channel regulator
RRBP1	ribosome binding protein 1
RPP14	ribonuclease P/MRP subunit p14
RPRML	reprimo like
RPS11P5	ribosomal protein S11 pseudogene 5
RPS6KA1	ribosomal protein S6 kinase A1
SLC9A7	solute carrier family 9 member A7
SLCO4A1	solute carrier organic anion transporter family member 4A1
SLC7A5	solute carrier family 7 member 5
SLC9A5	solute carrier family 9 member A5
SLC7A1	solute carrier family 7 member 1
SLC7A11	solute carrier family 7 member 11
SLC5A3	solute carrier family 5 member 3
SLC6A6	solute carrier family 6 member 6
SMOX	spermine oxidase
SMTNL1	smoothelin like 1
SMC5	structural maintenance of chromosomes 5
SMCO4	single-pass membrane protein with coiled-coil domains 4
SLIT1	slit guidance ligand 1
SMAP2	small ArfGAP2
SLFN12L	schlafen family member 12 like
SLFNL1	schlafen like 1
SLC35D3	solute carrier family 35 member D3
SLC35A3	solute carrier family 35 member A3
SLC30A3	solute carrier family 30 member 3
SLC30A1	solute carrier family 30 member 1
SLC2A4RG	SLC2A4 regulator
SLC2A3	solute carrier family 2 member 3
SLC2A14	solute carrier family 2 member 14
SLC29A4	solute carrier family 29 member 4
SLC4A7	solute carrier family 4 member 7
SLC4A3	solute carrier family 4 member 3
SLC4A11	solute carrier family 4 member 11
SLC45A3	solute carrier family 45 member 3
SLC41A2	solute carrier family 41 member 2
SLC39A4	solute carrier family 39 member 4
SLC38A6	solute carrier family 38 member 6
SLC35E4	solute carrier family 35 member E4
SPAG4	sperm associated antigen 4
SPATA2L	spermatogenesis associated 2 like
SPATA6	spermatogenesis associated 6
SPEG	striated muscle enriched protein kinase
SOX18	SRY-box transcription factor 18
SOX7	SRY-box transcription factor 7
SP140L	SP140 nuclear body protein like
SPAG1	sperm associated antigen 1
SPRED1	sprouty related EVH1 domain containing 1
SPRED2	sprouty related EVH1 domain containing 2
SPRED3	sprouty related EVH1 domain containing 3
SPRY1	sprouty RTK signaling antagonist 1
SPHK1	sphingosine kinase 1
SPICE1	spindle and centriole associated protein 1
SPOCD1	SPOC domain containing 1
SPOCK1	SPARC (osteonectin), cwcv and kazal like domains proteoglycan 1
SNRPA1	small nuclear ribonucleoprotein polypeptide A'
SNRPA	small nuclear ribonucleoprotein polypeptide A
SNTB1	syntrophin beta 1
SNTA1	syntrophin alpha 1
SNCB	synuclein beta
SNAI1	snail family transcriptional repressor 1
SNORA77	small nucleolar RNA, H/ACA box 77
SNED1	sushi, nidogen and EGF like domains 1
SOCS6	suppressor of cytokine signaling 6
SOCS4	suppressor of cytokine signaling 4
SOX15	SRY-box transcription factor 15
SORL1	sortilin related receptor 1
SOCS2	suppressor of cytokine signaling 2
SNX10	sorting nexin 10
SOCS3	suppressor of cytokine signaling 3
SOCS2-AS1	SOCS2 antisense RNA 1
SEZ6	seizure related 6 homolog
SEZ6L	seizure related 6 homolog like
SERPINI1	serpin family I member 1
SERTAD1	SERTA domain containing 1
SGMS2	sphingomyelin synthase 2
SFXN3	sideroflexin 3
SH2B3	SH2B adaptor protein 3
SH2D3C	SH2 domain containing 3C
SGPP2	sphingosine-1-phosphate phosphatase 2
SGTB	small glutamine rich tetratricopeptide repeat containing beta
SH3BP5	SH3 domain binding protein 5
SH3D21	SH3 domain containing 21
SH2D5	SH2 domain containing 5
SH3BP1	SH3 domain binding protein 1
SDCBP2	syndecan binding protein 2
SDC4	syndecan 4
SDC3	syndecan 3
SCML1	Scm polycomb group protein like 1
SEC24D	SEC24 homolog D, COPII coat complex component
SEC24A	SEC24 homolog A, COPII coat complex component
SDK2	sidekick cell adhesion molecule 2
SEMA7A	semaphorin 7A (John Milton Hagen blood group)
SEMA4G	semaphorin 4G
SEMA4A	semaphorin 4A
SEMA3A	semaphorin 3A
SERPINE1	serpin family E member 1
SERPINB8	serpin family B member 8
SERPINB1	serpin family B member 1
SENP8	SUMO peptidase family member, NEDD8 specific
SIPA1L2	signal induced proliferation associated 1 like 2
SKA1	spindle and kinetochore associated complex subunit 1
SLC13A5	solute carrier family 13 member 5
SLC16A14	solute carrier family 16 member 14
SLC16A3	solute carrier family 16 member 3
SLC16A4	solute carrier family 16 member 4
SLC18A1	solute carrier family 18 member A1
SLC19A3	solute carrier family 19 member 3
SLC1A1	solute carrier family 1 member 1
SLC22A18	solute carrier family 22 member 18
SLC22A4	solute carrier family 22 member 4
SLC25A15	solute carrier family 25 member 15
SLC25A30	solute carrier family 25 member 30
SLC25A37	solute carrier family 25 member 37
SLC26A6	solute carrier family 26 member 6
SLC27A1	solute carrier family 27 member 1
SH3RF3	SH3 domain containing ring finger 3
SH3RF1	SH3 domain containing ring finger 1
SH3TC1	SH3 domain and tetratricopeptide repeats 1
SH3RF3-AS1	SH3RF3 antisense RNA 1
SHB	SH2 domain containing adaptor protein B
SHANK2	SH3 and multiple ankyrin repeat domains 2
SHC3	SHC adaptor protein 3
SHC1	SHC adaptor protein 1
SHISA3	shisa family member 3
SHC4	SHC adaptor protein 4
SHISA8	shisa family member 8
SHISA7	shisa family member 7
SHROOM3	shroom family member 3
SHROOM2	shroom family member 2
SIPA1L1	signal induced proliferation associated 1 like 1
SIPA1	signal-induced proliferation-associated 1
TNS3	tensin 3
TOMM6	translocase of outer mitochondrial membrane 6
TNR	tenascin R
TNS1	tensin 1
TPM4	tropomyosin 4
TPPP	tubulin polymerization promoting protein
TPBGL	trophoblast glycoprotein like
TPH1	tryptophan hydroxylase 1
TNFRSF1A	TNF receptor superfamily member 1A
TNFRSF1B	TNF receptor superfamily member 1B
TNFRSF12A	TNF receptor superfamily member 12A
TNFRSF18	TNF receptor superfamily member 18
TNFSF13B	TNF superfamily member 13b
TNIK	TRAF2 and NCK interacting kinase
TNFRSF4	TNF receptor superfamily member 4
TNFRSF8	TNF receptor superfamily member 8
TRIM7	tripartite motif containing 7
TRIM44	tripartite motif containing 44
TRIM17	tripartite motif containing 17
TRIB3	tribbles pseudokinase 3
TRNP1	TMF1 regulated nuclear protein 1
TRIO	trio Rho guanine nucleotide exchange factor
TRIM9	tripartite motif containing 9
TRIM71	tripartite motif containing 71
TRAF3IP2	TRAF3 interacting protein 2
TRAF1	TNF receptor associated factor 1
TRAC	T cell receptor alpha constant
TPST2	tyrosylprotein sulfotransferase 2
TRIB2	tribbles pseudokinase 2
TREH	trehalase
TRAM2	translocation associated membrane protein 2
TRAF6	TNF receptor associated factor 6
TLN2	talin 2
TLR4	toll like receptor 4
TM4SF1	transmembrane 4 L six family member 1
TMBIM1	transmembrane BAX inhibitor motif containing 1
TMC6	transmembrane channel like 6
TMCC3	transmembrane and coiled-coil domain family 3
TMEM132E	transmembrane protein 132E
TMEM154	transmembrane protein 154
TH	tyrosine hydroxylase
THBS1	thrombospondin 1
THSD1	thrombospondin type 1 domain containing 1
THY1	Thy-1 cell surface antigen
TIAM2	T cell lymphoma invasion and metastasis 2
TIMP1	TIMP metallopeptidase inhibitor 1
TIMP3	TIMP metallopeptidase inhibitor 3
TLCD2	TLC domain containing 2
TMEM53	transmembrane protein 53
TMEM52	transmembrane protein 52
TMEM87B	transmembrane protein 87B
TMEM67	transmembrane protein 67
TMTC1	transmembrane O-mannosyltransferase targeting cadherins 1
TMPPE	transmembrane protein with metallophosphoesterase domain
TNFRSF10B	TNF receptor superfamily member 10b
TNC	tenascin C
TMEM170B	transmembrane protein 170B
TMEM158	transmembrane protein 158 (gene/pseudogene)
TMEM178A	transmembrane protein 178A
TMEM173	transmembrane protein 173
TMEM217	transmembrane protein 217
TMEM189	transmembrane protein 189
TMEM249	transmembrane protein 249
TMEM231	transmembrane protein 231
TANC2	tetratricopeptide repeat, ankyrin repeat and coiled-coil containing 2
TATDN2P2	TatD DNase domain containing 2 pseudogene 2
TACC2	transforming acidic coiled-coil containing protein 2
TAGLN	transgelin
SYTL5	synaptotagmin like 5
TACC1	transforming acidic coiled-coil containing protein 1
SYT12	synaptotagmin 12
SYT7	synaptotagmin 7
SYNPO	synaptopodin
SYNPR	synaptoporin
SYNJ2	synaptojanin 2
SYNM	synemin
SYNGR1	synaptogyrin 1
SYNGR3	synaptogyrin 3
SYN3	synapsin III
SYNE3	spectrin repeat containing nuclear envelope family member 3
TGM2	transglutaminase 2
TGFBR3L	transforming growth factor beta receptor 3 like
TFRC	transferrin receptor
TFR2	transferrin receptor 2
TFPI2	tissue factor pathway inhibitor 2
TFEB	transcription factor EB
TFB1M	transcription factor B1, mitochondrial
TFAP2E	transcription factor AP-2 epsilon
TERT	telomerase reverse transcriptase
TEAD3	TEA domain transcription factor 3
TEAD1	TEA domain transcription factor 1
TDG	thymine DNA glycosylase
TCF7	transcription factor 7
TCF19	transcription factor 19
TBX21	T-box transcription factor 21
TBC1D8B	TBC1 domain family member 8B
SSTR3	somatostatin receptor 3
ST3GAL1	ST3 beta-galactoside alpha-2,3-sialyltransferase 1
ST6GAL1	ST6 beta-galactoside alpha-2,6-sialyltransferase 1
ST6GALNAC4	ST6 N-acetylgalactosaminide alpha-2,6-sialyltransferase 4
SRXN1	sulfiredoxin 1
SSC5D	scavenger receptor cysteine rich family member with 5 domains
SSH1	slingshot protein phosphatase 1
SSR1	signal sequence receptor subunit 1
SSC4D	scavenger receptor cysteine rich family member with 4 domains
SRPX2	sushi repeat containing protein X-linked 2
SRRM5	serine/arginine repetitive matrix 5
SRSF12	serine and arginine rich splicing factor 12
SPRY2	sprouty RTK signaling antagonist 2
SPRY4	sprouty RTK signaling antagonist 4
SPSB1	splA/ryanodine receptor domain and SOCS box containing 1
SPTSSB	serine palmitoyltransferase small subunit B
SVIL	supervillin
SUDS3P1	SDS3 homolog, SIN3A corepressor complex component pseudogene 1
SYDE2	synapse defective Rho GTPase homolog 2
SYBU	syntabulin
STK4	serine/threonine kinase 4
STK32B	serine/threonine kinase 32B
STOM	stomatin
STK40	serine/threonine kinase 40
STEAP3	STEAP3 metalloreductase
STC2	stanniocalcin 2
STK17A	serine/threonine kinase 17a
STK10	serine/threonine kinase 10
STAC2	SH3 and cysteine rich domain 2
ST8SIA3	ST8 alpha-N-acetyl-neuraminide alpha-2,8-sialyltransferase 3
STARD9	StAR related lipid transfer domain containing 9
STARD8	StAR related lipid transfer domain containing 8
ZNF483	zinc finger protein 483
ZNF469	zinc finger protein 469
ZNF467	zinc finger protein 467
ZNF460	zinc finger protein 460
ZNF600	zinc finger protein 600
ZNF597	zinc finger protein 597
ZNF583	zinc finger protein 583
ZNF530	zinc finger protein 530
ZNF778	zinc finger protein 778
ZNF699	zinc finger protein 699
ZNF660	zinc finger protein 660
ZNF625	zinc finger protein 625
ZSCAN5A	zinc finger and SCAN domain containing 5A
ZNF827	zinc finger protein 827
ZNF805	zinc finger protein 805
ZNF800	zinc finger protein 800
ZYX	zyxin
WT1	WT1 transcription factor
WNT7B	Wnt family member 7B
WWC2	WW and C2 domain containing 2
WTIP	WT1 interacting protein
XIAP	X-linked inhibitor of apoptosis
WWTR1	WW domain containing transcription regulator 1
XIRP1	xin actin binding repeat containing 1
XYLB	xylulokinase
ZBP1	Z-DNA binding protein 1
ZBED6	zinc finger BED-type containing 6
ZC3HAV1	zinc finger CCCH-type containing, antiviral 1
ZBTB38	zinc finger and BTB domain containing 38
ZCCHC12	zinc finger CCHC-type containing 12
ZC3HAV1L	zinc finger CCCH-type containing, antiviral 1 like
ZDHHC23	zinc finger DHHC-type containing 23
ZFHX3	zinc finger homeobox 3
ZFP36	ZFP36 ring finger protein
ZFPM1	zinc finger protein, FOG family member 1
ZFYVE28	zinc finger FYVE-type containing 28
ZIC4	Zic family member 4
ZMAT3	zinc finger matrin-type 3
ZNF141	zinc finger protein 141
ZNF154	zinc finger protein 154
ZNF221	zinc finger protein 221
ZNF26	zinc finger protein 26
ZNF281	zinc finger protein 281
ZNF317	zinc finger protein 317
ZNF365	zinc finger protein 365
ZNF382	zinc finger protein 382
ZNF398	zinc finger protein 398
VARS	valyl-tRNA synthetase 1
VAC14-AS1	VAC14 antisense RNA 1
UPP1	uridine phosphorylase 1
UNC80	unc-80 homolog, NALCN channel complex subunit
UNC5A	unc-5 netrin receptor A
UNC13A	unc-13 homolog A
ULK4	unc-51 like kinase 4
ULBP3	UL16 binding protein 3
VGLL2	vestigial like family member 2
VGF	VGF nerve growth factor inducible
VEGFA	vascular endothelial growth factor A
VDR	vitamin D receptor
VCL	vinculin
VCAN	versican
VAV3	vav guanine nucleotide exchange factor 3
VASH2	vasohibin 2
VWA5B2	von Willebrand factor A domain containing 5B2
WARS1	tryptophanyl-tRNA synthetase 1
VSTM2L	V-set and transmembrane domain containing 2 like
VWA1	von Willebrand factor A domain containing 1
VPS13A	vacuolar protein sorting 13 homolog A
VRK2	VRK serine/threonine kinase 2
VIPR1	vasoactive intestinal peptide receptor 1
VMO1	vitelline membrane outer layer 1 homolog
WIPF1	WAS/WASL interacting protein family member 1
WDR43	WD repeat domain 43
WHAMMP2	WAS protein homolog associated with actin, golgi membranes and microtubules pseudogene 2
WDR1	WD repeat domain 1
WDR27	WD repeat domain 27
WASH5P	WASP family homolog 5, pseudogene
WDFY2	WD repeat and FYVE domain containing 2
TSPAN17	tetraspanin 17
TSPAN12	tetraspanin 12
TSPY26P	testis specific protein Y-linked 26, pseudogene
TSPAN9	tetraspanin 9
TRPM4	transient receptor potential cation channel subfamily M member 4
TRPM3	transient receptor potential cation channel subfamily M member 3
TSN	translin
TRPM8	transient receptor potential cation channel subfamily M member 8
TTLL10	tubulin tyrosine ligase like 10
TTC9	tetratricopeptide repeat domain 9
TTYH3	tweety family member 3
TTLL11	tubulin tyrosine ligase like 11
TTC24	tetratricopeptide repeat domain 24
TTC13	tetratricopeptide repeat domain 13
TTC39B	tetratricopeptide repeat domain 39B
TTC26	tetratricopeptide repeat domain 26
TUBB6	tubulin beta 6 class V
TUBE1	tubulin epsilon 1
TWF1P1	twinfilin 1 pseudogene 1
TUBA4A	tubulin alpha 4a
TUBA8	tubulin alpha 8
TUBB3	tubulin beta 3 class III
TUBB4A	tubulin beta 4A class IVa
UBR3	ubiquitin protein ligase E3 component n-recognin 3
UBTD1	ubiquitin domain containing 1
UCN2	urocortin 2
UHMK1	U2AF homology motif kinase 1
UBASH3B	ubiquitin associated and SH3 domain containing B
UBE2J1	ubiquitin conjugating enzyme E2 J1
UBE2QL1	ubiquitin conjugating enzyme E2 Q family like 1
UBE3C	ubiquitin protein ligase E3C

## Sheet: Down Regulated Genes
Gene Symbol	Name
RPS8	ribosomal protein S8
EIF2AK4	eukaryotic translation initiation factor 2 alpha kinase 4
AASDHPPT	aminoadipate-semialdehyde dehydrogenase-phosphopantetheinyl transferase
ABCA1	ATP binding cassette subfamily A member 1
ABCC6	ATP binding cassette subfamily C member 6
ABCD2	ATP binding cassette subfamily D member 2
ABHD17AP6	abhydrolase domain containing 17A pseudogene 6
ABHD8	abhydrolase domain containing 8
ABLIM2	actin binding LIM protein family member 2
ABTB1	ankyrin repeat and BTB domain containing 1
ACBD4	acyl-CoA binding domain containing 4
ACVR2A	activin A receptor type 2A
ACVR2B-AS1	ACVR2B antisense RNA 1
ACYP2	acylphosphatase 2
ADAM8	ADAM metallopeptidase domain 8
GCNA	germ cell nuclear acidic peptidase
ACSS1	acyl-CoA synthetase short chain family member 1
ACTA2	actin alpha 2, smooth muscle
ACTC1	actin alpha cardiac muscle 1
ADCYAP1R1	ADCYAP receptor type I
ADI1	acireductone dioxygenase 1
ADPRHL1	ADP-ribosylhydrolase like 1
ADAMTS13	ADAM metallopeptidase with thrombospondin type 1 motif 13
ADAMTS6	ADAM metallopeptidase with thrombospondin type 1 motif 6
ADAMTSL1	ADAMTS like 1
COQ8A	coenzyme Q8A
ALDH4A1	aldehyde dehydrogenase 4 family member A1
AKAP1	A-kinase anchoring protein 1
AGAP5 (includes others)	ArfGAP with GTPase domain, ankyrin repeat and PH domain 5
AKNAD1	AKNA domain containing 1
AKAP3	A-kinase anchoring protein 3
AMH	anti-Mullerian hormone
AMDHD2	amidohydrolase domain containing 2
AMOTL2	angiomotin like 2
AMIGO1	adhesion molecule with Ig like domain 1
ALDH7A1	aldehyde dehydrogenase 7 family member A1
ALDH6A1	aldehyde dehydrogenase 6 family member A1
AMACR	alpha-methylacyl-CoA racemase
ALPK3	alpha kinase 3
ANKFN1	ankyrin repeat and fibronectin type III domain containing 1
ANKRA2	ankyrin repeat family A member 2
ANKAR	ankyrin and armadillo repeat containing
ANKDD1B	ankyrin repeat and death domain containing 1B
ANGPTL1	angiopoietin like 1
ANGPTL6	angiopoietin like 6
AMPH	amphiphysin
ANGEL1	angel homolog 1
ANXA2R	annexin A2 receptor
ANXA9	annexin A9
ANKRD65	ankyrin repeat domain 65
ANO9	anoctamin 9
ANKRD12	ankyrin repeat domain 12
ANKRD24	ankyrin repeat domain 24
APOL2	apolipoprotein L2
APOBEC3G	apolipoprotein B mRNA editing enzyme catalytic subunit 3G
APOBEC3F	apolipoprotein B mRNA editing enzyme catalytic subunit 3F
APOBEC3D	apolipoprotein B mRNA editing enzyme catalytic subunit 3D
APCDD1	APC down-regulated 1
APC2	APC regulator of WNT signaling pathway 2
AP5Z1	adaptor related protein complex 5 subunit zeta 1
ARHGEF19	Rho guanine nucleotide exchange factor 19
ARHGEF10L	Rho guanine nucleotide exchange factor 10 like
ARHGAP9	Rho GTPase activating protein 9
ARHGAP27	Rho GTPase activating protein 27
ARHGAP24	Rho GTPase activating protein 24
ARFGAP1	ADP ribosylation factor GTPase activating protein 1
APOL6	apolipoprotein L6
APOL3	apolipoprotein L3
ARTN	artemin
ART3	ADP-ribosyltransferase 3
ARX	aristaless related homeobox
ARVCF	ARVCF delta catenin family member
ASCL1	achaete-scute family bHLH transcription factor 1
ASB16	ankyrin repeat and SOCS box containing 16
ATCAY	ATCAY kinesin light chain interacting caytaxin
ASXL3	ASXL transcriptional regulator 3
ARHGEF9	Cdc42 guanine nucleotide exchange factor 9
ARHGEF28	Rho guanine nucleotide exchange factor 28
ARIH2OS	ariadne RBR E3 ubiquitin protein ligase 2 opposite strand
ARID3A	AT-rich interaction domain 3A
ARMCX1	armadillo repeat containing X-linked 1
ARMC12	armadillo repeat containing 12
ARSD	arylsulfatase D
ARMCX6	armadillo repeat containing X-linked 6
B3GALT2	beta-1,3-galactosyltransferase 2
BAG1	BCL2 associated athanogene 1
BAZ2B	bromodomain adjacent to zinc finger domain 2B
BBC3	BCL2 binding component 3
BBOX1	gamma-butyrobetaine hydroxylase 1
BBS2	Bardet-Biedl syndrome 2
BBS9	Bardet-Biedl syndrome 9
BCAN	brevican
ATF6B	activating transcription factor 6 beta
ATG9B	autophagy related 9B
ATOH8	atonal bHLH transcription factor 8
ATP1A2	ATPase Na+/K+ transporting subunit alpha 2
ATP2B3	ATPase plasma membrane Ca2+ transporting 3
ATP6AP1L	ATPase H+ transporting accessory protein 1 like
ATP6V0E2-AS1	ATP6V0E2 antisense RNA 1
ATXN7L1	ataxin 7 like 1
BMP7	bone morphogenetic protein 7
BMF	Bcl2 modifying factor
BIRC2	baculoviral IAP repeat containing 2
BHLHE22	basic helix-loop-helix family member e22
BOLA1	bolA family member 1
BMS1P10	BMS1 pseudogene 10
BMPR1B	bone morphogenetic protein receptor type 1B
BMPER	BMP binding endothelial regulator
BCOR	BCL6 corepressor
BCO1	beta-carotene oxygenase 1
BCL7A	BAF chromatin remodeling complex subunit BCL7A
BCL2L11	BCL2 like 11
BEX4	brain expressed X-linked 4
BEX1	brain expressed X-linked 1
BEST3	bestrophin 3
BDH1	3-hydroxybutyrate dehydrogenase 1
TSPOAP1	TSPO associated protein 1
C10orf25	chromosome 10 open reading frame 25
BTN3A3	butyrophilin subfamily 3 member A3
C11orf71	chromosome 11 open reading frame 71
C11orf96	chromosome 11 open reading frame 96
BORCS7	BLOC-1 related complex subunit 7
C11orf68	chromosome 11 open reading frame 68
BRWD1-AS2	BRWD1 antisense RNA 2
BTBD17	BTB domain containing 17
BRD3	bromodomain containing 3
BRD8	bromodomain containing 8
BTN3A1	butyrophilin subfamily 3 member A1
BTN3A2	butyrophilin subfamily 3 member A2
BTG1	BTG anti-proliferation factor 1
BTG2	BTG anti-proliferation factor 2
ERICH3	glutamate rich 3
SHFL	shiftless antiviral inhibitor of ribosomal frameshifting
C1orf56	chromosome 1 open reading frame 56
ARMH1	armadillo like helical domain containing 1
C17orf82	chromosome 17 open reading frame 82
NATD1	N-acetyltransferase domain containing 1
C19orf57	chromosome 19 open reading frame 57
C19orf38	chromosome 19 open reading frame 38
ARPIN/ARPIN-AP3S2	ARPIN-AP3S2 readthrough
C14orf93	chromosome 14 open reading frame 93
C16orf86	chromosome 16 open reading frame 86
C16orf71	chromosome 16 open reading frame 71
CFAP54	cilia and flagella associated protein 54
TMEM263	transmembrane protein 263
LINC01551	long intergenic non-protein coding RNA 1551
DGLUCY	D-glutamate cyclase
C7orf61	chromosome 7 open reading frame 61
TRMO	tRNA methyltransferase O
AJM1	apical junction component 1 homolog
AOPEP	aminopeptidase O (putative)
ZBED8	zinc finger BED-type containing 8
EXOC3-AS1	EXOC3 antisense RNA 1
IRF1-AS1	IRF1 antisense RNA 1
TRAF3IP2-AS1	TRAF3IP2 antisense RNA 1
C21orf58	chromosome 21 open reading frame 58
LINC01547	long intergenic non-protein coding RNA 1547
C3	complement C3
C3orf18	chromosome 3 open reading frame 18
STUM	stum, mechanosensory transduction mediator homolog
C1QTNF1	C1q and TNF related 1
C1QTNF5	C1q and TNF related 5
NOL4L	nucleolar protein 4 like
CAPS	calcyphosine
CAPN6	calpain 6
CAPN3	calpain 3
CAMSAP3	calmodulin regulated spectrin associated protein family member 3
CALCOCO1	calcium binding and coiled-coil domain 1
CAHM	colon adenocarcinoma hypermethylated
CADM3	cell adhesion molecule 3
CADM2	cell adhesion molecule 2
CACNG4	calcium voltage-gated channel auxiliary subunit gamma 4
CACNA1G	calcium voltage-gated channel subunit alpha1 G
CABP7	calcium binding protein 7
CABLES1	Cdk5 and Abl enzyme substrate 1
CA8	carbonic anhydrase 8
CA14	carbonic anhydrase 14
SPACA9	sperm acrosome associated 9
C9orf47	chromosome 9 open reading frame 47
CCDC163	coiled-coil domain containing 163
CCDC173	coiled-coil domain containing 173
CCDC157	coiled-coil domain containing 157
CCDC162P	coiled-coil domain containing 162, pseudogene
CCDC151	coiled-coil domain containing 151
CCDC154	coiled-coil domain containing 154
CCDC121	coiled-coil domain containing 121
CCDC146	coiled-coil domain containing 146
CBX7	chromobox 7
SGF29	SAGA complex associated factor 29
CBLN3	cerebellin 3 precursor
CBX4	chromobox 4
CASZ1	castor zinc finger 1
CBFA2T2	CBFA2/RUNX1 partner transcriptional co-repressor 2
NBAT1	neuroblastoma associated transcript 1
CASC15	cancer susceptibility 15
CDKN2C	cyclin dependent kinase inhibitor 2C
CDKN1C	cyclin dependent kinase inhibitor 1C
CDK5R2	cyclin dependent kinase 5 regulatory subunit 2
CDK19	cyclin dependent kinase 19
TMEM121B	transmembrane protein 121B
CEBPA-DT	CEBPA divergent transcript
CDON	cell adhesion associated, oncogene regulated
CDO1	cysteine dioxygenase type 1
CENPQ	centromere protein Q
CENPF	centromere protein F
CELF3	CUGBP Elav-like family member 3
CEL	carboxyl ester lipase
CHKB-CPT1B	CHKB-CPT1B readthrough (NMD candidate)
CHAC1	ChaC glutathione specific gamma-glutamylcyclotransferase 1
CH25H	cholesterol 25-hydroxylase
CEP68	centrosomal protein 68
CCL5	C-C motif chemokine ligand 5
CCNB2	cyclin B2
CCDC177	coiled-coil domain containing 177
CCDC28A	coiled-coil domain containing 28A
CCT6P3	chaperonin containing TCP1 subunit 6 pseudogene 3
CD200	CD200 molecule
CCNB3	cyclin B3
CCNG2	cyclin G2
CD5	CD5 molecule
CDC20P1	cell division cycle 20 pseudogene 1
CD247	CD247 molecule
CD24P4	CD24 molecule pseudogene 4
CDC42EP4	CDC42 effector protein 4
CDC42SE2	CDC42 small effector 2
CDC25B	cell division cycle 25B
CDC25C	cell division cycle 25C
CLU	clusterin
CLIP3	CAP-Gly domain containing linker protein 3
CMPK2	cytidine/uridine monophosphate kinase 2
CMC1	C-X9-C motif containing 1
CNGA3	cyclic nucleotide gated channel subunit alpha 3
CNGA2	cyclic nucleotide gated channel subunit alpha 2
CNNM2	cyclin and CBS domain divalent metal cation transport mediator 2
CNKSR1	connector enhancer of kinase suppressor of Ras 1
COL1A2	collagen type I alpha 2 chain
CNTFR	ciliary neurotrophic factor receptor
COL7A1	collagen type VII alpha 1 chain
COL5A2	collagen type V alpha 2 chain
COLQ	collagen like tail subunit of asymmetric acetylcholinesterase
COL9A1	collagen type IX alpha 1 chain
CPLX2	complexin 2
CPA5	carboxypeptidase A5
CHMP1B	charged multivesicular body protein 1B
CHRNA1	cholinergic receptor nicotinic alpha 1 subunit
CICP13	capicua transcriptional repressor pseudogene 13
CICP16	capicua transcriptional repressor pseudogene 16
CIR1	corepressor interacting with RBPJ, 1
CITED2	Cbp/p300 interacting transactivator with Glu/Asp rich carboxy-terminal domain 2
CKB	creatine kinase B
CKS2	CDC28 protein kinase regulatory subunit 2
CLCN4	chloride voltage-gated channel 4
CLCN7	chloride voltage-gated channel 7
CLDN15	claudin 15
CLDN5	claudin 5
CLEC18B	C-type lectin domain family 18 member B
CLEC4F	C-type lectin domain family 4 member F
CLHC1	clathrin heavy chain linker domain containing 1
MIA2	MIA SH3 domain ER export factor 2
CRISPLD2	cysteine rich secretory protein LCCL domain containing 2
CROCC	ciliary rootlet coiled-coil, rootletin
LINC02210	long intergenic non-protein coding RNA 2210
CRIPT	CXXC repeat containing interactor of PDZ3 domain
CREB3L4	cAMP responsive element binding protein 3 like 4
CRELD1	cysteine rich with EGF like domains 1
CRB1	crumbs cell polarity complex component 1
CRB2	crumbs cell polarity complex component 2
CSPG5	chondroitin sulfate proteoglycan 5
CSPG4P10	chondroitin sulfate proteoglycan 4 pseudogene 10
CSAG2/CSAG3*	CSAG family member 3
CSAG2/CSAG3*	CSAG family member 3
CRYM	crystallin mu
CSAG1	chondrosarcoma associated gene 1
CYB5R1	cytochrome b5 reductase 1
CXXC4	CXXC finger protein 4
DAPK2	death associated protein kinase 2
DAG1	dystroglycan 1
CXCL2	C-X-C motif chemokine ligand 2
CTSF	cathepsin F
RTP5	receptor transporter protein 5 (putative)
LINC01560	long intergenic non-protein coding RNA 1560
DCX	doublecortin
DCTN4	dynactin subunit 4
DDX11L2	DEAD/H-box helicase 11 like 2
DDIT4	DNA damage inducible transcript 4
DBP	D-box binding PAR bZIP transcription factor
DAZAP2	DAZ associated protein 2
DCT	dopachrome tautomerase
DCP2	decapping mRNA 2
AGAP10P	ArfGAP with GTPase domain, ankyrin repeat and PH domain 10, pseudogene
DTX3L	deltex E3 ubiquitin ligase 3L
DUSP10	dual specificity phosphatase 10
DOK3	docking protein 3
DRD4	dopamine receptor D4
DNAAF4	dynein axonemal assembly factor 4
E2F2	E2F transcription factor 2
DUSP26	dual specificity phosphatase 26
DYRK1B	dual specificity tyrosine phosphorylation regulated kinase 1B
DNAJB4	DnaJ heat shock protein family (Hsp40) member B4
DNAJC12	DnaJ heat shock protein family (Hsp40) member C12
DMAP1	DNA methyltransferase 1 associated protein 1
DMRTA2	DMRT like family A2
DNASE1L2	deoxyribonuclease 1 like 2
DNER	delta/notch like EGF repeat containing
DNAJC28	DnaJ heat shock protein family (Hsp40) member C28
DNAJC30	DnaJ heat shock protein family (Hsp40) member C30
DICER1-AS1	DICER1 antisense RNA 1
DHX58	DExH-box helicase 58
DHRS3	dehydrogenase/reductase 3
DHRS2	dehydrogenase/reductase 2
DLX2	distal-less homeobox 2
DLX1	distal-less homeobox 1
DLL3	delta like canonical Notch ligand 3
DLL1	delta like canonical Notch ligand 1
DEPTOR	DEP domain containing MTOR interacting protein
DEDD2	death effector domain containing 2
DDX60L	DExD/H-box 60 like
DDX58	DExD/H-box helicase 58
DHRS13	dehydrogenase/reductase 13
DGKB	diacylglycerol kinase beta
DGCR6/LOC102724770	DiGeorge syndrome critical region gene 6
DGAT2	diacylglycerol O-acyltransferase 2
ESAM	endothelial cell adhesion molecule
ETV7	ETS variant transcription factor 7
EXOC3L1	exocyst complex component 3 like 1
EXOG	exo/endonuclease G
EXTL2	exostosin like glycosyltransferase 2
EXTL3	exostosin like glycosyltransferase 3
EZH1	enhancer of zeste 1 polycomb repressive complex 2 subunit
FAM110B	family with sequence similarity 110 member B
EPAS1	endothelial PAS domain protein 1
EPB41L4A-AS1	EPB41L4A antisense RNA 1
EPHB1	EPH receptor B1
EPOR	erythropoietin receptor
EPS8L1	EPS8 like 1
EPSTI1	epithelial stromal interaction 1
ERBB2	erb-b2 receptor tyrosine kinase 2
ERMAP	erythroblast membrane associated protein (Scianna blood group)
ELF1	E74 like ETS transcription factor 1
ELAVL4	ELAV like RNA binding protein 4
EME1	essential meiotic structure-specific endonuclease 1
ELF3	E74 like ETS transcription factor 3
ENC1	ectodermal-neural cortex 1
EMX2	empty spiracles homeobox 2
ENTPD3-AS1	ENTPD3 antisense RNA 1
TEPSIN	TEPSIN adaptor related protein complex 4 accessory protein
EBF3	EBF transcription factor 3
EAPP	E2F associated phosphoprotein
ECSIT	ECSIT signalling integrator
ECE2	endothelin converting enzyme 2
EEF1A1P11	eukaryotic translation elongation factor 1 alpha 1 pseudogene 11
EDNRB	endothelin receptor type B
EHHADH	enoyl-CoA hydratase and 3-hydroxyacyl CoA dehydrogenase
EFNA1	ephrin A1
FBXL8	F-box and leucine rich repeat protein 8
FBXO10	F-box protein 10
FBXL19-AS1	FBXL19 antisense RNA 1
FBXL20	F-box and leucine rich repeat protein 20
FAXDC2	fatty acid hydroxylase domain containing 2
FBLL1	fibrillarin like 1
FAM89B	family with sequence similarity 89 member B
FANCE	FA complementation group E
DIPK1C	divergent protein kinase domain 1C
FAM83H	family with sequence similarity 83 member H
FAM66B	family with sequence similarity 66 member B
DIPK1A	divergent protein kinase domain 1A
MINDY1	MINDY lysine 48 deubiquitinase 1
RIPOR3	RIPOR family member 3
FAM43B	family with sequence similarity 43 member B
FAM53B	family with sequence similarity 53 member B
FAM27E3/FAM27E4*	family with sequence similarity 27 member E3
FAM27E3/FAM27E4*	family with sequence similarity 27 member E3
FAM222A	family with sequence similarity 222 member A
WASHC2A/WASHC2C	WASH complex subunit 2A
PRXL2B	peroxiredoxin like 2B
FAM189B	family with sequence similarity 189 member B
ATPSCKMT	ATP synthase c subunit lysine N-methyltransferase
FAM171A2	family with sequence similarity 171 member A2
FAM161B	FAM161 centrosomal protein B
FAM13C	family with sequence similarity 13 member C
RETREG2	reticulophagy regulator family member 2
RTL8C	retrotransposon Gag like 8C
FAM122C	family with sequence similarity 122C
FAM117A	family with sequence similarity 117 member A
FAM111A	family with sequence similarity 111 member A
FRAT2	FRAT regulator of WNT signaling pathway 2
FRZB	frizzled related protein
FUCA1	alpha-L-fucosidase 1
FUT2	fucosyltransferase 2
FOXO4	forkhead box O4
FOXO6	forkhead box O6
FOXP2	forkhead box P2
FRAT1	FRAT regulator of WNT signaling pathway 1
FOXG1	forkhead box G1
FOXJ1	forkhead box J1
FOXN3-AS1	FOXN3 antisense RNA 1
FOXO3	forkhead box O3
FOXD3	forkhead box D3
FOXD4	forkhead box D4
FOXD4L1	forkhead box D4 like 1
FOXF1	forkhead box F1
FLVCR2	feline leukemia virus subgroup C cellular receptor family member 2
FOXA3	forkhead box A3
FN1	fibronectin 1
FGFR3	fibroblast growth factor receptor 3
FGD3	FYVE, RhoGEF and PH domain containing 3
FIZ1	FLT3 interacting zinc finger 1
FIBIN	fin bud initiation factor homolog
FCGBP	Fc fragment of IgG binding protein
FBXO6	F-box protein 6
FER	FER tyrosine kinase
FCGRT	Fc fragment of IgG receptor and transporter
FBXO25	F-box protein 25
FBXO2	F-box protein 2
FBXO39	F-box protein 39
FBXO32	F-box protein 32
GPRASP1	G protein-coupled receptor associated sorting protein 1
ARMCX5-GPRASP2/GPRASP2	G protein-coupled receptor associated sorting protein 2
GPR62	G protein-coupled receptor 62
GPR88	G protein-coupled receptor 88
GPR35	G protein-coupled receptor 35
GPR37L1	G protein-coupled receptor 37 like 1
GPR173	G protein-coupled receptor 173
GPR179	G protein-coupled receptor 179
GRINA	glutamate ionotropic receptor NMDA type subunit associated protein 1
GRN	granulin precursor
GRASP	general receptor for phosphoinositides 1 associated scaffold protein
GRIA4	glutamate ionotropic receptor AMPA type subunit 4
GPSM2	G protein signaling modulator 2
GRAMD2B	GRAM domain containing 2B
HCN3	hyperpolarization activated cyclic nucleotide gated potassium channel 3
HBP1	HMG-box transcription factor 1
HAS3	hyaluronan synthase 3
H2AJ	H2A.J histone
H1FX-AS1	H1FX antisense RNA 1
H1-0	H1.0 linker histone
GTF2IRD2/GTF2IRD2B	GTF2I repeat domain containing 2
HES4	hes family bHLH transcription factor 4
HERC6	HECT and RLD domain containing E3 ubiquitin protein ligase family member 6
HERC5	HECT and RLD domain containing E3 ubiquitin protein ligase 5
HERC2P3	hect domain and RLD 2 pseudogene 3
HERC2P2	hect domain and RLD 2 pseudogene 2
HEPACAM	hepatic and glial cell adhesion molecule
HELT	helt bHLH transcription factor
HDHD3	haloacid dehalogenase like hydrolase domain containing 3
GATM	glycine amidinotransferase
CASTOR3	CASTOR family member 3
GBGT1	globoside alpha-1,3-N-acetylgalactosaminyltransferase 1 (FORS blood group)
GBP1P1	guanylate binding protein 1 pseudogene 1
FUZ	fuzzy planar cell polarity protein
FZD2	frizzled class receptor 2
GADD45G	growth arrest and DNA damage inducible gamma
GATA2	GATA binding protein 2
GDPD2	glycerophosphodiester phosphodiesterase domain containing 2
GEMIN8	gem nuclear organelle associated protein 8
GGT1	gamma-glutamyltransferase 1
GIMAP2	GTPase, IMAP family member 2
GBP4	guanylate binding protein 4
GCA	grancalcin
GCLC	glutamate-cysteine ligase catalytic subunit
GDPD1	glycerophosphodiester phosphodiesterase domain containing 1
GLYCTK	glycerate kinase
GLTPD2	glycolipid transfer protein domain containing 2
GNAL	G protein subunit alpha L
GLYCTK-AS1	GLYCTK antisense RNA 1
GKAP1	G kinase anchoring protein 1
GJC2	gap junction protein gamma 2
GLRB	glycine receptor beta
GLCCI1	glucocorticoid induced 1
GPD1L	glycerol-3-phosphate dehydrogenase 1 like
GPCPD1	glycerophosphocholine phosphodiesterase 1
GPM6A	glycoprotein M6A
GPER1	G protein-coupled estrogen receptor 1
GNG13	G protein subunit gamma 13
GNAO1	G protein subunit alpha o1
GPC4	glypican 4
GOLPH3L	golgi phosphoprotein 3 like
HRK	harakiri, BCL2 interacting protein
RIDA	reactive intermediate imine deaminase A homolog
PLAAT2	phospholipase A and acyltransferase 2
HRH3	histamine receptor H3
HSCB	HscB mitochondrial iron-sulfur cluster cochaperone
HSD11B2	hydroxysteroid 11-beta dehydrogenase 2
HS1BP3	HCLS1 binding protein 3
HSD17B6	hydroxysteroid 17-beta dehydrogenase 6
HSFX1/HSFX2	heat shock transcription factor family, X-linked 1
HSD17B11	hydroxysteroid 17-beta dehydrogenase 11
HSD17B14	hydroxysteroid 17-beta dehydrogenase 14
HTRA3	HtrA serine peptidase 3
HUNK	hormonally up-regulated Neu-associated kinase
HTR3E	5-hydroxytryptamine receptor 3E
HTRA2	HtrA serine peptidase 2
IFI35	interferon induced protein 35
ID3	inhibitor of DNA binding 3, HLH protein
ID2	inhibitor of DNA binding 2
ICOSLG/LOC102723996	inducible T cell costimulator ligand
IFIT1	interferon induced protein with tetratricopeptide repeats 1
IFIH1	interferon induced with helicase C domain 1
IFI6	interferon alpha inducible protein 6
IFI44	interferon induced protein 44
IFITM1	interferon induced transmembrane protein 1
IFIT5	interferon induced protein with tetratricopeptide repeats 5
IFIT3	interferon induced protein with tetratricopeptide repeats 3
IFIT2	interferon induced protein with tetratricopeptide repeats 2
IFT172	intraflagellar transport 172
IFNL1	interferon lambda 1
IFNB1	interferon beta 1
IFNAR1	interferon alpha and beta receptor subunit 1
HES5	hes family bHLH transcription factor 5
HES6	hes family bHLH transcription factor 6
HES7	hes family bHLH transcription factor 7
HEY1	hes related family bHLH transcription factor with YRPW motif 1
HEYL	hes related family bHLH transcription factor with YRPW motif like
HGFAC	HGF activator
HHIPL1	HHIP like 1
HILPDA	hypoxia inducible lipid droplet associated
H1-9	H1.9 linker histone (pseudogene)
HIRIP3	HIRA interacting protein 3
H1-2	H1.2 linker histone, cluster member
H2AC6	H2A clustered histone 6
H2AC11	H2A clustered histone 11
H2BC5	H2B clustered histone 5
H4C3	H4 clustered histone 3
H2AC18/H2AC19*	H2A clustered histone 18
H2BC20P	H2B clustered histone 20, pseudogene
H2AC18/H2AC19*	H2A clustered histone 18
H2BC21	H2B clustered histone 21
H2BC19P	H2B clustered histone 19, pseudogene
H3C14	H3 clustered histone 14
H3C15	H3 clustered histone 15
H4C15	H4 clustered histone 15
H4C14	H4 clustered histone 14
HLA-E	major histocompatibility complex, class I, E
H2AW	H2A.W histone
HMGN2P5	high mobility group nucleosomal binding domain 2 pseudogene 5
HMGCL	3-hydroxy-3-methylglutaryl-CoA lyase
HNRNPCP1	heterogeneous nuclear ribonucleoprotein C pseudogene 1
HMMR	hyaluronan mediated motility receptor
HOXD4	homeobox D4
HOGA1	4-hydroxy-2-oxoglutarate aldolase 1
KLF13	Kruppel like factor 13
KLF11	Kruppel like factor 11
KLC4	kinesin light chain 4
KIF5A	kinesin family member 5A
KIF20A	kinesin family member 20A
KIF19	kinesin family member 19
CCDC183-AS1	CCDC183 antisense RNA 1
KIAA1614	KIAA1614
KDM8	lysine demethylase 8
KCTD21-AS1	KCTD21 antisense RNA 1
KCTD21	potassium channel tetramerization domain containing 21
KCTD12	potassium channel tetramerization domain containing 12
KCNN3	potassium calcium-activated channel subfamily N member 3
KCNN2	potassium calcium-activated channel subfamily N member 2
KCNN1	potassium calcium-activated channel subfamily N member 1
KCNK3	potassium two pore domain channel subfamily K member 3
LAT	linker for activation of T cells
LDB1	LIM domain binding 1
LAMP5	lysosomal associated membrane protein family member 5
LANCL2	LanC like 2
KRBOX1	KRAB box domain containing 1
LAMA3	laminin subunit alpha 3
KLHL7	kelch like family member 7
KMT2E-AS1	KMT2E antisense RNA 1
KLHL32	kelch like family member 32
KLHL35	kelch like family member 35
KLHL21	kelch like family member 21
KLHL24	kelch like family member 24
KLF4	Kruppel like factor 4
KLHDC9	kelch domain containing 9
KLF15	Kruppel like factor 15
KLF2	Kruppel like factor 2
IRX1	iroquois homeobox 1
IRF7	interferon regulatory factor 7
ISG15	ISG15 ubiquitin like modifier
IRX6	iroquois homeobox 6
INPP5K	inositol polyphosphate-5-phosphatase K
INPP5D	inositol polyphosphate-5-phosphatase D
IQCH-AS1	IQCH antisense RNA 1
INSM2	INSM transcriptional repressor 2
IL4I1	interleukin 4 induced 1
IGSF9	immunoglobulin superfamily member 9
ING4	inhibitor of growth family member 4
ILF3-DT	ILF3 divergent transcript
IGDCC3	immunoglobulin superfamily DCC subclass member 3
IFT20	intraflagellar transport 20
IGSF11	immunoglobulin superfamily member 11
IGFBP6	insulin like growth factor binding protein 6
KBTBD7	kelch repeat and BTB domain containing 7
KCNIP3	potassium voltage-gated channel interacting protein 3
KCNJ10	potassium inwardly rectifying channel subfamily J member 10
KCNJ9	potassium inwardly rectifying channel subfamily J member 9
KANK4	KN motif and ankyrin repeat domains 4
KAT6B	lysine acetyltransferase 6B
KATNAL2	katanin catalytic subunit A1 like 2
JMY	junction mediating and regulatory protein, p53 cofactor
JOSD2	Josephin domain containing 2
JPH3	junctophilin 3
JUP	junction plakoglobin
ISG20	interferon stimulated exonuclease gene 20
ITGB5	integrin subunit beta 5
JAKMIP2	janus kinase and microtubule interacting protein 2
JAZF1	JAZF zinc finger 1
MANBA	mannosidase beta
MALAT1	metastasis associated lung adenocarcinoma transcript 1
MAGIX	MAGI family member, X-linked
MADCAM1	mucosal vascular addressin cell adhesion molecule 1
MAP4K1	mitogen-activated protein kinase kinase kinase kinase 1
MAP3K8	mitogen-activated protein kinase kinase kinase 8
MAP2K6	mitogen-activated protein kinase kinase 6
MAP2K5	mitogen-activated protein kinase kinase 5
LTB4R2	leukotriene B4 receptor 2
LRRTM3	leucine rich repeat transmembrane neuronal 3
LRRN2	leucine rich repeat neuronal 2
LRRN1	leucine rich repeat neuronal 1
MACROD2	mono-ADP ribosylhydrolase 2
LYRM7	LYR motif containing 7
LYPD6	LY6/PLAUR domain containing 6
LUC7L2	LUC7 like 2, pre-mRNA splicing factor
MED30	mediator complex subunit 30
BORCS8-MEF2B	BORCS8-MEF2B readthrough
MCF2L-AS1	MCF2L antisense RNA 1
MDFI	MyoD family inhibitor
MESP1	mesoderm posterior bHLH transcription factor 1
MEST	mesoderm specific transcript
MEGF10	multiple EGF like domains 10
MEIS1	Meis homeobox 1
MAPK8IP2	mitogen-activated protein kinase 8 interacting protein 2
MARCKS	myristoylated alanine rich protein kinase C substrate
MAP6	microtubule associated protein 6
MAPK8IP1	mitogen-activated protein kinase 8 interacting protein 1
MB21D2	Mab-21 domain containing 2
MBOAT1	membrane bound O-acyltransferase domain containing 1
MAST1	microtubule associated serine/threonine kinase 1
MAT2B	methionine adenosyltransferase 2B
LINC00461	long intergenic non-protein coding RNA 461
LINC00174	long intergenic non-protein coding RNA 174
MIR99AHG	mir-99a-let-7c cluster host gene
LINC00472	long intergenic non-protein coding RNA 472
LINC00634	long intergenic non-protein coding RNA 634
LINC00537	long intergenic non-protein coding RNA 537
LINC00639	long intergenic non-protein coding RNA 639
LINC00638	long intergenic non-protein coding RNA 638
LFNG	LFNG O-fucosylpeptide 3-beta-N-acetylglucosaminyltransferase
LETMD1	LETM1 domain containing 1
LGR5	leucine rich repeat containing G protein-coupled receptor 5
LGALS9	galectin 9
LIMCH1	LIM and calponin homology domains 1
LIAS	lipoic acid synthetase
LIN52	lin-52 DREAM MuvB core complex component
LIMS2	LIM zinc finger domain containing 2
LMO1	LIM domain only 1
LMO4	LIM domain only 4
LMTK3	lemur tyrosine kinase 3
LOH12CR2	loss of heterozygosity, 12, chromosomal region 2
LRRC17	leucine rich repeat containing 17
LRRC27	leucine rich repeat containing 27
LRRC37A17P	leucine rich repeat containing 37 member A17, pseudogene
LINC00680
LINC00886	long intergenic non-protein coding RNA 886
LINC00896	long intergenic non-protein coding RNA 896
LINC00899	long intergenic non-protein coding RNA 899
MIR9-3HG	MIR9-3 host gene
LINC01003	long intergenic non-protein coding RNA 1003
LIPT2	lipoyl(octanoyl) transferase 2
LIX1L	limb and CNS expressed 1 like
MYCL	MYCL proto-oncogene, bHLH transcription factor
MXI1	MAX interactor 1, dimerization protein
MYO5BP2	myosin VB pseudogene 2
MYD88	MYD88 innate immune signal transduction adaptor
MX2	MX dynamin like GTPase 2
MX1	MX dynamin like GTPase 1
MXD4	MAX dimerization protein 4
MXD3	MAX dimerization protein 3
NAPA	NSF attachment protein alpha
NAIP	NLR family apoptosis inhibitory protein
NCALD	neurocalcin delta
NBR1	NBR1 autophagy cargo receptor
MYT1	myelin transcription factor 1
MYOG	myogenin
NADK2	NAD kinase 2, mitochondrial
N4BP2L1	NEDD4 binding protein 2 like 1
MTND1P23	MT-ND1 pseudogene 23
MTND4P12	MT-ND4 pseudogene 12
MTSS1	MTSS I-BAR domain containing 1
MT-TD	tRNA
MT1E	metallothionein 1E
MT1F	metallothionein 1F
MT1M	metallothionein 1M
MT2A	metallothionein 2A
MUC20	mucin 20, cell surface associated
MMUT	methylmalonyl-CoA mutase
MUTYH	mutY DNA glycosylase
MT-TI	tRNA
MT-TT	tRNA
MT-TV	tRNA
MTUS1	microtubule associated scaffold protein 1
MPPED2	metallophosphoesterase domain containing 2
MOB2	MOB kinase activator 2
MNT	MAX network transcriptional repressor
MND1	meiotic nuclear divisions 1
MN1	MN1 proto-oncogene, transcriptional regulator
MMP15	matrix metallopeptidase 15
MMP11	matrix metallopeptidase 11
AFDN-DT	AFDN divergent transcript
MST1P2	macrophage stimulating 1 pseudogene 2
MST1L	macrophage stimulating 1 like
MST1	macrophage stimulating 1
MSH6	mutS homolog 6
MRPS35	mitochondrial ribosomal protein S35
MRPL49	mitochondrial ribosomal protein L49
MPST	mercaptopyruvate sulfurtransferase
MPRIPP1	myosin phosphatase Rho interacting protein pseudogene 1
MIMT1	MER1 repeat containing imprinted transcript 1
MIR17HG	miR-17-92a-1 cluster host gene
MFNG	MFNG O-fucosylpeptide 3-beta-N-acetylglucosaminyltransferase
MIEF2	mitochondrial elongation factor 2
METTL7A	methyltransferase like 7A
MFAP4	microfibril associated protein 4
CSKMT	citrate synthase lysine methyltransferase
METTL25	methyltransferase like 25
MKS1	MKS transition zone complex subunit 1
MLLT3	MLLT3 super elongation complex subunit
MITF	melanocyte inducing transcription factor
MKRN3	makorin ring finger protein 3
MIS18BP1	MIS18 binding protein 1
mir-3615	microRNA 3615
mir-3648	microRNA 3648-1
OIP5	Opa interacting protein 5
OGFR	opioid growth factor receptor
OLIG2	oligodendrocyte transcription factor 2
OLIG1	oligodendrocyte transcription factor 1
OMG	oligodendrocyte myelin glycoprotein
OMA1	OMA1 zinc metallopeptidase
OPRL1	opioid related nociceptin receptor 1
OPHN1	oligophrenin 1
OR7E38P	olfactory receptor family 7 subfamily E member 38 pseudogene
OPTN	optineurin
LTO1	LTO1 maturation factor of ABCE1
OR7E7P	olfactory receptor family 7 subfamily E member 7 pseudogene
OSR2	odd-skipped related transciption factor 2
OSER1-DT	OSER1 divergent transcript
OTP	orthopedia homeobox
OTOF	otoferlin
NRSN1	neurensin 1
NTN3	netrin 3
NTRK2	neurotrophic receptor tyrosine kinase 2
NTSR1	neurotensin receptor 1
NUAK2	NUAK family kinase 2
NUF2	NUF2 component of NDC80 kinetochore complex
NUMA1	nuclear mitotic apparatus protein 1
NUPR1	nuclear protein 1, transcriptional regulator
NUTM2A/NUTM2B	NUT family member 2A
NUTM2E	NUT family member 2E
NXF1	nuclear RNA export factor 1
NYAP1	neuronal tyrosine phosphorylated phosphoinositide-3-kinase adaptor 1
OAS1	2'-5'-oligoadenylate synthetase 1
OAS2	2'-5'-oligoadenylate synthetase 2
OASL	2'-5'-oligoadenylate synthetase like
ODF3B	outer dense fiber of sperm tails 3B
NMNAT1	nicotinamide nucleotide adenylyltransferase 1
NMI	N-myc and STAT interactor
NMB	neuromedin B
NLRC5	NLR family CARD domain containing 5
NOVA2	NOVA alternative splicing regulator 2
NOP14-AS1	NOP14 antisense RNA 1
NOD2	nucleotide binding oligomerization domain containing 2
NMNAT3	nicotinamide nucleotide adenylyltransferase 3
NR1D2	nuclear receptor subfamily 1 group D member 2
NPTX1	neuronal pentraxin 1
NPC2	NPC intracellular cholesterol transporter 2
NOXO1	NADPH oxidase organizer 1
NRG2	neuregulin 2
NRARP	NOTCH regulated ankyrin repeat protein
NR4A2	nuclear receptor subfamily 4 group A member 2
NR2F1	nuclear receptor subfamily 2 group F member 1
NDP	norrin cystine knot growth factor NDP
NEAT1	nuclear paraspeckle assembly transcript 1
NCOA5	nuclear receptor coactivator 5
NDC80	NDC80 kinetochore complex component
NEU4	neuraminidase 4
NEURL2	neuralized E3 ubiquitin protein ligase 2
NEDD4L	NEDD4 like E3 ubiquitin protein ligase
NELL1	neural EGFL like 1
NFIB	nuclear factor I B
NFKBIA	NFKB inhibitor alpha
NEURL3	neuralized E3 ubiquitin protein ligase 3
NFIA	nuclear factor I A
NKAIN4	sodium/potassium transporting ATPase interacting 4
NKD1	NKD inhibitor of WNT signaling pathway 1
NFKBIZ	NFKB inhibitor zeta
NHLH1	nescient helix-loop-helix 1
PLSCR1	phospholipid scramblase 1
PLVAP	plasmalemma vesicle associated protein
PLXNA2	plexin A2
PLXNC1	plexin C1
PLIN5	perilipin 5
KIZ	kizuna centrosomal protein
PLK2	polo like kinase 2
PLP1	proteolipid protein 1
PLEKHA4	pleckstrin homology domain containing A4
PLEKHA7	pleckstrin homology domain containing A7
PLEKHF2	pleckstrin homology and FYVE domain containing 2
PLIN4	perilipin 4
PLA2G6	phospholipase A2 group VI
PLCH1	phospholipase C eta 1
PLCL2	phospholipase C like 2
PLD5	phospholipase D family member 5
PINK1	PTEN induced kinase 1
PIK3IP1	phosphoinositide-3-kinase interacting protein 1
PLA2G4C	phospholipase A2 group IVC
PKNOX2	PBX/knotted 1 homeobox 2
PIH1D2	PIH1 domain containing 2
PIGV	phosphatidylinositol glycan anchor biosynthesis class V
PIK3C2B	phosphatidylinositol-4-phosphate 3-kinase catalytic subunit type 2 beta
PIK3AP1	phosphoinositide-3-kinase adaptor protein 1
PHC1P1	polyhomeotic homolog 1 pseudogene 1
PGM5	phosphoglucomutase 5
PIGB	phosphatidylinositol glycan anchor biosynthesis class B
PIF1	PIF1 5'-to-3' DNA helicase
PDZRN3	PDZ domain containing ring finger 3
PDZD2	PDZ domain containing 2
PGBD3	piggyBac transposable element derived 3
PEX11B	peroxisomal biogenesis factor 11 beta
PDK2	pyruvate dehydrogenase kinase 2
PDPK1	3-phosphoinositide dependent protein kinase 1
PDE3A	phosphodiesterase 3A
PDGFRL	platelet derived growth factor receptor like
PDCD4	programmed cell death 4
PDCD4-AS1	PDCD4 antisense RNA 1
PCSK2	proprotein convertase subtilisin/kexin type 2
PCSK4	proprotein convertase subtilisin/kexin type 4
PCMTD1	protein-L-isoaspartate (D-aspartate) O-methyltransferase domain containing 1
PCOLCE	procollagen C-endopeptidase enhancer
PCDHA13	protocadherin alpha 13
PCDHA3	protocadherin alpha 3
PCDH18	protocadherin 18
PCDH8	protocadherin 8
PCBP4	poly(rC) binding protein 4
PCCA	propionyl-CoA carboxylase subunit alpha
PCBD2	pterin-4 alpha-carbinolamine dehydratase 2
PBXIP1	PBX homeobox interacting protein 1
PBX3	PBX homeobox 3
PBK	PDZ binding kinase
PAX6	paired box 6
PATL2	PAT1 homolog 2
PARP12	poly(ADP-ribose) polymerase family member 12
PARP10	poly(ADP-ribose) polymerase family member 10
PARD6A	par-6 family cell polarity regulator alpha
PAIP2	poly(A) binding protein interacting protein 2
P2RY2	purinergic receptor P2Y2
P2RX7	purinergic receptor P2X 7
OTX2	orthodenticle homeobox 2
OTX1	orthodenticle homeobox 1
OTUD1	OTU deubiquitinase 1
OTUB1	OTU deubiquitinase, ubiquitin aldehyde binding 1
RELB	RELB proto-oncogene, NF-kB subunit
RENBP	renin binding protein
REP15	RAB15 effector protein
RFTN2	raftlin family member 2
RFX4	regulatory factor X4
RTL9	retrotransposon Gag like 9
RTL5	retrotransposon Gag like 5
RGMA	repulsive guidance molecule BMP co-receptor a
RASL11B	RAS like family 11 member B
RASSF10	Ras association domain family member 10
RASSF4	Ras association domain family member 4
RBM43	RNA binding motif protein 43
RCBTB2	RCC1 and BTB domain containing protein 2
RCOR2	REST corepressor 2
RDM1	RAD52 motif containing 1
RECQL5	RecQ like helicase 5
RAD51AP1	RAD51 associated protein 1
RABGAP1L	RAB GTPase activating protein 1 like
RANBP3L	RAN binding protein 3 like
RALGDS	ral guanine nucleotide dissociation stimulator
RASD1	ras related dexamethasone induced 1
PLAAT4	phospholipase A and acyltransferase 4
RASGRP3	RAS guanyl releasing protein 3
RASD2	RASD family member 2
PXDNL	peroxidasin like
PTPN3	protein tyrosine phosphatase non-receptor type 3
RAB11B-AS1	RAB11B antisense RNA 1
QRICH2	glutamine rich 2
RAB3C	RAB3C, member RAS oncogene family
RAB33A	RAB33A, member RAS oncogene family
RABEP2	rabaptin, RAB GTPase binding effector protein 2
RAB3IL1	RAB3A interacting protein like 1
PSMB9	proteasome subunit beta 9
PTCH1	patched 1
PRUNE1	prune exopolyphosphatase 1
PSMB10	proteasome subunit beta 10
PTGES	prostaglandin E synthase
PTGES3L-AARSD1	PTGES3L-AARSD1 readthrough
DISP3	dispatched RND transporter family member 3
PTGDS	prostaglandin D2 synthase
PPP1R3E	protein phosphatase 1 regulatory subunit 3E
PPP1R9A	protein phosphatase 1 regulatory subunit 9A
PPIC	peptidylprolyl isomerase C
PPM1H	protein phosphatase, Mg2+/Mn2+ dependent 1H
PRR19	proline rich 19
PRRT2	proline rich transmembrane protein 2
PROCA1	protein interacting with cyclin A1
LOC102724788/PRODH	proline dehydrogenase 1
POU2F1	POU class 2 homeobox 1
POMZP3	POM121 and ZP3 fusion
POLR3GL	RNA polymerase III subunit G like
POLE4	DNA polymerase epsilon 4, accessory subunit
PPFIBP2	PPFIA binding protein 2
PLPP6	phospholipid phosphatase 6
POU3F4	POU class 3 homeobox 4
POU3F3	POU class 3 homeobox 3
PNCK	pregnancy up-regulated nonubiquitous CaM kinase
PML	promyelocytic leukemia
PMF1/PMF1-BGLAP	polyamine modulated factor 1
PMEPA1	prostate transmembrane protein, androgen induced 1
POC1A	POC1 centriolar protein A
PNRC1	proline rich nuclear receptor coactivator 1
PNPLA7	patatin like phospholipase domain containing 7
PNMA8B	PNMA family member 8B
RN7SK	RNA component of 7SK nuclear ribonucleoprotein
RNASEK-C17orf49	RNASEK-C17orf49 readthrough
RND1	Rho family GTPase 1
RND3	Rho family GTPase 3
RNF112	ring finger protein 112
RNF122	ring finger protein 122
RNF146	ring finger protein 146
RNF19B	ring finger protein 19B
RGR	retinal G protein coupled receptor
RGS16	regulator of G protein signaling 16
RGS3	regulator of G protein signaling 3
RHBDL3	rhomboid like 3
RHOQ	ras homolog family member Q
RIBC1	RIB43A domain with coiled-coils 1
RIMBP3 (includes others)	RIMS binding protein 3
RMI2	RecQ mediated genome instability 2
RNF208	ring finger protein 208
RPL17-C18orf32	RPL17-C18orf32 readthrough
RPL13AP25	ribosomal protein L13a pseudogene 25
RPL32P29	ribosomal protein L32 pseudogene 29
RPL24P2	ribosomal protein L24 pseudogene 2
RRAGC	Ras related GTP binding C
RRAD	RRAD, Ras related glycolysis inhibitor and calcium channel regulator
RSAD2	radical S-adenosyl methionine domain containing 2
RSAD1	radical S-adenosyl methionine domain containing 1
RPPH1	ribonuclease P RNA component H1
RPP25L	ribonuclease P/MRP subunit p25 like
RPSAP54	ribosomal protein SA pseudogene 54
RPS10P3	ribosomal protein S10 pseudogene 3
RXRA	retinoid X receptor alpha
RXRB	retinoid X receptor beta
RXRG	retinoid X receptor gamma
SAMD13	sterile alpha motif domain containing 13
CPLANE2	ciliogenesis and planar polarity effector 2
RTN4RL1	reticulon 4 receptor like 1
RTP4	receptor transporter protein 4
RUFY4	RUN and FYVE domain containing 4
SCARNA12	small Cajal body-specific RNA 12
SCHIP1	schwannomin interacting protein 1
SCN3A	sodium voltage-gated channel alpha subunit 3
SCRT2	scratch family transcriptional repressor 2
SAMD9	sterile alpha motif domain containing 9
SAMD9L	sterile alpha motif domain containing 9 like
SAMHD1	SAM and HD domain containing deoxynucleoside triphosphate triphosphohydrolase 1
SBSPON	somatomedin B and thrombospondin type 1 domain containing
SFR1	SWI5 dependent homologous recombination repair protein 1
SELENOP	selenoprotein P
SEMA6C	semaphorin 6C
SEMA4B	semaphorin 4B
SEC61A1	SEC61 translocon alpha 1 subunit
SEC22A	SEC22 homolog A, vesicle trafficking protein
SDCCAG8	serologically defined colon cancer antigen 8
SDAD1P1	SDA1 domain containing 1 pseudogene 1
SIX2	SIX homeobox 2
SIM2	SIM bHLH transcription factor 2
SHOX2	short stature homeobox 2
SHF	Src homology 2 domain containing F
SHD	Src homology 2 domain containing transforming protein D
SH3GL1P3	SH3 domain containing GRB2 like 1, endophilin A2 pseudogene 3
SH3BP5L	SH3 binding domain protein 5 like
SFRP2	secreted frizzled related protein 2
SLC25A42	solute carrier family 25 member 42
SLC25A45	solute carrier family 25 member 45
SLC24A3	solute carrier family 24 member 3
SLC24A5	solute carrier family 24 member 5
SKOR1	SKI family transcriptional corepressor 1
SLC15A3	solute carrier family 15 member 3
SIX3	SIX homeobox 3
SIX5	SIX homeobox 5
SLC5A3	solute carrier family 5 member 3
SLC6A12	solute carrier family 6 member 12
SLC47A2	solute carrier family 47 member 2
SLC4A4	solute carrier family 4 member 4
SLC2A4	solute carrier family 2 member 4
SLC43A1	solute carrier family 43 member 1
SLC29A3	solute carrier family 29 member 3
SLC2A12	solute carrier family 2 member 12
TMEFF1	transmembrane protein with EGF like and two follistatin like domains 1
TMCC1-AS1	TMCC1 antisense RNA 1 (head to head)
TMCC1	transmembrane and coiled-coil domain family 1
TLR3	toll like receptor 3
TLL2	tolloid like 2
TLE6	TLE family member 6, subcortical maternal complex member
TLE3	TLE family member 3, transcriptional corepressor
TLE2	TLE family member 2, transcriptional corepressor
TIGD3	tigger transposable element derived 3
TIGD2	tigger transposable element derived 2
THTPA	thiamine triphosphatase
THRA	thyroid hormone receptor alpha
THEMIS2	thymocyte selection associated family member 2
THAP8	THAP domain containing 8
THAP7-AS1	THAP7 antisense RNA 1
THAP2	THAP domain containing 2
TFAP4	transcription factor AP-4
TGFB2	transforming growth factor beta 2
TF	transferrin
TFAP2A-AS1	TFAP2A antisense RNA 1
TESK2	testis associated actin remodelling kinase 2
TEX264	testis expressed 264, ER-phagy receptor
TEKT2	tektin 2
TEN1	TEN1 subunit of CST complex
TCP11L2	t-complex 11 like 2
TCTA	T cell leukemia translocation altered
TCF7L1	transcription factor 7 like 1
TCF7L2	transcription factor 7 like 2
TBX1	T-box transcription factor 1
TBX6	T-box transcription factor 6
TBC1D2	TBC1 domain family member 2
TBC1D5	TBC1 domain family member 5
TOR4A	torsin family 4 member A
TOP2A	DNA topoisomerase II alpha
TPP1	tripeptidyl peptidase 1
TOX3	TOX high mobility group box family member 3
TOB1-AS1	TOB1 antisense RNA 1
TNRC18P3	trinucleotide repeat containing 18 pseudogene 3
TOM1	target of myb1 membrane trafficking protein
TOLLIP-AS1	TOLLIP antisense RNA 1 (head to head)
TNFSF10	TNF superfamily member 10
TNFRSF6B	TNF receptor superfamily member 6b
TNR	tenascin R
TNK2	tyrosine kinase non receptor 2
TNFAIP3	TNF alpha induced protein 3
TNFAIP2	TNF alpha induced protein 2
TNFRSF14	TNF receptor superfamily member 14
TNFRSF13C	TNF receptor superfamily member 13C
TMEM44-AS1	TMEM44 antisense RNA 1
TMEM62	transmembrane protein 62
TMEM86A	transmembrane protein 86A
TMSB4XP8	TMSB4X pseudogene 8
TMEM255A	transmembrane protein 255A
TMEM33	transmembrane protein 33
TMEM35A	transmembrane protein 35A
TMEM42	transmembrane protein 42
TMEM161B-AS1	TMEM161B antisense RNA 1
TMEM187	transmembrane protein 187
TMEM229B	transmembrane protein 229B
TMEM249	transmembrane protein 249
TMEM102	transmembrane protein 102
TMEM106C	transmembrane protein 106C
TMEM108	transmembrane protein 108
TMEM143	transmembrane protein 143
SPARCL1	SPARC like 1
SPAG9	sperm associated antigen 9
SP9	Sp9 transcription factor
SP8	Sp8 transcription factor
SPIB	Spi-B transcription factor
SPHK2	sphingosine kinase 2
SPECC1L	sperm antigen with calponin homology and coiled-coil domains 1 like
SPDYE2 (includes others)	speedy/RINGO cell cycle regulator family member E2
SOX4	SRY-box transcription factor 4
SOX15	SRY-box transcription factor 15
SORBS3	sorbin and SH3 domain containing 3
SNORD3A	small nucleolar RNA, C/D box 3A
SP5	Sp5 transcription factor
SP110	SP110 nuclear body protein
SP100	SP100 nuclear antigen
SOX8	SRY-box transcription factor 8
SNAP23	synaptosome associated protein 23
SNCAIP	synuclein alpha interacting protein
SMOC1	SPARC related modular calcium binding 1
SMTNL1	smoothelin like 1
SNORA50C	small nucleolar RNA, H/ACA box 50C
SNORD104	small nucleolar RNA, C/D box 104
SNHG5	small nucleolar RNA host gene 5
SNHG7	small nucleolar RNA host gene 7
SLC8A2	solute carrier family 8 member A2
SLC9A4	solute carrier family 9 member A4
SLC6A8	solute carrier family 6 member 8
SLC7A10	solute carrier family 7 member 10
SMARCA5-AS1	SMARCA5 antisense RNA 1
SMIM14	small integral membrane protein 14
SLX1B-SULT1A4	SLX1B-SULT1A4 readthrough (NMD candidate)
SMAD9	SMAD family member 9
SYNE1	spectrin repeat containing nuclear envelope protein 1
SYF2	SYF2 pre-mRNA splicing factor
TAPBPL	TAP binding protein like
SYT3	synaptotagmin 3
TARS2	threonyl-tRNA synthetase 2, mitochondrial
TAPT1-AS1	TAPT1 antisense RNA 1 (head to head)
TBC1D17	TBC1 domain family member 17
TAS1R3	taste 1 receptor member 3
STON1	stonin 1
STAT2	signal transducer and activator of transcription 2
STOX2	storkhead box 2
STOX1	storkhead box 1
SULT1C4	sulfotransferase family 1C member 4
STX10	syntaxin 10
KMT5C	lysine methyltransferase 5C
SUPT3H	SPT3 homolog, SAGA and STAGA complex component
ST18	ST18 C2H2C-type zinc finger transcription factor
ST20-MTHFS	ST20-MTHFS readthrough
ST3GAL5	ST3 beta-galactoside alpha-2,3-sialyltransferase 5
ST3GAL6	ST3 beta-galactoside alpha-2,3-sialyltransferase 6
ST6GAL1	ST6 beta-galactoside alpha-2,6-sialyltransferase 1
ST6GALNAC2	ST6 N-acetylgalactosaminide alpha-2,6-sialyltransferase 2
ST7-AS1	ST7 antisense RNA 1
STARD10	StAR related lipid transfer domain containing 10
SPOCK2	SPARC (osteonectin), cwcv and kazal like domains proteoglycan 2
SPSB3	splA/ryanodine receptor domain and SOCS box containing 3
SPSB4	splA/ryanodine receptor domain and SOCS box containing 4
SPTBN5	spectrin beta, non-erythrocytic 5
SRGAP3	SLIT-ROBO Rho GTPase activating protein 3
SRRM3	serine/arginine repetitive matrix 3
SRSF6	serine and arginine rich splicing factor 6
SSBP3	single stranded DNA binding protein 3
ZNF239	zinc finger protein 239
ZNF253	zinc finger protein 253
ZNF184	zinc finger protein 184
ZNF235	zinc finger protein 235
ZHX2	zinc fingers and homeoboxes 2
ZMYND15	zinc finger MYND-type containing 15
ZFYVE28	zinc finger FYVE-type containing 28
ZGLP1	zinc finger GATA like protein 1
ZNF438	zinc finger protein 438
ZNF491	zinc finger protein 491
ZNF396	zinc finger protein 396
ZNF425	zinc finger protein 425
ZNF358	zinc finger protein 358
ZNF385C	zinc finger protein 385C
ZNF33B	zinc finger protein 33B
ZNF345	zinc finger protein 345
ZBTB49	zinc finger and BTB domain containing 49
ZBTB18	zinc finger and BTB domain containing 18
ZBTB12	zinc finger and BTB domain containing 12
ZBTB11-AS1	ZBTB11 antisense RNA 1
ZBP1	Z-DNA binding protein 1
ZBED5-AS1	ZBED5 antisense RNA 1
YTHDF3	YTH N6-methyladenosine RNA binding protein 3
ZFYVE1	zinc finger FYVE-type containing 1
ZFP69B	ZFP69 zinc finger protein B
ZFP14	ZFP14 zinc finger protein
ZDHHC22	zinc finger DHHC-type containing 22
ZDHHC12	zinc finger DHHC-type containing 12
ZDHHC11	zinc finger DHHC-type containing 11
ZCWPW1	zinc finger CW-type and PWWP domain containing 1
ZCCHC18	zinc finger CCHC-type containing 18
ZNF844	zinc finger protein 844
ZRANB3	zinc finger RANBP2-type containing 3
ZSCAN2	zinc finger and SCAN domain containing 2
ZSCAN31	zinc finger and SCAN domain containing 31
ZNF575	zinc finger protein 575
ZNF572	zinc finger protein 572
ZNF581	zinc finger protein 581
ZNF579	zinc finger protein 579
ZNF524	zinc finger protein 524
ZNF518A	zinc finger protein 518A
ZNF546	zinc finger protein 546
ZNF527	zinc finger protein 527
ZNF775	zinc finger protein 775
ZNF747	zinc finger protein 747
ZNF8	zinc finger protein 8
ZNF788P	zinc finger family member 788, pseudogene
ZNF688	zinc finger protein 688
ZNF610	zinc finger protein 610
ZNF737	zinc finger protein 737
ZNF703	zinc finger protein 703
TUB	TUB bipartite transcription factor
TTK	TTK protein kinase
TTPA	alpha tocopherol transfer protein
UBALD2	UBA like domain containing 2
UBE2H	ubiquitin conjugating enzyme E2 H
UAP1L1	UDP-N-acetylglucosamine pyrophosphorylase 1 like 1
UBA7	ubiquitin like modifier activating enzyme 7
UCP3	uncoupling protein 3
ULK1	unc-51 like autophagy activating kinase 1
UBE2L6	ubiquitin conjugating enzyme E2 L6
UCN	urocortin
UNC93B1	unc-93 homolog B1, TLR signaling regulator
UPF3B	UPF3B regulator of nonsense mediated mRNA decay
UNC13D	unc-13 homolog D
UNC79	unc-79 homolog, NALCN channel complex subunit
TREX1	three prime repair exonuclease 1
TRANK1	tetratricopeptide repeat and ankyrin repeat containing 1
TRADD	TNFRSF1A associated via death domain
TPPP3	tubulin polymerization promoting protein family member 3
TRIM34	tripartite motif containing 34
TRIM22	tripartite motif containing 22
TRIM21	tripartite motif containing 21
TRIL	TLR4 interactor with leucine rich repeats
TRIT1	tRNA isopentenyltransferase 1
TRIM73/TRIM74	tripartite motif containing 74
TRIM68	tripartite motif containing 68
TRIM45	tripartite motif containing 45
TTC34	tetratricopeptide repeat domain 34
TSNAXIP1	translin associated factor X interacting protein 1
TSNARE1	t-SNARE domain containing 1
TSC22D3	TSC22 domain family member 3
WASH6P	WASP family homolog 6, pseudogene
WDR25	WD repeat domain 25
WDR45	WD repeat domain 45
WDR49	WD repeat domain 49
WDR81	WD repeat domain 81
WDSUB1	WD repeat, sterile alpha motif and U-box domain containing 1
NSD2	nuclear receptor binding SET domain protein 2
WIPI1	WD repeat domain, phosphoinositide interacting 1
WNT10A	Wnt family member 10A
WNT7A	Wnt family member 7A
XAF1	XIAP associated factor 1
XRRA1	X-ray radiation resistance associated 1
YPEL1	yippee like 1
YPEL3	yippee like 3
YPEL5	yippee like 5
USP18	ubiquitin specific peptidase 18
UPRT	uracil phosphoribosyltransferase homolog
USP20	ubiquitin specific peptidase 20
USP2	ubiquitin specific peptidase 2
USP41	ubiquitin specific peptidase 41
USP2-AS1	USP2 antisense RNA 1 (head to head)
VAPB	VAMP associated protein B and C
USP6	ubiquitin specific peptidase 6
VCAM1	vascular cell adhesion molecule 1
VASN	vasorin
VIPAS39	VPS33B interacting protein, apical-basolateral polarity regulator, spe-39 homolog
VEPH1	ventricular zone expressed PH domain containing 1
VPS37D	VPS37D subunit of ESCRT-I
VMAC	vimentin type intermediate filament associated coiled-coil protein
VSTM4	V-set and transmembrane domain containing 4
VPS9D1	VPS9 domain containing 1
